# Supplementary material
Source: Research Square preprint supplement (doi:10.21203/rs.3.rs-8253372/v2)
Supplement: Supplementary file 1 [file 06d0b9ae747888b055eaa23e.xlsx]

## Sheet: Table A Full PRJ Source List
DOI (PMID if no DOI)	In which data tables	Authors	Year	Title	Journal	Volume	Issue	Pages	Country	Study Design (closest dropdown choice)	Study design (brief description)	Sample(s) (N, age, briefly who)	Recruitment (drop down choices)	Population and recruitment details	Intervention(s)/Exposure(s) (dropdown choices)	Intervention/Exposure Details	Comparison/Reference Group(s) Present?	Comparison Group Details	Outcome types (dropdown choices)	Outcome timing (dropdown choices)	Outcome assessment (details)	Outcome assessor blinded?	Researcher Positionality/Reflexivity Noted	Key Quantitative Results	Key Qualiative Themes	Funding Sources	COI? (dropdown)	COI Statement	Notes	SLR Counts
10.1016/j.contraception.2023.110131	Menstrual Suppression	Abernathey, Liz and Ryan, Morgan E and Golub, Sarah and Ahrens, Kym and Milliren, Carly E and Borzutzky, Claudia and Maslyanskaya, Sofya and DiVasta, Amy D and Pitts, Sarah	2023	Long-acting reversible contraception in gender-diverse adolescents and young adults: Outcomes from a multisite collaborative.	Contraception	127		110131	USA	Cross-sectional or Obervational Cohort	Secondary analysis of prospectively collected quality improvement data with no control group	N=203; ages 13–26. Mean age at insertion: 17.8 years for implant, 17.6 years for IUD. Given the mean, most participants were <18, but outcomes not stratified by age.	Specialist gender clinic,Other clinic	Multisite chart review across three paediatric/adolescent gender clinics. Eligible participants: gender-diverse adolescents and young adults aged 13–26 years who received LARC (implant or IUD).	Menstrual Suppression / Hormonal Contraception	Subdermal implant and intrauterine device (IUD) use for menstrual suppression and contraception in gender-diverse adolescents and young adults.			Physical health,Tx trajectory/Persistance/Desistance/Satisfaction/Regret	≥1yr follow-up	Chart-documented outcomes: continuation rates, complications (expulsion, infection, perforation), bleeding profiles, pain, and documented satisfaction.			Overall LARC continuation at 12 months: 92%. Continuation at 24 months: 74% (implant), 80% (IUD). Bleeding changes common: 42% implant, 37% IUD. Pelvic pain: 5%. No cases of perforation; infection rates <1%. Satisfaction documented in ~80% of cases.		The research was supported by the Investigator-Initiated Studies Program of Organon and by Maternal and Child Health Bureau T71MC00009, T71MC30799, and 5T71MC242101000 LEAH training grants.	"No conflicts" declaration		Summary Retrospective multisite chart review of 203 gender-diverse adolescents and young adults (ages 13–26; mean age ~17.7) receiving LARC for menstrual suppression. Continuation rates were high (92% at 12 months, ~75–80% at 24 months). Bleeding changes were the most common side effect; pelvic pain and infections were rare. Satisfaction was high when documented. Relevance for Guidelines The find…	0
10.1037/fam0000987	Policy/Legal	Abreu, Roberto L. and Sostre, Jules P. and Gonzalez, Kirsten A. and Lockett, Gabriel M. and Matsuno, Em and Mosley, Della V.	2022	Impact of Gender-Affirming Care Bans on Transgender and Gender Diverse Youth: Parental Figures' Perspective.	Journal of Family Psychology	36	5	643-652	USA	Qualitative	Qualitative, cross-sectional online survey.	N=134 parental figures reporting on their TGD adolescents (<18 years). Sample demographics: 74% White; 8% Latinx; 5% Black/African American; 4% Asian; others smaller. 75% identified as mothers. Median age of youth not directly reported but described as “adolescents.”	Community or Convenience Sample,Internet	Recruited via online survey distributed through advocacy and support networks for parents of TGD youth. Eligible if parent/guardian of a TGD adolescent (<18 years). Analysis included 134 parental figures across 37 U.S. states.	Policy/legal	Proposed and enacted U.S. state-level bans on gender-affirming healthcare for minors.			Mental Health (individual),Gender dyphoria/body satisfaction/body image,Psychosocial functioning (relational)	Baseline/Cross sectional	Open-text survey responses analysed thematically. Parental figures described their children’s mental health and wellbeing in the context of exposure to proposed or enacted GAHC bans.				Worsened mental health: Reports of increased depression, heightened anxiety, and suicidal ideation. Gender dysphoria: Exacerbation of dysphoria, including unsafe coping behaviours (self-harm, disordered eating). Psychosocial wellbeing: Youth felt less safe and more exposed to stigma, discrimination, and violence. Loss of care: Inability to access treatment led to deterioration in wellbeing.	No mention of funding (no funding section in paper)	No mention of COI		Summary Qualitative analysis of 134 U.S. parental figures’ reports on their TGD adolescents. Parents described that proposed or enacted bans on GAHC worsened their children’s health, including increased depression, anxiety, suicidality, heightened gender dysphoria, unsafe coping strategies, and reduced sense of safety. Relevance for Guidelines The findings support SAHCS recommendations for equita…	0
10.1016/j.jpag.2022.10.007	Menstrual Suppression	Alaniz, V. I. and Sheeder, J. L. and Whitmore, G. T. and Wilde, M. D. and Hutchens, K. J. and Nokoff, N. J. and Reirden, D. H. and Huguelet, P. S.	2023	Menstrual Suppression in Adolescent and Young Adult Transgender Males	Journal of Pediatric & Adolescent Gynecology	36	2	116-121	USA	Cross-sectional or Obervational Cohort	Retrospective cohort using medical record review with no control group	N=220; ages 10–24, median age 15.8 (range 11.5–23.2). Majority under 18, but outcomes not stratified by age.	Specialist gender clinic	Retrospective review of patients from a tertiary children’s hospital gender programme (2015–2021). Inclusion: transgender males and assigned female at birth non-binary youth aged 10–24 who were prescribed menstrual suppression or testosterone.	Menstrual Suppression / Hormonal Contraception	Testosterone (various routes/doses) Norethindrone acetate (NETA) Depot medroxyprogesterone acetate (DMPA) Depot leuprolide Levonorgestrel IUD Etonogestrel implant Combined oral contraceptives		Internal: Comparisons across menstrual suppression methods and testosterone-only groups for time to amenorrhea.	Physical health	≥1yr follow-up	Outcome timing: ≥1 yr (follow-up up to 24 months; primary outcome median time to amenorrhea reported within 6 months). Details of outcome assessment: Chart documentation of menstrual history, time to cessation of menses, unintended pregnancies, contraceptive counselling, and sexual history documentation.			Median time to cessation of menses: 182 days overall. Testosterone alone: 151 days. NETA: 78 days. Depot leuprolide: 77 days. DMPA alone: 182 days. <50% achieved amenorrhea within 6 months. Unintended pregnancies: rare, not quantified in main text. Contraceptive counselling and sexual history inconsistently documented.		None reported.	Full declaration	Author 6 is a consultant for Neurocrine Biosciences, Inc.	Summary Retrospective chart review of 220 transgender male and AFAB non-binary adolescents and young adults (ages 10–24, median 15.8). Menstrual suppression was most commonly attempted with testosterone alone or in combination with agents such as norethindrone acetate, DMPA, or depot leuprolide. Median time to amenorrhea varied by method (77–182 days), and fewer than half achieved cessation withi…	1
10.1542/peds.2020-042762	Psychosocial	Allen, Sarah Dahlgren ; Tollit, Michelle A; McDougall, Rosalind; Eade, Donna; Hoq, Monsurul; Pang, Ken C;	2021	A Waitlist Intervention for Transgender Young People and Psychosocial Outcomes	Pediatrics	148	2	e2020042762	Australia	Mixed Methods	Mixed-methods, quasi-experimental with historical controls.	FASST survey cohort: N=142 youth (8–17 yrs; exact distribution not given in abstract). Historical waitlist control cohort: N=120 (same service; pre-FASST). Qualitative interview subsample: N=14 FASST attendees.	Specialist gender clinic	Conducted at the Royal Children’s Hospital Gender Service (Melbourne). Participants were youth (8–17 yrs) on the waitlist for gender-affirming care. Eligible families were invited to the First Assessment Single-Session Triage (FASST) clinic while waiting for multidisciplinary assessment. Historical controls were matched youth referred before FASST implementation.	Family (Lack of) Support / Family therapy	First Assessment Single-Session Triage (FASST) program — a single-session, 3-hour, psychoeducational and skills-based intervention delivered to transgender and gender diverse youth and their caregivers while waiting for gender-affirming medical care.	checked	Historical control cohort (N=120) from the same clinic before FASST implementation; outcomes compared with FASST attendees.	Mental Health (individual),Psychosocial functioning (relational),Global functioning/QoL	<1yr follow-up	Baseline psychosocial measures were completed immediately before attending the FASST session. Follow-up assessments were collected post-intervention (within 1–2 weeks, at next clinic contact). Child and parent reports included the Children’s Depression Inventory (CDI), Revised Children’s Manifest Anxiety Scale (RCMAS-2), Child Behavior Checklist (CBCL), Youth Self-Report (YSR), and Child Health U…		checked	– Depression scores decreased significantly from baseline to follow-up (SMD ≈ –0.24). – Anxiety scores decreased (SMD ≈ –0.14). – Quality of life improved (SMD ≈ +0.39). – Compared with historical controls, FASST participants had lower anxiety (p ≈ .02) and trend-level lower depression (p ≈ .07). • Improvements maintained at 3-month follow-up for subset (n = 8).	Participants reported feeling validated and supported; greater sense of control and hope; families reported improved communication and reduced stress during waiting period.	Supported by Women’s and Children’s Hospital Foundation Grant #2018-R15.	"No conflicts" declaration	The authors declare no conflicts of interest.	Single-session intervention reduced psychological distress but uses historical controls; measurement tools not specified in file — confirm in methods section. Short-term follow-up only. Summary: Australian mixed-methods study (8–17 yrs) evaluating the FASST clinic at a specialist gender service. Compared with historical controls, youth attending FASST showed modest reductions in depression and an…	2
10.1007/s43032-021-00561-y	Fertility	Amir, Hadar and Perl, Liat and Barda, Shimi and Lantsberg, Daniel and Becker, Anat Segev and Israeli, Galit and Azem, Foad and Oren, Asaf	2022	Adolescent Transgender Females Present Impaired Semen Quality That Is Suitable for Intracytoplasmic Sperm Injection Even Before Initiating Gender-Affirming Hormone Treatment.	Reproductive sciences	29	1	260-269	Israel	Cross-sectional or Obervational Cohort	Retrospective quantitative cohort, record review.	N = 25 transgender female adolescents, age 14–18 (mean 16.2 ± 1.38). All but 2 at Tanner stage 5; one Tanner 3, one Tanner 4. 73 semen samples provided (median 3 per participant). Clinical characteristics: 20% ASD, 16% ADHD, 24% depression/anxiety, 28% reported tucking, 24% cannabis use. One individual with azoospermia; 83% had ≥1 abnormal semen parameter.	Specialist gender clinic	Adolescents referred from the Israeli Pediatric Gender Dysphoria Clinic, Tel Aviv Sourasky Medical Center, for fertility preservation between June 2013–October 2020. Inclusion: transgender female adolescents prior to GAHT. Exclusion: one individual with prior GnRHa + estradiol exposure (stopped 9 months before FP).	Fertility related	Fertility preservation (sperm cryopreservation) prior to GAHT.	checked	WHO 2010 reference values for semen quality in general population (no cis adolescent control group available).	Physical health	Baseline/Cross sectional	WHO 2010 semen analysis criteria: volume, concentration, total sperm count, motility, morphology. Post-thaw semen quality assessed for adequacy of ART (IUI, IVF, ICSI).			Median semen values significantly lower than WHO reference: volume 1.46 vs 3.2 mL; concentration 28 vs 64 × 10⁶/mL; motility 51.6% vs 62%; morphology 2% vs 14% (all p < 0.001). Abnormalities: teratozoospermia 72%, hypospermia 52%, oligozoospermia 28%, azoospermia 4%. Post-thaw median total motile sperm count 0.17 × 10⁶/vial; 87.7% of samples only adequate for ICSI, 6.8% IVF, 5.5% IUI. No signific…		“No external funding was either sought or obtained for this study.”	"No conflicts" declaration		Summary Retrospective cohort of 25 transgender female adolescents (14–18) in Israel undergoing sperm cryopreservation before GAHT. Semen quality was markedly impaired compared to WHO reference values, with high rates of teratozoospermia, hypospermia, and oligozoospermia. Post-thaw semen was mostly only suitable for ICSI. Relevance for Guidelines The findings support SAHCS recommendations that fer…	1
10.1016/j.jadohealth.2025.03.011	Psychosocial	Amos, Natalie and Grant, Ruby and Lin, Ashleigh and Hill, Adam O. and Pang, Ken C. and Skinner, S. Rachel and Cook, Teddy and Carman, Marina and Bourne, Adam	2025	Mental Health and Wellbeing Outcomes Among Trans Young People in Australia Who Are Supported to Affirm Their Gender	The Journal of adolescent health : official publication of the Society for Adolescent Medicine	77	1	51–58	Australia	Cross-sectional or Obervational Cohort	Quantitative cross-sectional survey	n = 1,697 trans participants, ages 14–21 (M ≈ 16–17); 56% aged 14–17 Gender: 72% nonbinary, 24% trans men, 4% trans women Sexual orientation: Bisexual (22%), pansexual (20%), queer (15%), gay/lesbian (18%), others (25%) Ethnicity: 91% born in Australia; 6% English-speaking countries; 4% non-English-speaking countries Residence: Outer-suburban (54%), regional (28%), rural/remote (12%) Education: 5…	Community or Convenience Sample	Target group: Transgender and gender-diverse youth desiring social, medical, or legal affirmation Recruitment type: Community-based (targeted social media ads; LGBTQA+ community orgs)	Social transition,Family (Lack of) Support / Family therapy	Exposure: Feeling supported to affirm gender (social, legal, medical) versus denied/delayed/controlled access			Mental Health (individual)	Baseline/Cross sectional	Suicidality/self-harm: adapted YRBS items (past-year) Psychological distress: K10 Anxiety: GAD-7 Happiness: Subjective Happiness Scale Homelessness and harassment: self-report (past 12 months or lifetime)			Suicidality: Support to affirm medically (aOR 0.49), legally (aOR 0.36), or socially (aOR 0.56) linked to reduced suicidal ideation; medical/legal support also lowered suicide attempts. Self-harm: Support (medical aOR 0.52; legal 0.41; social 0.64) reduced recent self-harm. Mental health: Support across all domains lowered distress (K10) and anxiety (GAD-7), and improved happiness (SHS). Homeless…		“This work was supported by Victorian Government Department of Premier and Cabinet, the New South Wales Department of Health, the Australian Capital Territory Office for LGBTIQ+ Affairs, and SHINE SA (with support from the Office of the Chief Psychiatrist in South Australia). AL is funded by an NHMRC Investigator Grant (#2010063). Secondary analyses reported in this article were made possible by …	"No conflicts" declaration		Summary: This study documents the relationship between support for gender affirmation and wellbeing outcomes among Australian trans youth. Cross-sectional survey of 1,697 participants (ages 14–21; 56% under 18) found that feeling supported to affirm socially, legally, or medically was associated with lower suicidality, self-harm, distress, anxiety, harassment, and homelessness, and with greater h…	0
10.3390/jcm11071943	Surgery Only	Aquino, Nelson J and Boskey, Elizabeth R and Staffa, Steven J and Ganor, Oren and Crest, Alyson W and Gemmill, Kristin V and Cravero, Joseph P and Vlassakova, Bistra	2022	A Single Center Case Series of Gender-Affirming Surgeries and the Evolution of a Specialty Anesthesia Team.	Journal of clinical medicine	11	7	1943	USA	Case Series (N > 5 only)	Retrospective single-center case series	Chest reconstruction: N=177, ages 15–33 (median 18); 65 (37%) <18 Patients coming for chest reconstruction surgery identified themselves mostly as trans masculine N=163 (92.1%) and non-binary N=8 (4.5%); There were N=5 trans women (2.8%) and N=1 cis woman (0.5%). The median age of patients was 18 with the youngest patient presenting at 15 years old. ALSO, but not relevant: Genital surgeries: N=27…	Record Review,Other clinic	Retrospective case series of patients undergoing gender-affirming chest and genital surgeries at Boston Children’s Hospital (Jan 2017–Aug 2020). Patients identified via EMR and anesthesia/billing records using ICD-10 F64 and CPT codes. All procedures performed at pediatric academic hospital by multidisciplinary gender surgery team. The following Current Procedural Terminology (CPT) codes were inc…	"Surgery (top, bottom, or other)"	Chest reconstruction (mastectomy) in a pediatric academic hospital also genital surgery (phalloplasty, metoidioplasty, and vaginoplasty) but none carried out on minors			Physical health,Adverse Events	<1yr follow-up	Data sources: anesthesia records, PACU data, inpatient records, EMR. Measures: ASA classification, PACU pain scores (0–10 scale grouped low/med/high), opioid equivalents (mg/kg morphine), PONV, adverse events (hematoma, airway event), ICU admission, readmissions. Timing: immediate perioperative period, PACU, inpatient up to discharge, and 30-day readmissions.			Total cases: 204 (177 chest, 27 genital). Chest reconstruction (65 minors): adverse events = 7 hematomas (4%), 1 airway event (0.6%); readmission 2.8% (n=5, mostly hematomas); median LOS 1.1 days; PACU pain low in 64%, high in 6%; inpatient PONV 11.3%. "The rate of same-day discharge to home was 18.6% compared to floor at 81.4%. Median hospital length of stay in the chest reconstructions was 1.1 …	(more refleciton and discussion not actual qual research) Development of specialized anesthesia team (GASPP). Gender Affirming Surgical Perioperative Program (GASPP) Themes of continuity, affirming care, interdisciplinary planning, reducing misgendering and distress, creation of guidelines. "Mastectomy, sometimes referred to as “top surgery” is an important step for female-to-male (FTM) transgend…	“This research received no external funding.”	"No conflicts" declaration	“The authors declare no conflict of interest.”	Notes: Chest surgery included patients as young as 15; genital surgeries limited to ≥18. Highlights perioperative safety and very low complication rates in chest surgery for minors. Summary: US single-center case series (N=204, 2017–2020; 177 chest, 27 genital). 65 chest cases performed under age 18 (median age 18). Chest reconstruction in adolescents had low complication rates (4% hematoma, <1% …	0
10.1177/13591045221091652	Surgery Plus	Arnoldussen, Marijn and Hooijman, Evelien C and Kreukels, Baudewijntje Pc and de Vries, Annelou Lc	2022	Association between pre-treatment IQ and educational achievement after gender-affirming treatment including puberty suppression in transgender adolescents.	Clinical child psychology and psychiatry	27	4	1069-1076	Netherlands	Cross-sectional or Obervational Cohort	Prospective cohort using clinician-administered IQ assessments and later educational records with no control group	N=72 (45 trans men, 27 trans women). Mean age baseline: 12.8 yrs (range 10.7–16.9). Mean start PS: 13.8 yrs; mean duration PS 2.4 yrs. Start GAH: mean 16.2 yrs; surgery mean 18.7 yrs. Post-treatment educational evaluation at mean 20.4 yrs (range 18.6–23.8). Attrition: 72/119 included (61%); reasons included loss of contact, refusal, incomplete data.	Specialist gender clinic,Record Review	Conducted at Amsterdam UMC CEGD. Adolescents referred before 2010, diagnosed with GD under DSM-IV-TR, started PS <17, followed by GAH and gender-affirming surgery (mastectomy, hysterectomy, vaginoplasty). 119 eligible; 72 participated. Non-participants more likely not to live with biological parents and to start PS later.	Puberty Blockers,GAH (Hormones),"Surgery (top, bottom, or other)"	“Adolescents who started with puberty suppression before the age of 17 years followed by gender-affirming hormonal treatment and gender-affirming surgery (vaginoplasty, hysterectomy, or mastectomy).”			Global functioning/QoL,Tx trajectory/Persistance/Desistance/Satisfaction/Regret,Other	≥1yr follow-up	Pre-treatment IQ: WISC-III or WAIS-III. Emotional/behavioural problems: CBCL and YSR. Family functioning: Family Assessment Device (FAD). Educational achievement: dichotomised (vocational vs higher vocational/academic). Analyses: logistic regression controlling for externalising problems and GAHT start age.			Mean total IQ: 100.3 (SD 15.1). Educational achievement: 37 vocational (51.4%), 35 higher (48.6%). Strong positive correlation IQ → education (Nagelkerke R=0.71). Each IQ point ↑ odds of higher education: OR 1.17 (95% CI 1.07–1.28, p<0.001). Verbal IQ OR 1.16; performance IQ OR 1.13. Gender not a modifier.		“The author(s) received no financial support for the research, authorship, and/or publication of this article.”	"No conflicts" declaration	“The author(s) declared no potential conflicts of interest with respect to the research, authorship, and/or publication of this article.”	Notes: Educational outcomes better than Dutch age-matched peers; suggests PS+GAH did not impair cognitive development trajectory. Summary: Dutch longitudinal cohort (N=72). Found strong linear association between pre-treatment IQ and later educational achievement after PS, GAH, and surgery. Suggests GAMC does not disrupt IQ–education link, with participants achieving equal or better educational o…	4
10.1089/lgbt.2020.0494	Surgery Plus	Arnoldussen, Marijn and van der Miesen, Anna I R and Elzinga, Wieteke S and Alberse, Anne-Marie E and Popma, Arne and Steensma, Thomas D and de Vries, Annelou L C	2022	Self-Perception of Transgender Adolescents After Gender-Affirming Treatment: A Follow-Up Study into Young Adulthood.	LGBT health	9	4	238-246	Netherlands	Cross-sectional or Obervational Cohort	Retrospective single-arm cohort using self-report measures with no control group	N=70 adolescents (49 trans men, 21 trans women). Mean age pretreatment 14.65 (SD 2.08, range 11.2–19.7). Mean age at surgery 19.23 (SD 1.27, range 17.9–24.8). Mean age post-treatment assessment 20.70 (SD 1.49). Mean follow-up after surgery: 1.47 years (range 0.7–4.8). Attrition: Out of 179 eligible with surgery + follow-up, only 70 had complete pretreatment SPPA data (39% participation).	Specialist gender clinic	Adolescents referred to Amsterdam UMC CEGD between 2000–2013. Eligible if they met DSM-IV-TR criteria for GID, received puberty suppression + subsequent GAH, and had undergone gender-affirming surgery ≥6 months prior. Pretreatment SPPA available for 70/179 eligible. Participation rate 39%.	GAHC general or unspecified,GAH (Hormones),"Surgery (top, bottom, or other)",Puberty Blockers	Adolescents received puberty suppression and subsequent gender-affirming hormone treatment, and were assessed at least 6 months after gender-affirming surgery (mastectomy, hysterectomy, vaginoplasty, metoidioplasty, or phalloplasty, depending on legal requirements and patient choice)			Mental Health (individual),Psychosocial functioning (relational),Gender dyphoria/body satisfaction/body image	≥1yr follow-up	Details of outcome assessment: Self-Perception Profile for Adolescents (SPPA), Dutch version. Domains: scholastic competence, social acceptance, athletic competence, physical appearance, behavioural conduct, close friendship, global self-worth. Analyses: multilevel modelling with confounder adjustment (gender, age, puberty suppression at baseline, IQ, living situation). Timing note: Pretreatment …			Physical appearance: significant improvement (+2.66, p<0.001). Global self-worth: significant improvement (+2.23, p<0.001). Behavioural conduct: improved for trans men only (p=0.003). Other domains (scholastic, social, athletic, close friendship) stable; none worsened.		No funding was received for this article.	"No conflicts" declaration	“No competing financial interests exist.”	Cohort limited to those with available pretreatment SPPA (39% of eligible). IQ higher in participants than nonparticipants. Summary: Dutch longitudinal cohort (N=70). Adolescents treated with puberty suppression, GAH, and surgery showed significant improvements in physical appearance and global self-worth into young adulthood, with other domains stable. Relevance for Guidelines: Supports evidence…	3
10.1001/jamapediatrics.2022.3424	Surgery Only	Ascha, Mona and Sasson, Daniel C and Sood, Rachita and Cornelius, Jeremy W and Schauer, Jacob M and Runge, Adariane and Muldoon, Abigail L and Gangopadhyay, Noopur and Simons, Lisa and Chen, Diane and Corcoran, Julia F and Jordan, Sumanas W	2022	Top Surgery and Chest Dysphoria Among Transmasculine and Nonbinary Adolescents and Young Adults.	JAMA pediatrics	176	11	1115-1122	USA	Controlled Intervention	Prospective matched cohort; surgical vs no-surgery comparison	Surgical group: N=36, mean age 18.8 (SD 3.1), 15 <18; transmasculine (89%), nonbinary (8%), other (3%). Control group: N=34, mean age 18.3 (SD 2.3), 9 <18; transmasculine (79%), nonbinary (18%), other (3%). Overall N=70 analysed; age range 13–24.	Specialist gender clinic,Other clinic	Recruited 2019–2021. Surgical patients identified at pre-op consults at Northwestern Memorial, University of Illinois at Chicago, or Lurie Children’s Hospital. Controls recruited from Lurie’s Gender and Sex Development Program. Inclusion: DFAB, transmasculine or nonbinary, ages 13–24, English-speaking. Parental consent for <18. Matched by age ±1 year and testosterone use ±1 year. "Control patient…	"Surgery (top, bottom, or other)"	“Patients in the surgical cohort underwent gender-affirming mastectomy; surgical technique was at the discretion of the surgeon” Health care professionals tailored surgical techniques to each individual’s presentation and preferences.	checked	Matched controls (DFAB, TGNB, aged 13–24, attending gender clinic, not undergoing top surgery during study period)	Gender dyphoria/body satisfaction/body image,Mental Health (individual),Psychosocial functioning (relational),Physical health,Adverse Events	<1yr follow-up	Chest Dysphoria Measure (CDM): 17-item validated tool; range 0–51; higher = worse dysphoria. Transgender Congruence Scale (TCS): 12-item validated scale with subscales (appearance congruence, gender identity acceptance). Body Image Scale (BIS): 30-item measure; higher = more dissatisfaction. Parental Support of Gender Variance–Child/Youth (PSGV-CY): baseline only. Timing: baseline and 3 months. S…			Primary (CDM) and secondary (TCS, BIS) outcomeswere analyzedwithinverse probability treatmentweighting (IPTW)propensity score analysis with linear regression adjustments. Subgroup analysis was conducted for patients younger than 18 years. This was done because the age of 18 is often used as an arbitrary cutoff for insurance companies for reimbursing care. IPTW model: CDM: –25.58 points (95% CI –2…		“Northwestern University Clinical and Translational Sciences Institute is funded in part by a Clinical and Translational Science Award grant from the National Institutes of Health (UL1TR001422). This study was also funded by the Plastic Surgery Foundation and American Association of Pediatric Plastic Surgery Combined Research grant.”	Full declaration	“Dr Simons reported consultant fees from CVS Caremark for reviewing medication protocols for gender dysphoria, outside the submitted work. Dr Chen reported grants from the National Institutes of Health (R01 HD097122, R01 MH123746, and R01 HD082554), outside the submitted work. Dr Jordan reported grants from the Plastic Surgery Foundation during the conduct of the study. No other disclosures were …	Prospective matched cohort of adolescent top surgery outcomes. Limitations: small N, imbalance between groups despite IPTW, high attrition (11 lost to follow-up), 3-month follow-up only. One-year data collection ongoing. Summary: US multicenter prospective matched cohort (N=70, ages 13–24; 24 <18). Gender-affirming top surgery was associated with large improvements in chest dysphoria, gender cong…	3
10.1210/jendso/bvaf105	Fertility	Aslam, Mohsin and Norup, Pernille Badsberg and Haahr, Mette Ewers and Pagsberg, Anne Katrine and Giraldi, Annamaria and Jørgensen, Niels and Main, Katharina Maria	2025	Semen Cryopreservation and Semen Quality in Transfeminine Adolescents Prior to Hormone Therapy	Journal of the Endocrine Society	9	8	bvaf105	Denmark	Cross-sectional or Obervational Cohort	Retrospective observational cohort	N=58 transfeminine adolescents, median age 15.9 yrs (range 11.4–19.3). 23 (39.7%) opted for semen cryopreservation; 17 had no prior GAHT/self-medication and were included in semen quality analysis. One excluded for congenital adrenal hyperplasia.	Specialist gender clinic,Record Review,Registry Cohort	National retrospective cohort of 58 transfeminine adolescents <18 years referred to the Department of Growth and Reproduction, Rigshospitalet, Copenhagen, between January 2016–December 2022. Data retrieved from clinical records of those evaluated by a multidisciplinary team prior to initiation of GAHT.	Fertility related	Offered semen cryopreservation prior to initiation of puberty blockers (GnRHa) and/or oestrogen as part of gender-affirming care; compared those opting for vs against cryopreservation.	checked	Adolescents who opted out of semen cryopreservation served as the comparator group.	Physical health,Tx trajectory/Persistance/Desistance/Satisfaction/Regret	<1yr follow-up	Semen analyses conducted per WHO 2021 standards: semen volume, sperm concentration, total sperm count, motility classes. Reproductive hormones (FSH, LH, testosterone, inhibin-B, estradiol) measured using accredited lab assays (AutoDelfia, Atellica, LC-MS/MS, ELISA).			Among 58 adolescents, 39.7% attempted semen cryopreservation. Those who did were older (median 16.4 yrs vs 15.8 yrs; p<.05), more advanced in puberty (Tanner G5 vs G3; p<.05), and had larger testis volumes (20 mL vs 8 mL; p<.05). In 17 hormone-naïve individuals: median sperm concentration 11.1×10⁶/mL (0.02–163); total sperm count 17.8×10⁶ (0.1–214.2); progressive motility 46% (8–74). 57% had conc…		The study has received financial support from Sygeforsikringen ‘danmark’ (grant number 2022-0153) and the Danish Health Authority (grant number 03-0802-296).	"No conflicts" declaration		Single national tertiary service; 3 individuals self-medicated with prior GAHT excluded from hormone analyses. Free public access to fertility preservation; data reflect all Danish referrals <18 yrs 2016–2022. 25. Summary Retrospective national cohort from Denmark (2016–2022) of 58 transfeminine adolescents <18 yrs referred for GAHT. 39.7% attempted semen cryopreservation prior to treatment. Thos…	0
10.1093/humrep/deae155	Surgery Plus,Fertility	Asseler JD, de Nie I, van Rooij FB, Steensma TD, Mosterd D, Verhoeven MO, Goddijn M, Huirne JAF, van Mello NM	2024	Transgender persons’ view on previous fertility decision-making and current infertility: a qualitative study	Human Reproduction	39	9	2032–2042	Netherlands	Qualitative	Qualitative interview study using semi-structured interviews with no control group	N=21 (11 trans men, 10 trans women). Mean age at interview: 29.2 (SD 3.1). All received gender-affirming treatment in adolescence prior to 2014 (when sterilisation was required by law for legal gender recognition). Age at start PS: mean 15.3 yrs. Age at start hormones: mean 16.8 yrs. Age at gonadectomy: mean 19.6 yrs. Attrition: 22 approached, 1 declined (fertility topic too painful).	Specialist gender clinic	Recruited from participants of another long-term follow-up study at Amsterdam UMC CEGD. Asked during scheduled clinical visits if willing to participate. Purposeful sampling by assigned sex at birth to balance trans men/women.	Fertility related,Puberty Blockers,GAH (Hormones),"Surgery (top, bottom, or other)",GAHC general or unspecified	“Participants had received gender-affirming treatment in adolescence prior to 2014, including puberty suppression, gender-affirming hormones, and gonadectomy, resulting in infertility. Fertility preservation options were rarely discussed or available at that time due to legal requirements for sterilization.”			Mental Health (individual),Psychosocial functioning (relational),Tx trajectory/Persistance/Desistance/Satisfaction/Regret	≥1yr follow-up	>5 yrs since treatment; participants reflecting as adults at mean age 29 Semi-structured one-on-one interviews (13–46 min, average 23). Thematic analysis (Braun & Clarke reflexive TA). Six themes identified: (i) personal considerations at time of decision, (ii) external considerations (counselling, protocols, legal constraints), (iii) current vision on past decisions, (iv) coping with infertility…		checked		Gender affirmation prioritised over fertility; infertility seen as unavoidable. Barriers included procedures felt dysphoric (e.g., masturbation for cryopreservation). Some had no desire for children, others uncertain. Legal sterilisation requirement accelerated decisions. Current feelings: varied — from acceptance to deep grief and regret. Coping strategies: avoidance, acceptance, psychological s…	None declared	Full declaration	“The authors declare no conflict of interest. However, M.G. and M.O.V. declare that their department (reproductive medicine) have received research and educational grants from Guerbet, Merck, and Ferring (all location VUmc), outside the scope of the submitted work. J.A.F.H. received grants from ZonMw, Samsung, and PlantTec Medical GmbH outside the scope of the submitted work. F.B.v.R. received gr…	Notes: First qualitative exploration of long-term infertility in Dutch TGD adults treated as adolescents under sterilisation law. Sample binary only, recall bias and choice-supportive bias noted. Summary: Dutch qualitative study (N=21, mean age 29). All treated with GAHT and gonadectomy in adolescence before 2014 sterilisation requirement. Found that most prioritised gender affirmation over ferti…	0
10.1515/jpem-2023-0237	GAHT Only	Baines, Hayley K and Connelly, Kara J	2023	A prospective comparison study of subcutaneous and intramuscular testosterone injections in transgender male adolescents.	Journal of pediatric endocrinology & metabolism : JPEM	36	11	1028-1036	USA	Cross-sectional or Obervational Cohort	Prospective controlled intervention, subcutaneous versus intramuscular testosterone injections	N=26; ages 14–18 (median 15.5). Assigned female at birth, TGD adolescents starting testosterone.	Specialist gender clinic	Recruited from Doernbecher Gender Clinic (OHSU), Jan 2018–Mar 2019. Eligibility: TGD adolescents aged 14–18 starting testosterone therapy. Excluded if prior testosterone use. Participants either randomized (n=18) or selected injection type (n=8). 110 eligible, 26 consented. Four lost to follow-up (3 returned later for care, 1 not returned).	GAH (Hormones)	Subcutaneous (SQ) vs. intramuscular (IM) testosterone injections; testosterone-naïve TGD adolescents initiating gender-affirming hormone therapy.	checked	Internal comparison subcutaneous versus intramuscular testosterone injections	Global functioning/QoL,Adverse Events,Physical health,Gender dyphoria/body satisfaction/body image	<1yr follow-up	Outcome timing: <1 yr (3 and 6 months); optional 9-month crossover (preference only). Details of outcome assessment: Serum testosterone (peak and trough, 3 and 6 months). PedsQL™ (Teen Report 13–18 version 4.0). Masculinizing effects questionnaire (non-validated; acne, hair, muscle, menses, clitoral enlargement). Medication experience questionnaire (ease, pain, fear, satisfaction). Labs: CBC, CMP…			Trough testosterone levels comparable between groups at 3 and 6 months. Peak levels higher in IM group (3 months p=0.012; 6 months trend p=0.095). Masculinization scores increased significantly overall (p<0.001), no significant group difference. Quality of life (PedsQL™) showed no significant change baseline–6 months (p=0.71), no group differences. BMI increased overall, not significantly differe…		Dr. Baines was supported by NIH T32 Training Grant 4T32HD007497-15. The study was supported by the Pediatric Endocrine Society Rising Star Award, the OHSU Tartar Trust Fellowship and the OHSU Department of Pediatrics for biostatistics support. OHSU Oregon Clinical & Translation Research Institute REDCap grant support UL1TR002369.	"No conflicts" declaration		Summary Prospective US study with 26 TGD adolescents (14–18), comparing SQ vs. IM testosterone for 6 months. Outcomes: serum testosterone, masculinisation, QoL, safety, medication experience. Both routes safe and effective, no major differences in masculinisation or QoL; IM produced higher peak testosterone. Mild SQ-specific skin irritation reported. Participants highlighted injection preferences…	0
10.1080/26895269.2023.2286269	Psychosocial	Barras, Abby and Jones, Bethany A.	2024	"[He] can be supportive, but at times I feel he is ashamed of me": Understanding the relationship between parental support and quality of life amongst trans and gender diverse youth in the UK	International Journal of Transgender Health	25	1	90-101	United Kingdom	Cross-sectional or Obervational Cohort	Cross-sectional mixed-methods online survey. [pmc.ncbi.nlm.nih](https://pmc.ncbi.nlm.nih.gov/articles/PMC10846468/)	n = 140, ages 11–19 (M = 15.9, SD = 1.9) Gender identity: 49% male, 26% female, 21% nonbinary, 4% other/prefer not to say	Community or Convenience Sample	Target group: Trans and gender diverse adolescents and young people aged 11–19 Context: UK-based online survey, recruited through LGBTQ+ youth support organisation Mermaids	Family (Lack of) Support / Family therapy	Perceived parental support (affirming vs. non-affirming, consistent vs. inconsistent)			Psychosocial functioning (relational)	Baseline/Cross sectional	Parental support: PAGES-Y scale (Perceived Parental Attitudes of Gender Expansiveness for Youth) Quality of Life: Good Childhood Index (items on life satisfaction, family satisfaction, happiness)		checked	Key Quantitative Results: Perceived affirming support from Parent 1 (primary parent) positively correlated with overall QoL (r = .49, p < .001) and satisfaction with family relationships (r = .67, p < .001). Perceived affirming support from Parent 2 (secondary parent) positively correlated with QoL (r = .43, p < .001) and family satisfaction (r = .51, p < .001). Key Qualitative Themes (for open-e…		The author(s) reported there is no funding associated with the work featured in this article	"No conflicts" declaration	“The authors declare that they have no conflict of interest. The first author is a former employee at Mermaids.”	Summary Mixed-methods survey, UK; 140 TGD youth aged 11–19. Higher perceived parental support was strongly associated with better quality of life and family satisfaction. However, qualitative accounts revealed that support was often conditional, inconsistent, or undermined by misgendering. Lack of knowledge limited affirmation, while access to accurate information sometimes shifted parental attit…	0
10.1016/j.jpurol.2023.02.006	Fertility	Barrera, Ellis and Locks, Rachel and Kremen, Jessica and Yu, Richard	2023	Fertility preservation in transfeminine adolescents using TESE at the time of Histrelin Acetate subcutaneous implant placement: A Case Series.	Journal of pediatric urology	19	5	540.e1-540.e5	USA	Case Series (N > 5 only)	Retrospective quantitative chart review.	N=10. All assigned male at birth. Nine identified as female, one as non-binary. Age range 12y5m–16y8m (median 14y5.5m). Median Tanner stage IV (range III–V). Testicular volume mean 13.2 cc (range 8–17). Ethnicity: 90% not Hispanic/Latino, 10% unknown. Race: 80% White, 10% Black/African American, 10% Other. 90% had private insurance, 10% Medicaid	Specialist gender clinic	Retrospective review of transfeminine adolescents presenting to Boston Children’s Hospital Gender Multispecialty Service (GeMS) between 2010–2022. Eligible if undergoing fertility preservation via testicular sperm extraction (TESE) at the time of histrelin acetate (Supprelin) implant placement for pubertal suppression.	Fertility related,Puberty Blockers	Combined testicular sperm extraction (TESE) for fertility preservation at the time of histrelin acetate (Supprelin) subcutaneous implant placement for GnRH agonist-based pubertal suppression.			Adverse Events,Physical health	Baseline/Cross sectional	Successful sperm retrieval documented for storage (binary outcome). Preoperative indicators collected: testicular volume (Prader orchidometer), Tanner stage, endocrine markers (testosterone, LH, FSH, inhibin B). Timing: performed at initiation of GnRH agonist therapy.			Successful sperm retrieval in 10/10 patients (100%). Median age at FP/SP: 14y5.5m (range 12y5m–16y8m). Median time from GnRHa prescription to FP/SP: 2 months (range 2–5). Mean testicular volume: 13.2 cc (SD 3.38, range 8–17). Median Tanner stage IV (range III–V). Average testosterone: 301.6 ng/dL (SD 173). LH mean 3.0 (SD 1.25), FSH mean 3.33 (SD 1.71), Inhibin B mean 208.5 (SD 87.4).		No mention of funding	No mention of COI		Summary Case series of 10 transfeminine adolescents (12–16y) undergoing TESE for fertility preservation at time of histrelin implant for puberty suppression at Boston Children’s Hospital. All had successful sperm retrieval. Average testicular volume 13.2 cc; median Tanner stage IV. TESE combined with histrelin implant is feasible and avoids delays in starting gender-affirming treatment. TESE also…	0
10.3389/fendo.2022.873508	Fertility	Barrett, Francesca and Shaw, Jacquelyn and Blakemore, Jennifer K and Fino, Mary Elizabeth	2022	Fertility Preservation for Adolescent and Young Adult Transmen: A Case Series and Insights on Oocyte Cryopreservation.	Frontiers in endocrinology	13		873508	USA	Case Series (N > 5 only)	Retrospective quantitative case series.	44 AYA trans men contacted fertility center (2009–2021). 35/44 (80%) had a consultation; median age at consult 16 (range 10–24). 20/35 (57%) pursued oocyte cryopreservation; median age at cycle start 16 (range 12–25). 19/20 (95%) underwent successful oocyte aspiration; median 22 oocytes retrieved (range 5–59), median 15 mature oocytes frozen. Attrition: 9/44 never consulted; 15/35 consulted but d…	Other clinic	All AYA trans men (10–25 years) who contacted NYU Langone Fertility Center between 2009–2021. Referral sources primarily in-house clinicians (77%), especially pediatric/adolescent physicians and psychologists at NYU. Records reviewed for all contacts, consultations, and OC cycles.	Fertility related	“Oocyte cryopreservation cycles for adolescent and young adult trans men, including ovarian stimulation protocols, monitoring methods, trigger protocols, and retrieval under dysphoria-protection protocols.”			Adverse Events,Mental Health (individual),Other	<1yr follow-up,≥1yr follow-up	Chart review of contact, consult, and cryopreservation records. Ovarian stimulation protocols: antagonist (95%), low-dose down-regulation (5%). Monitoring: 82% transabdominal ultrasound, 18% transvaginal if required. Outcomes: number of oocytes retrieved, maturity (MII, MI, GV), complications, cycle cancellations.			20/35 pursued OC; 21 completed cycles (1 canceled). Median 22 oocytes retrieved, 15 mature oocytes frozen. ≥20 oocytes retrieved in 67% of cycles. 4 cycles with mild/moderate OHSS (all outpatient care). 2 patients required repeat cycles for low initial maturity. Patients with prior testosterone exposure successfully completed OC (n=2). Importantly, all patients with prior testosterone exposure we…	Expedited initiation of testosterone was a priority for many, influencing decision to defer fertility preservation. Dysphoria-protection protocols (transabdominal monitoring, gender-neutral language, binder use during retrieval) were feasible and well tolerated.	No mention	"No conflicts" declaration	“The authors declare that the research was conducted in the absence of any commercial or financial relationships that could be construed as a potential conflict of interest.”	Notes: Case series of OC in trans male adolescents/young adults to date. Identified barriers: cost, distress, prioritisation of testosterone, lack of standardised guidance. Summary: US case series (44 AYA trans men, 2009–2021). Of 35 consults, 20 pursued oocyte cryopreservation. Retrieval successful in 19/20 with high oocyte yield (median 22 retrieved, 15 mature). Mild OHSS in 4 cycles. Dysphoria…	3
10.1002/pbc.31284	PB+ GAHT	Baskaran, Charumathi and Roberts, Stephanie A. and Barrera, Ellis and Pilcher, Sarah and Kumar, Riten	2024	Venous thromboembolism in transgender and gender non-binary youth is rare and occurs in the setting of secondary risk factors: A retrospective cohort study	Pediatric blood & cancer	71	11	e31284	USA	Cross-sectional or Obervational Cohort	Retrospective compartative cohort study using medical record review	1,860 transgender and gender non-binary youth (ages 13–25) followed in a pediatric transgender health clinic 942 (50.6%) were receiving GAHT at analysis (mean age at initiation 16.8 ± 1.9 years) 639 on testosterone, 303 on estrogen 918 not on GAHT	Specialist gender clinic,Record Review	TNB adolescents and young adults followed in a quaternary pediatric institution’s transgender health clinic. Identified through institutional database and ICD-9/10 codes; inclusion required diagnosis of gender dysphoria and at least one follow-up visit at the BCH transgender health clinic.	Puberty Blockers,GAH (Hormones)	Exposure = use of GAHT; comparison = no GAHT. Secondary query: presence of congenital thrombophilia.	checked	GAHT vs no GAHT at time of TBE	Physical health	≥1yr follow-up	ICD-9/10 codes for thrombotic events, validated by chart review Thrombophilia work-up (factor V Leiden, prothrombin G20210A, protein S deficiency, etc.) for subset with personal/family history			VTE occurred in 3/1,860 youth (0.16%), across 5 total thrombotic events. Only 1 individual (0.1%) developed VTE while on GAHT, compared to 2 (0.2%) before GAHT; no statistical difference (p=0.62). All VTE events occurred in the presence of secondary risk factors (central line, thoracic outlet syndrome, obesity + oral contraceptive use). 10 individuals diagnosed with congenital thrombophilia; 2 st…		National Institute of Health, Grant K08HD100595; Loan Repayment Program to Stephanie Roberts.	"No conflicts" declaration		Summary: This large US cohort study of transgender and gender non-binary youth (ages 13–25) found that venous thromboembolism (VTE) was very rare, with only three cases identified among 1,860 patients. Only one event occurred while on GAHT, and all were linked to secondary risk factors such as central venous line use, thoracic outlet syndrome, or oral contraceptives with obesity. No VTE was obser…	0
10.2196/39094	Psychosocial	Bauermeister, Jose A and Choi, Seul Ki and Bruehlman-Senecal, Emma and Golinkoff, Jesse and Taboada, Arianna and Lavra, Joshua and Ramazzini, Lionel and Dillon, Fred and Haritatos, Jana	2022	An Identity-Affirming Web Application to Help Sexual and Gender Minority Youth Cope With Minority Stress: Pilot Randomized Controlled Trial	J. Med. Internet Res.	24	8	e39094	USA	Controlled Intervention	Pilot quantitative randomized controlled trial.	N = 270 (135 imi, 135 control). Ages 13–19 ( mean 16.5 ), 78 % racial/ethnic minority, 35 % non-binary. Follow-up N = 244 ( 90 % retention ). No adverse events reported.	Internet	SGM youth aged 13–19 years ( mean 16.5 ± 1.5 ) recruited via Instagram ads ( Oct–Nov 2021 ). Eligibility included self-identified sexual or gender minority status, US residence, English literacy, and device access. Verification steps checked IP location and duplicate entries. Waiver of parental consent approved for privacy. Participants randomised 1:1 to imi (intervention) or resource-only contro…	Individual Therapy/Counseling	“imi, a web application designed to improve mental health by supporting LGBTQ+ identity affirmation, coping self-efficacy, and coping skill practice. Modules covered gender identity, queer identity, stress and coping, and internalized homophobia and transphobia. Participants engaged self-paced with informational resources, exercises, and peer stories.”	checked	Active control received “asterix,” a resource-only version of the imi site linking to LGBTQ+ mental-health resources.	Mental Health (individual),Psychosocial functioning (relational),Global functioning/QoL	<1yr follow-up	baseline and 4-week follow-up Participants completed web-based self-report surveys at baseline (pre-intervention) and 4 weeks after randomisation. Primary outcome: Stress Appraisal Measure for Adolescents (challenge, threat, resources subscales). Secondary outcomes: Brief COPE (subscales for coping skills), LGB Positive Identity Measure, Coping with Discrimination Scale ( internalisation ), Thwar…			• Treatment arm showed greater improvement in challenge appraisals (d = 0.25, P = .008). • Higher instrumental support (d = 0.24, P = .005), positive reframing (d = 0.27, P = .02), and planning (d = 0.26, P = .02). • Anxiety and depression reduced across both arms (no between-arm difference). • Engagement ≥ 10 minutes or > 10 pages predicted greater stress and coping gains (P < .01).	Participants valued peer stories and affirming content; requested more topics ( relationships, interactive features ). Some felt tool most useful for youth early in identity exploration.	Supported by Hopelab Foundation, CenterLink, and It Gets Better Project.	Full declaration	“imi is a progressive web application codeveloped by Hopelab, CenterLink, and It Gets Better Project. All organizations were involved in development; none stand to profit financially. Several authors employed by Hopelab Foundation.”	Limitations: Short follow-up; self-report outcomes; small sample for subgroup effects; no no-treatment control; limited 13–14 age representation. Summary: US pilot RCT (N = 270, ages 13–19) comparing imi vs resource-only control. Intervention improved stress appraisals and coping skills, particularly with higher engagement; mental-health symptoms improved in both arms. Acceptability high ( > 90 %…	1
10.1007/s00787-020-01640-2	Surgery Plus	Becker-Hebly I, Fahrenkrug S, Campion F, Richter-Appelt H, Schulte-Markwort M, Barkmann C	2021	Psychosocial health in adolescents and young adults with gender dysphoria before and after gender-affirming medical interventions: a descriptive study from the Hamburg Gender Identity Service	European Child & Adolescent Psychiatry	30	11	1755–1767	Germany	Cross-sectional or Obervational Cohort	Prospective clinical cohort with internal comparison of four intervention groups using clinician and self-report measures	Study design (dropdown): Longitudinal cohort (descriptive, baseline + ~2 yr follow-up) Sample(s): N=75 adolescents/young adults (64 trans male, 11 trans female). Age at baseline: mean 15.6 yrs (range 11.2–18.0). Age at follow-up: mean 17.4 yrs (range 11.9–21.0). Subgroups: psychosocial only (n=21), puberty suppression (n=11), GAH only (n=32), GAH+GAS (n=11). Attrition: Of 434 referred, 270 had co…	Specialist gender clinic	Adolescents referred to Hamburg Gender Identity Service (2013–2017). Eligible if ≥11 yrs, DSM-5 GD diagnosis, persistent GD, request for GA interventions, no severe psychiatric problems, consent for baseline + follow-up.	GAHC general or unspecified,GAH (Hormones),"Surgery (top, bottom, or other)",Puberty Blockers	“Participants were allocated into four groups: (1) psychosocial interventions only; (2) puberty suppression with GnRHa; (3) GAH (estrogen/testosterone), some with prior GnRHa; (4) GAH and GAS, mainly mastectomy.”			Mental Health (individual),Gender dyphoria/body satisfaction/body image,Psychosocial functioning (relational),Global functioning/QoL	≥1yr follow-up	Timing note: Baseline at intake, follow-up mean 21 months later (range 7–49 months). Details of outcome assessment: Psychological functioning: Youth Self-Report (YSR) or Adult Self-Report (ASR); internalizing, externalizing, total problems (T-scores vs German norm). Global functioning: Children’s Global Assessment Scale (CGAS), clinician-rated. Quality of life: Kidscreen-27 (under 18) or SF-8 (≥1…			Psychological functioning: All groups scored above norm at baseline. At follow-up: psychosocial-only group still impaired; puberty suppression group within norm for externalizing problems; GAH and GAH+GAS groups closer to norm but still above on total/internalizing. Quality of life: All groups below norm at baseline. At follow-up: puberty suppression group within norm for both mental and physical…		None reported	"No conflicts" declaration	“On behalf of all authors, the corresponding author states that no conflict of interest exists.”	Overrepresentation of trans male participants (85%). Selection bias possible (adolescents referred for surgery may have been more stable). Small subsamples limit interpretation; descriptive only. Summary: German longitudinal clinic cohort (N=75, 2013–2017). Psychosocial-only group showed persistent impairment. Medical intervention groups (PS, GAH, GAH+GAS) improved toward population norms, especi…	9
10.1080/26895269.2023.2252418	Psychosocial	Belmont, Natasha and Cronin, Timothy J and Pepping, Christopher A	2023	Affirmation-support, parental conflict, and mental health outcomes of transgender and gender diverse youth.	International journal of transgender health	25	1	50-62	Australia	Cross-sectional or Obervational Cohort	Quantitative cross-sectional online parent survey. [pmc.ncbi.nlm.nih](https://pmc.ncbi.nlm.nih.gov/articles/PMC10846426/)	N = 63 parents (M age = 45.7 years) of transgender and gender diverse youth aged 11–17 (M = 14.3). Youth gender identities: ~35% trans girls, 30% trans boys, ~27% nonbinary, remainder gender fluid, genderqueer, or agender.	Internet	Australian parents recruited online via TGD parent support groups and social media (Facebook, Twitter, LinkedIn). Eligible if sharing parenting (intact or separated families) of a TGD child aged 11–17.	Family (Lack of) Support / Family therapy	Parents reported on their support for their child’s gender affirmation (social, legal, medical), barriers to affirmation (controlled, denied, delayed, supported), and coparenting dynamics (agreement, conflict).			Mental Health (individual)	Baseline/Cross sectional	Affirmation support: 3 items each for parent and coparent, rated on 7-point Likert (α = .95 parent, α = .94 coparent). Coparenting conflict: Coparenting Relationship Scale, subscales of Agreement and Undermining (α = .83–.91). Depressive symptoms: Parent-report Short Mood and Feelings Questionnaire (13 items, α = .94).			Affirmation support: Higher support predicted lower depressive symptoms (β = −0.42, p = .002). Coparenting conflict: Not significantly associated with depressive symptoms (β = .22, p = .088). Model explained 22.8% of variance in depressive symptoms (R² = .23). Discrepancies between parent and coparent support were generally low, but greatest for medical affirmation. Barriers to affirmation report…		This research was funded by La Trobe University.	"No conflicts" declaration		Summary Cross-sectional parent-report survey of 63 Australian parents of TGD youth aged 11–17. High parental support for affirmation (social, legal, medical) strongly predicted fewer depressive symptoms in youth, while association with coparenting discrepancy in support was not significant. Relevance for Guidelines Family involvement: Strong evidence that parental support is protective for mental…	0
10.1007/s12671-024-02421-7	Psychosocial	Bluth, Karen and Bryce, Ani and Lathren, Christine R. and Park, Jinyoung and Pflum, Samantha and Clayton, Matthew	2024	Reducing suicide ideation in transgender adolescents with mindful self-compassion: An open trial	Mindfulness	15	12	3107-3128	USA and Canada	Cross-sectional or Obervational Cohort	Mixed-methods pilot trial of mindfulness intervention	n = 35 enrolled; n = 34 completed (two cohorts). Ages 13–17 (M ≈ 14.9). Gender: ~52% transmasculine, 33% nonbinary, 15% transfeminine. Race/ethnicity: ~77% White; others included Latinx, Black, multiracial. Baseline history: 79% ever self-harmed; ~21% ever attempted suicide.	Specialist gender clinic,Community or Convenience Sample,Internet	Target group: Transgender and gender-diverse (TGD) adolescents reporting at least minimal suicidal ideation. Context: Evaluating a tailored Mindful Self-Compassion for Transgender Adolescents (MSC-TA) online course Community-based (targeted social media, school listservs) with outreach to gender-affirming clinics/providers (screening by study staff)	Peer group therapy or psychosocial	Intervention: Mindful Self-Compassion for Teens for transgender adolescents (MSC-TA) — 8 sessions (twice weekly for 4 weeks, 90 min), Zoom-based, tailored scenarios for TGD youth; safety monitoring by a study psychologist during sessions; optional 2-hour caregiver workshop. Key skills: mindfulness, self-kindness, “soften-soothe-allow”, managing the inner critic, values work; home practice via app…			Mental Health (individual)	<1yr follow-up	DSI-SS (suicidality; baseline, mid-program [safety], post, 2-mo follow-up). PROMIS Pediatric Depression (baseline, post, follow-up). SCS-Y (self-compassion), CD-RISC-10 (resilience). INQ (thwarted belongingness, perceived burdensomeness). GMSRM subscales: non-affirmation, internalized transphobia, pride, community connectedness. Selected BNSSI-AT items (NSSI history/likelihood). Feasibility/accep…		checked	Suicidality: Large reductions in suicidal ideation from baseline to 2-month follow-up; 36% reported no ideation at follow-up; 54% showed improvement. Self-compassion & moderation: Self-compassion increased and moderated change in suicidality — greater increases linked to larger decreases in ideation (significant time × self-compassion interaction). Thwarted belongingness also moderated trajectori…		This study was supported by a grant from the American Foundation for Suicide Prevention #SRG-1–024-20 and a stakeholder voucher from North Carolina Translation and Clinical Studies Institute #SE2111. American Foundation for Suicide Prevention,SRG-1-024- 20,Karen Bluth,North Carolina Translational and Clinical Sciences Institute,University of North Carolina at Chapel Hill,SE2111,Karen Bluth	Full declaration	Author KB declares she receives compensation to teach and train teachers in the MSC-T curriculum. All other authors have no conflicts to declare.	Summary Mixed-methods open trial, USA/Canada; 34 TGD adolescents (13–17) completed an 8-session online self-compassion course. Suicidal ideation decreased substantially to 2-month follow-up; self-compassion increased, and its growth moderated reductions in ideation. Depression decreased modestly; resilience increased. Acceptability was high after protocol adjustments; feasibility criteria were me…	1
10.1177/07435584211062126	Psychosocial	Bluth, Karen; Lathren, Christine; Clepper-Faith, Melissa; Larson, Lillia M; Ogunbamowo, Daniel O; Pflum, Samantha;	2021	Improving Mental Health Among Transgender Adolescents: Implementing Mindful Self-Compassion for Teens	Journal of adolescent research	38	2	271-302	USA	Mixed Methods	Single-arm pre–post pilot.	N = 13 (13–17 yrs; M = 15.8). 8 trans boys, 3 trans girls, 2 non-binary. Attrition = 2 (15%) post-test; 5 (38%) at 3 months.	Community or Convenience Sample	Recruited online and through community organisations serving transgender youth. Participants eligible if aged 13–17 years, identified as transgender, and fluent in English. Sessions delivered virtually (Zoom) during the COVID-19 pandemic. No exclusions for comorbidity. 13 enrolled; 11 completed post-test; 8 completed 3-month follow-up.	Peer group therapy or psychosocial	Eight-week Mindful Self-Compassion for Teens (MSCT) program, adapted for transgender youth, delivered online by trained facilitators (two clinical psychologists and a peer co-facilitator). Sessions taught self-kindness, common humanity, and mindfulness skills with gender-affirming examples and inclusive language.			Mental Health (individual),Psychosocial functioning (relational),Global functioning/QoL	<1yr follow-up	Timing note: 8-week intervention + 3-month follow-up (≈ 4 months total interval). Details of outcome assessment: Self-compassion: Self-Compassion Scale–Short Form (SCS-SF) Depression: CES-D-10 Anxiety: GAD-7 Belongingness & Perceived Burdensomeness: Interpersonal Needs Questionnaire–Revised for Adolescents (INQ-R-A) Resilience: Connor-Davidson Resilience Scale (CD-RISC-10) Life satisfaction: Stud…		checked	Self-compassion: ↑ significantly (pre M 2.36 → post 3.12, p < 0.01). Depression: ↓ significantly (pre M 21.5 → post 13.4, p < 0.05). Anxiety: ↓ significantly (pre M 12.7 → post 8.2, p < 0.05). Belongingness: ↑ (p < 0.05); Burdensomeness: ↓ (p < 0.05). Resilience & Life satisfaction: ↑ nonsignificant trend. All gains maintained at 3 months for those with follow-up data (n = 8).	Open-ended feedback emphasised peer connection, safety, and reduced isolation. Participants valued LGBTQ-affirming facilitation.	This work was supported by the University of North Carolina at Charlotte Faculty Research Grant Program.	Full declaration	“The authors declare no conflicts of interest. Dr. Bluth receives royalties from Guilford Press for a book on mindfulness and self-compassion for teens.”	Small sample; no control group; online delivery during COVID-19 may limit generalisation. Effect sizes moderate-to-large (Cohen’s d 0.5–0.8). Summary: US community-based pre-post study (N = 13, 13–17 yrs). Eight-week gender-affirming Mindful Self-Compassion program significantly reduced depression and anxiety and improved self-compassion and sense of belonging, maintained at 3 months. Relevance f…	3
10.1093/jsxmed/qdaf206	PB+ GAHT	Boogers S. and McDonnell, Elena S. F. and de Vries, Annelou L. C. and den Heijer, Martin and van Trotsenburg, A. S. Paul and Hannema, Sabine E. and Wiepjes, Chantal M.	2025	Feminine figures: body image and physical characteristics in trans women after puberty suppression and subsequent estradiol therapy	The journal of sexual medicine	22	10	1902-1909	Netherlands	Cross-sectional or Obervational Cohort	Cross-sectional comparative (early vs late PB before GAHT)	N = 42 adolescent trans women (AMAB), all initiated puberty suppression <18 yrs; 23 began in early puberty (Tanner G2–3) and 19 in late puberty (Tanner G4–5). Mean age at participation 20.0 ± 1.6 yrs; mean GAHT duration 4.2 ± 1.6 yrs.	Specialist gender clinic	Trans women (AMAB), initiated puberty suppression <18 yrs, later on estradiol.	Puberty Blockers,GAH (Hormones)	Puberty suppression with GnRHa (Decapeptyl-CR, Pamorelin). Subsequent estradiol (oral 17β-estradiol 2–6 mg; some temporarily on EE or high-dose estradiol to reduce height).	checked	Internal: early PS (Tanner G2–3) vs late PS (Tanner G4–5).	Gender dyphoria/body satisfaction/body image,Mental Health (individual),Physical health	≥1yr follow-up	(Cross-sectional follow-up in young adulthood) Timing: Mean age at participation 20.0 ± 1.6 yrs; mean GAHT duration 4.2 ± 1.6 yrs after puberty suppression in adolescence. Measures: Body Image Scale (BIS): validated instrument assessing satisfaction with body characteristics (score range 1 = satisfied to 5 = dissatisfied). Rosenberg Self-Esteem Scale (RSE): standard 10-item measure of global self…			Mean total BIS score 2.4 ± 0.6 (satisfied). Anthropometrics (smaller height, BMI, waist, feet) correlated with higher body satisfaction. Early PS group scored higher on most BIS items, with significantly better satisfaction on voice (β –1.4, 95% CI –1.9 to –0.8). Early PS group also had higher self-esteem (RSE), though overall self-esteem was average. 83% reported neutral-to-satisfied body image;…		No funding to declare	"No conflicts" declaration		Summary: This Dutch cross-sectional study of 42 trans women who began PS <18 and later initiated estradiol found overall neutral-to-satisfied body image and average self-esteem. Early initiation was associated with higher body satisfaction—particularly regarding voice—and better self-esteem, consistent with prevention of testosterone-driven traits. Feminine anthropometric characteristics correlat…	0
10.1210/clinem/dgae573	PB+ GAHT	Boogers, Lidewij S. and Sardo Infirri, Sebastiaan A. and Bouchareb, Asma and Dijkman, Benthe A. M. and Helder, Danithsia and de Blok, Christel J. M. and Liberton, Niels P. T. J. and den Heijer, Martin and van Trotsenburg, A. S. Paul and Dreijerink, Koen M. A. and Wiepjes, Chantal M. and Hannema, Sabine E.	2025	Variations in Volume: Breast Size in Trans Women in Relation to Timing of Testosterone Suppression	The Journal of clinical endocrinology and metabolism	110	5	e1404–e1410	Netherlands	Cross-sectional or Obervational Cohort	Cross-sectional comparative study of trans women after GAHT, grouped by timing of prior puberty suppression (early, late, or none)	N = 60 trans women after ~4.5 ± 1.7 years of GAHT: Adolescent PS starters: n=40 who began PS <18 (23 early PS, Tanner G2–3; 17 late PS, Tanner G4–5). Adult starters (no PS): n=20 (baseline data from adult clinical trial arm). Age range 17–57; adolescent PS groups assessed in young adulthood; adult group older by design.	Specialist gender clinic	Eligibility (PS groups): started PS <18; ≥2 and ≤10 years on estradiol; no breast augmentation, no progesterone use. Adult group: started GAHT ≥18; ≥2 and ≤10 years estradiol; gonadectomy done; exclusions included BMI>30, augmentation	Puberty Blockers,GAH (Hormones)	Puberty suppression (PS): GnRHa (triptorelin) begun in early (G2–3) or late (G4–5) puberty; continued with estradiol. GAHT (estradiol): oral 17β-estradiol (2–6 mg/day) with step-up dosing for adolescent starters; some temporary ethinyl estradiol (EE 100–200 µg) or high-dose estradiol used briefly to reduce growth. Adult starters: anti-androgen (cyproterone or spironolactone) + estradiol; no adole…	checked	Internal comparator: early PS vs late PS vs adult starters; analyses adjusted for fat percentage and GAHT duration.	Gender dyphoria/body satisfaction/body image,Mental Health (individual),Physical health	≥1yr follow-up	3D breast volume with Artec Leo scanner; analysis via Artec Studio 15, GOM Inspect Pro 2021, Autodesk Meshmixer; cup sizes categorized (≤A <150 mL; B 150–299; C 300–449). Breast satisfaction questionnaire (5 Likert items on size/shape/symmetry/nipple size/shape; derived from De Blok et al.). Rosenberg Self-Esteem Scale (RSE) (Dutch translation); low 0–14, average 15–24, high 25–30. Anthropometric…			Median breast volume overall 115 mL (IQR 68–203) ≈ cup <A. No significant differences between early PS vs late PS vs adult starters after adjustment for fat % and GAHT duration. EE exposure (temporary 100–200 µg) associated with smaller breast volume (≈ −71 to −81 mL after/before fat% adjustment) vs no EE. Satisfaction: 68% satisfied with breast size (57% early PS, 76% late PS, 70% adult); no cor…		No funding to declare.	"No conflicts" declaration		Summary: In this Dutch cohort, timing of adolescent PS (early vs late) did not translate into larger adult breast volume after ~4–5 years on estradiol; volumes were also similar to adult starters without PS. Despite modest median volume (<A cup), most participants reported satisfaction. Temporary ethinyl estradiol use was associated with smaller volumes. Relevance for guidelines: Families should …	0
10.1210/clinem/dgad750	PB+ GAHT	Boogers, Lidewij Sophia and Reijtenbagh, Sterre Johanna Petronella and Wiepjes, Chantal Maria and van Trotsenburg, Adrianus Sarinus Paulus and den Heijer, Martin and Hannema, Sabine Elisabeth	2024	Time Course of Body Composition Changes in Transgender Adolescents During Puberty Suppression and Sex Hormone Treatment.	The Journal of clinical endocrinology and metabolism	109	8	e1593-e1601	Netherlands	Cross-sectional or Obervational Cohort	Retrospective longitudinal cohort using medical record review	N = 548 total adolescents Trans boys: n = 380 Trans girls: n = 168 Mean age at PS start: ~14.2 yrs (boys 14.4, girls 14.1). Early pubertal (Tanner 2–3): n = 71 boys, 92 girls. Late pubertal (Tanner 4–5): n = 309 boys, 76 girls.	Specialist gender clinic,Record Review	Inclusion: <18 yrs at PS initiation, GD per DSM-IV/5, ≥1 DXA scan during first 3 years of PS or GAHT. Exclusion: use of progestins/cyproterone, no eligible DXA, missing Tanner stage.	Puberty Blockers,GAH (Hormones)	Puberty suppression (PS): GnRHa (triptorelin IM/SQ, q4wks or q10–12wks). GAHT: Boys: IM testosterone esters, dose escalated q6mo to adult. Girls: oral estradiol, sometimes ethinylestradiol for growth suppression. GnRHa continued during GAHT until gonadectomy.	checked	Internal comparisons: Early vs late pubertal initiation of PS. Within-subject longitudinal (baseline vs 1–3 yrs). Sub-analyses by hormone concentrations during GAHT. Cisgender NHANES reference data for Z-scores.	Physical health	≥1yr follow-up	DXA scans (Hologic Delphi/Discovery A). Whole-body fat, lean, android/gynoid ratios; Z-scores relative to sex assigned at birth using NHANES. Anthropometrics (height, weight, BMI, SDS). Serum sex steroids (LC-MS/MS for estradiol, Architect immunoassay/LC-MS/MS for testosterone). Sub-analyses by Tanner stage at PS start and hormone concentrations during GAHT.			Puberty suppression (PS): Trans boys: Lean mass Z-scores ↓ −0.32 in year 1, stable thereafter. Fat mass Z-scores ↑ +0.47 over 3 yrs, mostly year 1. Android/gynoid fat ratio ↑ +0.07 over 3 yrs. Greater lean mass decline in late vs early starters (−0.49 diff). Trans girls: Lean mass Z-scores ↓ −1.13 over 3 yrs. Fat mass Z-scores ↑ +1.06 over 3 yrs. Late pubertal starters had greater lean mass decli…		None received.	"No conflicts" declaration		Summary: This Dutch cohort study (n=548) provides insight into how body composition shifts over time with PS and GAHT. In trans boys, lean mass fell and fat mass rose modestly during PS but reversed quickly with testosterone, with most changes occurring in the first year; by 3 years, body composition resembled cis boys. In trans girls, PS produced ongoing lean mass loss and fat gain over 3 years,…	0
10.1210/clinem/dgae574	PB+ GAHT	Boogers, Lidewij Sophia and Sikma, Boukje Teatske and Bouman, Mark-Bram and van Trotsenburg, Adrianus Sarinus Paulus and den Heijer, Martin and Wiepjes, Chantal Maria and Hannema, Sabine Elisabeth	2025	Shaping the Skeleton: Impact of GnRH Analogue and Sex Hormone Therapy on Skeletal Dimensions in Transgender Individuals	The Journal of clinical endocrinology and metabolism	110	5	e1411–e1419	Netherlands	Cross-sectional or Obervational Cohort	Cross-sectional comparative study using existing DXA and retrospective medical record data (four comparison groups: early PS + GAHT, late PS + GAHT, GAHT-only, untreated)	243 individuals: 121 AMAB, 122 AFAB, current age range 18–28	Record Review,Specialist gender clinic	Amsterdam Cohort of Gender Dysphoria (ACOG) database; contains data from individuals who were seen at the Center of Expertise on Gender Dysphoria in Amsterdam from 1972 to December 2018. Participants were included in the current study if a dual- energy x-ray absorptiometry (DXA) scan was performed between the age of 18 to 28 years.	Puberty Blockers,GAH (Hormones)	Early PS + GAHT Definition: Puberty suppression (PS) initiated at early Tanner breast (B) or genital (G) stage 2 or 3, followed by at least 2 years of GAHT. Characteristic: Individuals started PS early in puberty, then began long-term hormone therapy. Late PS + GAHT Definition: PS started at a later stage—Tanner B or G stage 4 or 5—followed by at least 2 years of GAHT. Characteristic: Individuals…	checked	Early PS + GAHT, Late PS + GAHT, GAHT-only, and untreated groups	Physical health	≥1yr follow-up	DXA scan ages 18–28, outcome measured after ≥2 years of treatment Skeletal dimensions: shoulder width, pelvic width, pelvic inlet, pubic symphysis width, interischial distance DXA scan, measured by blinded researcher, validated method	checked		'- AMAB, Early PS: Shoulder width −1.3 cm (95% CI: −2.1, −0.5; p < 0.05) vs untreated AMAB; similar to untreated AFAB (0.1 cm, 95% CI: −0.9, 1.1). Pelvic inlet +1.0 cm (95% CI: 0.7, 1.4; p < 0.05); Pubic symphysis width +0.9 cm (95% CI: 0.7, 1.2; p < 0.05); Interischial distance +2.2 cm (95% CI: 1.5, 3.0; p < 0.05); All compared to untreated AMAB, and similar to untreated AFAB. - AMAB, Late PS: P…		None	"No conflicts" declaration		Transfeminine youth with early puberty suppression (Tanner 2–3) plus estrogen had slightly narrower shoulders and significantly more “female‑like” pelvic inlet, pubic symphysis width, and interischial distance than untreated AMAB, closely resembling untreated AFAB pelves. Transmasculine youth with early puberty suppression plus testosterone showed a smaller, more “male‑like” pelvic inlet and pubi…	0
10.1093/ejendo/lvad116	PB+ GAHT	Boogers, Lidewij Sophia and van der Loos, Maria Anna Theodora Catharina and Wiepjes, Chantal Maria and van Trotsenburg, Adrianus Sarinus Paulus and den Heijer, Martin and Hannema, Sabine Elisabeth	2023	The dose-dependent effect of estrogen on bone mineral density in trans girls.	European journal of endocrinology	189	2	290-296	Netherlands	Cross-sectional or Obervational Cohort	Retrospective comparative cohort using medical record review	N = 87 trans girls, initiated PS and GAHT before age 18. Groups: 59 on regular estradiol (step-up to 2 mg). 13 on high-dose estradiol (6 mg). 15 on ethinyl estradiol (100–200 µg). Mean age at start PS: 13.5 yrs; mean age at GAHT start: 15.8 yrs.	Specialist gender clinic,Record Review	Trans girls treated with GnRHa ≥12 months before GAHT; eligible if <18 at GAHT start and had DXA within 6–24 months of estrogen treatment. Exclusions: mixed/short-term regimens; no DXA scan.	Puberty Blockers,GAH (Hormones)	GnRHa (≥12 months, triptorelin 3.75 mg q4w or 11.25 mg q12w). GAHT regimens: Regular estradiol step-up to 2 mg/day. High-dose estradiol 6 mg/day. Ethinyl estradiol 100–200 µg/day (growth-reductive).	checked	Internal comparator: regular 2 mg estradiol vs 6 mg vs EE.	Physical health,Adverse Events	<1yr follow-up,≥1yr follow-up	DXA scans (lumbar spine, hip, femoral neck). Serum estradiol, testosterone, LH, FSH, vitamin D. Mixed model regression adjusted for baseline BMD and BMI.			During PS: lumbar spine HAZ scores decreased by −0.69 over ~2.3 yrs. During GAHT: Regular estradiol (2 mg): minimal BMD increase (LS +0.13, not reaching baseline PS). High-dose estradiol (6 mg): greater increase (LS +0.42), approaching baseline. Ethinyl estradiol: largest increase (LS +0.68), surpassing baseline. Hip/femoral neck: EE group showed significantly greater increases than regular group…		This research did not receive any funding.	"No conflicts" declaration		Summary: This Dutch cohort compared different estrogen regimens following GnRHa in 87 trans girls. Regular 2 mg estradiol was insufficient for BMD recovery, while higher doses (6 mg estradiol or EE) restored lumbar spine and hip Z-scores to baseline. Findings support a dose-dependent relationship between estrogen exposure and bone accrual. Relevance for guidelines: Families should be counselled t…	3
10.1210/clinem/dgac349	PB+ GAHT	Boogers, Lidewij Sophia and Wiepjes, Chantal Maria and Klink, Daniel Tatting and Hellinga, Ilse and van Trotsenburg, Adrianus Sarinus Paulus and den Heijer, Martin and Hannema, Sabine Elisabeth	2022	Transgender Girls Grow Tall: Adult Height Is Unaffected by GnRH Analogue and Estradiol Treatment.	The Journal of clinical endocrinology and metabolism	107	9	e3805-e3815	Netherlands	Cross-sectional or Obervational Cohort	Retrospective comparative cohort using medical record review	N = 161 trans girls who started GnRHa <18 yrs, continued estradiol (regular or high-dose) until adult height. 88 with remaining growth potential (pubertal group); 73 had little/no growth potential at start (postpubertal group). Mean age at GnRHa start: ~13.5 yrs; mean age at GAHT start: 15–16 yrs. Tanner: varied (II–V).	Specialist gender clinic,Record Review	Drawn from Amsterdam Cohort of Gender Dysphoria (ACOG) database (retrospective review). Inclusion: GnRHa before age 18, use of estradiol, reached adult height (bone age ≥16 yrs or growth velocity <2 cm/yr). Exclusion: genetic disorders affecting growth, treatment discontinuation before adult height.	Puberty Blockers,GAH (Hormones)	Puberty suppression: GnRHa (triptorelin). GAHT: Regular estradiol (2 mg). High-dose estradiol (6 mg). High-dose ethinyl estradiol (100–200 µg) for growth reduction.	checked	Internal comparators: Regular-dose estradiol vs high-dose estradiol vs EE. Pubertal vs postpubertal initiation groups.	Physical health	≥1yr follow-up	Height: stadiometer every 3–6 months. Bone age: Greulich & Pyle method. Predicted adult height: BoneXpert. Adult height: measured once growth velocity <2 cm/yr or ≥18 yrs.			During GnRHa: growth velocity and bone maturation slowed; bone age lagged behind chronological age by ~1.6 yrs. During GAHT: growth velocity increased again. Adult height after regular-dose estradiol: 180.4 cm, close to target height, only ~1.5 cm below predicted adult height (likely due to overestimation of PAH). High-dose estradiol (6 mg): no meaningful effect on adult height compared to regula…		No funding acknowledgement section in paper	"No conflicts" declaration		Summar: This Dutch cohort (n=161) shows that GnRHa followed by estradiol generally has little effect on adult height in trans girls: final height was close to both predicted and target height. Growth-reductive regimens showed minimal impact — high-dose estradiol was ineffective, and high-dose ethinyl estradiol reduced height modestly (~3 cm) but is known from other populations to carry safety con…	4
10.1016/j.jadohealth.2023.04.029	Surgery Only	Boskey, Elizabeth R and Jolly, Divya and Kant, Jessica D and Ganor, Oren	2023	Prospective Evaluation of Psychosocial Changes After Chest Reconstruction in Transmasculine and Non-Binary Youth.	The Journal of adolescent health : official publication of the Society for Adolescent Medicine	73	3	503-509	USA	Pre-Post with No Control	Prospective single-surgeon cohort with no control group using repeated patient-reported outcome measures	Analytical sample: N=153, ages 15–35 (M=20.1, SD 4.2). Subgroups: 59 minors <18 (mean 16.7), 94 ≥18 (mean 22.1). Gender identity: 117 trans men (76%), 36 nonbinary/genderqueer/agender/other (24%). 79% on testosterone at baseline; majority White (90%), 14% Black, 4% Asian, 8% Hispanic/Latinx.	Specialist gender clinic	Recruited 2018–2022 through the Transgender Surgical Expectations (TSE) study, a single-surgeon prospective cohort at Boston Children’s Hospital. Eligibility: ages 15–35, AFAB, TMNB identity, English-speaking, no psychosis or memory impairment. Patients approached after multidisciplinary team review (medical + behavioural health) and external referral letter per WPATH v7 standards.	"Surgery (top, bottom, or other)"	“Gender-affirming chest reconstruction (bilateral mastectomy with or without nipple grafting) in transmasculine and nonbinary adolescents and young adults.”			Gender dyphoria/body satisfaction/body image,Psychosocial functioning (relational)	<1yr follow-up,≥1yr follow-up	Transgender Congruence Scale (TCS): 12 items; measures gender congruence, appearance congruence, identity acceptance. Chest Dysphoria Scale (CDS): 17 items; range 0–51; measures body, behaviour, social functioning related to chest dysphoria. Timing: baseline, 6 months, 1 year. Analysis: repeated measures ANOVA with Tukey’s HSD. The transgender congruence scale (TCS) [15] is a 12-item scale with t…			For those under 18: Gender congruence ↑ from 3.2 → 4.0 at 6m; 4.2 at 1y (p<.001). Appearance congruence ↑ from 2.8 → 4.2 at 6m & 1y (p<.001). Identity acceptance: NS change (3.9→3.9→4.2, p=.27). Chest dysphoria ↓ from 28.3 → 3.7 at 6m, 3.6 at 1y (p<.001). Total sample (N=153): Gender congruence ↑ from 3.1 → 4.2 at 6m & 1y (p<.001). Appearance congruence ↑ from 2.8 → 4.2 at 6m & 1y (p<.001). Ident…		Not specified	"No conflicts" declaration	“The authors have no conflicts of interest to declare.”	Notes: Single-center, single-surgeon, prospective cohort with validated measures at 3 timepoints. Majority White and insured; nonbinary sample relatively small. No control group. Summary: US prospective cohort (N=153, 2018–2022; 59 minors). Gender-affirming chest surgery significantly reduced chest dysphoria and improved gender congruence and appearance congruence at 6 and 12 months for both mino…	2
10.1016/j.jadohealth.2024.11.002	PB+ GAHT,GAHT Only	Boskey, Elizabeth R. and Scheffey, Kathryn L. and Pilcher, Sarah and Barerra, Ellis P. and McGregor, Kerry and Carswell, Jeremi M. and Kant, Jessica D. and Kremen, Jessica	2025	A Retrospective Cohort Study of Transgender Adolescents' Gender-Affirming Hormone Discontinuation	Journal of Adolescent Health	76	4	584–591	USA	Cross-sectional or Obervational Cohort	Retrospective quantitative cohort, record review. [pubmed.ncbi.nlm.nih](https://pubmed.ncbi.nlm.nih.gov/39818655/)	1,050 transgender adolescents accessing GAHT at a Gender Multispecialty Service (GeMS), <18 years at initiation. (full age range not provided). At the time of hormone initiation, the study population’s gender identities were 64% male, 31% female, and 6% nonbinary.	Specialist gender clinic	1,050 adolescents who had been on GAH for a minimum of 6 months, attending a Gender Multispecialty Service (GeMS).	GAH (Hormones),Treatment trajectory/Discontinution/Detrans	Initiation and continuation of GAH for at least 6 months			Tx trajectory/Persistance/Desistance/Satisfaction/Regret	≥1yr follow-up	Outcomes assessed longitudinally at last contact. Current users required documented GAH use within the past 12 months; past users were defined as discontinuing for ≥3 months; lost to follow-up was >12 months with no contact.			Discontinuation of GAH was rare. Across 3,087 person-years of follow-up (median 2.7 years, range 0.8–11.2), the overall discontinuation rate was 0.012 per person-year (95% CI 0.008–0.016). Of 1,050 eligible individuals, 20 (2%) discontinued GAH for more than three months before restarting, 37 (4%) discontinued without restarting, and 20 (2%) had unknown status at last contact. Fewer than 1% of th…		This project was partially funded by a Boston Children’s Hospital Faculty Development Grant to Dr. Kremen.	"No conflicts" declaration		Of 1,050 adolescents who had been on gender‑affirming hormones (GAH) for at least 6 months, 93% were still on GAH at last contact, 2% had stopped for ≥3 months and later restarted, and 4% had stopped without restarting; the overall discontinuation rate was about 0.012 per person‑year over median 2.7 years of follow‑up. Among those who stopped without restarting (n=37), the most common reasons wer…	0
10.1089/lgbt.2024.0079	Policy/Legal	Brandon-Friedman, Richard A. and Tabb, Ali and Imburgia, Teresa M. and Swafford, Tayon R. and Fortenberry, J. Dennis and Canada, Meredith and Donahue, Kelly L.	2025	Perspectives of Gender-Diverse Youth and Caregivers Facing Gender-Affirming Medical Intervention Bans	LGBT health	12	2	108–115	USA	Qualitative	Qualitative interviews within longitudinal cohort.	N = 16 gender-diverse youth (ages 12–18). Mean age = 14.8 yrs (SD = 1.98). Gender identities: 7 trans men, 4 trans women, others nonbinary/unspecified	Specialist gender clinic	Youth recruited after initiating intake or first medical consultation in 2022–2023. Part of a 2-year longitudinal study on GAHT impacts; this analysis used baseline semistructured interviews. Caregivers also interviewed, but only youth data included here.	Policy/legal	Context: access to gender-affirming medical interventions (puberty blockers, GAHT). Exposure: sociopolitical/legal environment (Indiana ban on GAHT for minors, 2023).			Mental Health (individual),Psychosocial functioning (relational)	<1yr follow-up	Direct effects of potential loss of GAHT/PS access: youth feared reversal of positive wellbeing, worried about being forced off hormones, and anticipated harm to mental/physical health. Hostile environment: constant negative media/social messaging; erosion of peer support and visibility in schools; heightened stigma and discrimination. Personal/social upheaval: some families moved or considered r…				Direct effects of losing access: Youth and caregivers anticipated or feared forced discontinuation or denial of puberty blockers/hormones, described worry about mental health deterioration and physical changes if treatment stopped, and some discussed rationing medication or planning out‑of‑state care as contingencies. Growing hostility toward gender‑diverse people: Participants felt public debate…	This work was supported by the Indiana University—Purdue University Indianapolis Office of the Vice Chancellor for Research.	"No conflicts" declaration		Summary: This study documents the lived experiences of US gender-diverse youth facing legislative bans on GAHT/PS. Qualitative interview study, Indiana, USA; 16 GDY (ages 12–18) and 16 caregivers. Families described fear of treatment withdrawal, worsening mental health, disrupted social networks, and increased stigma. Some also reported resilience and political mobilization. Relevance for guideli…	0
10.1007/s10803-022-05832-4	Psychosocial	Brandsma, Tessa and Visser, Kirstin and Volk, J. J. G. and Balleur van Rijn, Anne and Dekker, L. P.	2024	A Pilot Study on the Effect of Peer Support on Quality of Life of Adolescents with Autism Spectrum Disorder and Gender Dysphoria	Journal of autism and developmental disorders	54	3	997-1008	Netherlands	Pre-Post with No Control	Pre–post pilot group intervention.	N = 41 (mean age 17.8 ± 2.3 yrs; 23 AMAB [56%], 18 AFAB [44%]); 95% Western background. Attrition 17%. 43.9% had additional DSM-5 diagnoses (anxiety, depression, ADHD). 85% received concurrent individual therapy.	Other clinic	Participants were adolescents aged 12–23 with confirmed ASD and Gender Dysphoria (DSM-5) recruited from referrals to the SARR Center of Expertise for Autism, Rotterdam (2019–2021). Inclusion required IQ ≥ 80 and ability to attend group sessions. Exclusion criteria: active psychotic disorder, or untreated severe anxiety/depression. Participants gave informed consent (parental consent <18 yrs).	Peer group therapy or psychosocial	Peer support group for adolescents with ASD and GD consisting of nine monthly sessions addressing topics including gender identity exploration, social transition, ASD-related challenges, and relationships. The program followed clinical guidelines (Strang et al., 2018) and the American protocol (Strang et al., 2020), emphasizing psychoeducation, self-expression, and peer connection.			Psychosocial functioning (relational),Mental Health (individual),Global functioning/QoL	<1yr follow-up	≥ 1 yr (9-month intervention; pre–post at baseline and final session). Questionnaires administered to adolescents and parents at baseline (T1) and post-intervention (T2) after the ninth meeting. Adolescent measures: WHOQoL-BREF psychological subscale, SCL-90 (psychological complaints), CBSA self-esteem subscale, UGDS (gender dysphoria), and SRS-A (social responsiveness). Parent measure: KIDSCREEN…		checked	↑ Parent-reported psychological well-being (KIDSCREEN-27): t(16) = −2.39, p = .029, d = 0.58. • ↓ Psychological complaints (SCL-90): t(23) = 2.63, p = .015, d = 0.54. • No significant change in self-reported psychological well-being (WHOQoL-BREF). • ↑ Gender dysphoria (UGDS): z(25) = 3.05, p = .002, r = −.61. • No change in self-esteem or social responsiveness.	Adolescents described the group as a safe space, valued shared experience, and greater self-understanding; parents reported feeling more informed and supported.	None	"No conflicts" declaration	“All authors declare that they do not have conflicts of interest to disclose.”	Limitations: Non-controlled pre–post design; incomplete data due to ASD-related fatigue; heterogeneous gender stages; few cultural minorities; concurrent therapies confound attribution. Summary: Dutch pilot pre–post study (N = 41, 12–23 yrs) of a nine-session peer-support group for autistic adolescents with GD. Parent-rated well-being improved and psychological complaints decreased; self-rated Qo…	1
10.1136/archdischild-2022-324302	PB+ GAHT	Butler, Gary and Adu-Gyamfi, Kirpal and Clarkson, Kerry and El Khairi, Ranna and Kleczewski, Sara and Roberts, Alice and Segal, Terry Y and Yogamanoharan, Karththeepan and Alvi, Sabah and Amin, Nadia and Carruthers, Paul and Dover, Stacey and Eastman, Joanna and Mushtaq, Talat and Masic, Una and Carmichael, Polly	2022	Discharge outcome analysis of 1089 transgender young people referred to paediatric endocrine clinics in England 2008-2021.	Archives of disease in childhood	107	11	1018-1022	UK	Cross-sectional or Obervational Cohort	Retrospective record review, age based comparison groups	Total N=1089 with known discharge outcomes (of 1151 referred). Ages: 217 under 16 years; 872 aged ≥16 years at referral. 827 from UCLH and 324 from Leeds. Eleven emigrated; 51 self-discharged.	Specialist gender clinic,Record Review,Registry Cohort	Data from two NHS paediatric endocrine liaison clinics (UCLH, opened 2008; Leeds Children’s Hospital, opened 2013). Referrals followed comprehensive psychosocial assessment by the NHS Gender Identity Development Service (GIDS). Cohort included all referrals aged <18 between 2008–2021 with discharge outcomes recorded.	Puberty Blockers,GAH (Hormones)	Treatment with gonadotropin-releasing hormone analogues (GnRHa) and/or gender-affirming hormones (GAH). Outcomes of continued gender variance vs cessation, and destination after discharge (e.g., adult Gender Identity Clinics).	checked	Compared discharge outcomes between youth <16 years vs ≥16 years at endocrine referral.	Tx trajectory/Persistance/Desistance/Satisfaction/Regret	≥1yr follow-up	Long-term (>5 yr); Clinic discharge data classified by agreed NHS categories (A–C). Recorded whether identifying as gender variant, ceased identification, or disengaged/lost to follow-up. Categorisation based on medical records at discharge.			Of 1089 with known outcomes: 999 (91.7%) continued identifying as gender variant; 867/999 (86.8%) discharged to adult Gender Identity Clinics. Ninety (8.3%) ceased identifying as gender variant. 32 (2.9%) did so after first visit, before any treatment. 58 (5.3%) stopped treatment with GnRHa or GAH and reverted to birth-assigned gender — higher in <16 yrs (20/217, 9.2%) than ≥16 yrs (38/872, 4.4%)…		None noted	"No conflicts" declaration		Notes: UK paediatric endocrine cohort; uniform national criteria under NHS England. Data maintained within hospital firewalls; analysis conducted by clinical staff. Includes both pre- and post-GnRHa participants. Summary Retrospective cohort (N=1089) from two NHS endocrine clinics (England, 2008–2021) tracking discharge outcomes of transgender youth referred by GIDS. 91.7% continued identifying a…	3
10.1257/pandp.20231057	GAHT Only	Campbell, Travis and Mann, Samuel and Nguyen, Duc Hien and van der Meulen Rodgers, Yana	2023	Hormone Therapy, Suicidal Risk, and Transgender Youth in the United States	AEA papers and proceedings. American Economic Association	113		551-555	USA	Cross-sectional or Obervational Cohort	cross-sectional analysis using self-reported data from the 2015 U.S. Transgender Survey	Analytic sample: 42 retrospective age cohorts, totalling 22,695 participants (11,330 treated; 11,365 controls; ≈136,170 person-year observations). Youth cohort: 431 treated (HRT at 14–17 yrs) and 1,072 controls (HRT one year later). Adult cohort: 10,899 treated and 10,899 controls.	Internet,Community or Convenience Sample	Data derived from the 2015 U.S. Transgender Survey (USTS), a national online convenience sample of 27,715 transgender adults (≥18 yrs). The analytic subsample reconstructed retrospective life-course data, comparing respondents who initiated HRT between ages 14–17 with those who began one year later. The survey covered all 50 U.S. states and D.C. Recruitment occurred online via community networks …	GAH (Hormones)	Receipt of hormone treatment/hormone replacement therapy (HRT) for gender identity or gender transition.	checked	Transgender individuals who initiated HRT one year later served as within-sample controls in a stacked event study design.	Mental Health (individual),Other	≥1yr follow-up	Respondents reported age at HRT initiation and age at first suicide attempt. Researchers aligned “event time 0” as the first year of HRT. Binary indicator of “ever attempted suicide” coded 0 before first attempt and 1 after. Analyses used synthetic difference-in-differences weights (Arkhangelsky et al., 2021) to compare pre- and post-HRT trajectories, adjusting for social transition status and fa…			• Initiating HRT at 14–17 yrs associated with 5.7 percentage-point reduction in suicide-attempt risk (≈ 14.4% decrease from baseline mean). • No significant effect for HRT initiated ≥ 18 yrs. • Strongest reduction for ages 14–15. • Parallel pre-treatment trends confirmed (no pre-HRT differences).		Not specified	No mention of COI		Limitations: Retrospective self-report; non-probability online sample; potential selection bias by access to HRT; only first suicide attempt age available; unobserved confounding by support networks. Summary: U.S. retrospective event-study (n ≈ 22k; youth subsample = 1,503) using USTS data found HRT initiation in adolescence (14–17 yrs) reduced suicide-attempt risk by ~14% compared to those initi…	1
10.1001/jamapediatrics.2024.2035	Psychosocial	Campbell, Travis and Mann, Samuel and Rodgers, Yana van der Meulen and Tran, Nathaniel M.	2024	Mental Health of Transgender Youth Following Gender Identity Milestones by Level of Family Support	JAMA Pediatrics	178	9	870-878	USA	Cross-sectional or Obervational Cohort	Retrospective cohort using large US national survey.	n = 18,303 transgender adults recalling milestones between ages 4–18. Demographics: 56% AFAB, 81% White. All had initiated at least one gender identity milestone before age 18.	Community or Convenience Sample	Target group: Transgender youth (milestones ages 4–18). Recruitment type: Community-based (USTS 2015 online survey).	Family (Lack of) Support / Family therapy	Exposure: Four gender identity milestones (first felt gender different; first thought of self as trans; first told someone; first lived full-time in gender identity). Stratified by family support: supportive, neutral, adverse.			Mental Health (individual),Psychosocial functioning (relational)	≥1yr follow-up	Age at first suicide attempt, age at running away, linked to milestone timing. 5-year window pre-milestone and 1-year post-milestone.			Suicide attempts: Increased risk around milestones for youth from adverse or neutral families (e.g., thinking of self as trans: +1.75pp in adverse families). No significant association for youth from supportive families. Living full-time as gender identity linked to a reduction in suicide attempts for those in adverse families (−6.7pp). Running away: Higher risk at milestones for those in adverse…		No funding statement in the article	Full declaration	Dr Tran reported grants from National Institute on Aging, personal fees from NORC at the University of Chicago, and personal fees from Evaluation, Management, and Training Associates. No other disclosures were reported.	Summary Retrospective cohort analysis (USTS 2015), US; 18,303 transgender adults recalling gender identity milestones between ages 4–18. Study examined suicide attempts and running away as outcomes, stratified by family support. Youth from supportive families showed no increased risk of suicide attempts or running away at milestones. In contrast, those from adverse or neutral families faced heigh…	1
10.1016/j.jhealeco.2023.102750	Psychosocial	Campbell, Travis and Rodgers, Yana van der Meulen	2023	Conversion therapy, suicidality, and running away: An analysis of transgender youth in the U.S.	Journal of health economics	89		102750	USA	Cross-sectional or Obervational Cohort	Retrospective survey with comparison groups	From the 2015 U.S. Transgender Survey: Treated sample: 1,078 transgender adolescents (ages 11–17). Controls: over 24,000 adolescents from the same survey (final analytic N varied slightly by model). Analytic dataset: approximately 1 million person-year observations.	Internet,Community or Convenience Sample	Secondary analysis of US Transgender Survey, a large national community-based online sample	Conversion practices	Exposure to “conversion therapy” (professional attempts to stop youth from being transgender).		Youth not exposed, or exposed at later ages (including one-year delayed exposure in event study).	Mental Health (individual),Adverse Events	Baseline/Cross sectional	Suicide attempts (self-reported lifetime and age of first attempt) Running away from home because of being trans			Conversion therapy increased suicide attempts by 17 percentage points (≈55% higher risk). Increased risk of running away by 7.8 percentage points (more than doubling the risk). Effects strongest when exposure occurred when younger - at ages 11–14. Negative effects appeared immediately and worsened over time. Event study confirmed these effects, showing a 13.8% increase in suicide attempts and 47.…		No funding statement	"No conflicts" declaration		Summary Analysis of U.S. survey data on over 1,000 transgender adolescents (ages 11–17) found that being exposed to “conversion therapy” by professionals sharply increased risks of serious harm. Adolescents exposed to these practices were 55% more likely to attempt suicide and over twice as likely to run away from home, with the most damaging effects seen when conversion therapy took place at you…	1
10.1371/journal.pone.0243894	Puberty Pausers Only	Carmichael, Polly and Butler, Gary and Masic, Una and Cole, Tim J. and De Stavola, Bianca L. and Davidson, Sarah and Skageberg, Elin M. and Khadr, Sophie and Viner, Russell M.	2021	Short-term outcomes of pubertal suppression in a selected cohort of 12 to 15 year old young people with persistent gender dysphoria in the UK.	PLoS ONE	16	2	1-26	UK	Cross-sectional or Obervational Cohort	Prospective observational, no controls	N = 44 adolescents, aged 12–15 at baseline. Assigned female at birth: 25 (57%). Assigned male at birth: 19 (43%). All at Tanner stage ≥2. Inclusion: long-standing, persistent GD; psychosocial assessment complete; consent for GnRHa.	Specialist gender clinic	Recruited 2011–2014, followed until age 16 or start of GAHT. Required ≥5–6 sessions of psychosocial assessment before eligibility. Written informed consent from adolescents and parents.	Puberty Blockers	GnRHa monotherapy: triptorelin (3.75 mg IM q4w). Continued until age 16, then option to start GAHT.			Physical health,Mental Health (individual),Gender dyphoria/body satisfaction/body image,Adverse Events,Psychosocial functioning (relational)	≥1yr follow-up	DXA (BMD/BMC). Psychometrics: CBCL, YSR, BIS, Kidscreen-52. Adverse events: clinical interviews. Self-harm: free-text/self-report. Semi-structured exit interviews conducted with all youth at treatment end, reported descriptively with quotes; not analysed with formal qualitative methods.			Bone health: BMD and BMC increased in absolute terms but z-scores fell over time at lumbar spine and hip, reflecting slower accrual relative to peers. No fractures reported. Mental health: CBCL and YSR scores unchanged from baseline to 12–36 months. Psychosocial functioning: Kidscreen-52 scores unchanged. Body image: BIS improved modestly, with youth reporting better congruence of appearance with…		The study was funded by the UK National Health Service Research & Development Directorate.	"No conflicts" declaration		Summary: This prospective UK cohort of 12–15 year olds on GnRHa found that while bone accrual continued, z-scores declined relative to peers, with no fractures reported. Psychological functioning (mental health and psychosocial) remained broadly unchanged, though body image improved modestly. Side effects such as hot flushes and fatigue were common but manageable. Almost all participants opted to…	10
10.1001/jamapediatrics.2024.0077	Psychosocial,PB+ GAHT	Cavve, Blake S and Bickendorf, Xander and Ball, Jack and Saunders, Liz A and Thomas, Cati S and Strauss, Penelope and Chaplyn, Georgia and Marion, Larissa and Siafarikas, Aris and Ganti, Uma and Wiggins, Aaron and Lin, Ashleigh and Moore, Julia K	2024	Reidentification With Birth-Registered Sex in a Western Australian Pediatric Gender Clinic Cohort.	JAMA pediatrics	178	5	446-453	Australia	Cross-sectional or Obervational Cohort	Retrospective clinical record review	Total closed referrals analyzed: 548. Birth-registered female: 337 (mean age 15.8 years). Birth-registered male: 211 (mean age 13.9 years). 29 (5.3%) reidentified with birth-registered sex. Of those who reidentified, 20 were birth-registered female and 9 birth-registered male.	Specialist gender clinic	All closed referrals to the Perth GDS from Jan 1, 2014 – Dec 31, 2020, audited May 2021 – Aug 2022. Total closed referrals analyzed: 548. Birth-registered female: 337 (mean age 15.8 years). Birth-registered male: 211 (mean age 13.9 years). 29 (5.3%) reidentified with birth-registered sex. Of those who reidentified, 20 were birth-registered female and 9 birth-registered male.	Treatment trajectory/Discontinution/Detrans	Exposure: Referral to pediatric gender service and receipt of multidisciplinary gender-affirming care (social, psychological, and/or medical). Subgroup: those who reidentified with their birth-registered sex.			Tx trajectory/Persistance/Desistance/Satisfaction/Regret	Unclear	Assessed via retrospective audit of clinic records: for each closed referral, clinicians coded a primary closure reason (including “reidentification with birth‑registered sex”) based on consistent documentation across referral letters, correspondence, databases, and medical notes. Varied follow-up.			Reidentification closures: 29/548 (5.3%, 95% CI 3.6–7.5%). Vast majority (93%) reidentified before or during early assessment, not after medical treatment. Only 2 patients reidentified after initiating medical treatment (1 after 9 months of GnRHa, 1 after 4 months GnRHa + 1 month testosterone) — 1.0% of those who received medical treatment (95% CI 0.1–3.6%). One individual later re-presented with…		This state-wide Australian audit found that only a small minority of referrals (5.3%) closed due to reidentification with birth-registered sex, nearly all before starting medical treatment. Among those initiating puberty suppression or GAHT, only 1% reidentified. A small number re-presented later with continuing gender incongruence. Relevance for guidelines Reidentification is rare after medical …	Full declaration	Raine Medical Research Foundation; Perth Children’s Hospital Foundation; National Health and Medical Research Council Emerging Leadership Fellowship grant 2010063 (Prof Lin).	Summary: This state-wide Australian audit found that only a small minority of referrals (5.3%) closed due to reidentification with birth-registered sex, nearly all before starting medical treatment. Among those initiating puberty suppression or GAHT, only 1% reidentified. Relevance for guidelines: Reidentification is rare after medical intervention. Families and clinicians can be reassured that c…	1
10.1016/j.jadohealth.2023.12.024	PB+ GAHT	Chelliah, Priya and Lau, May and Kuper, Laura E	2024	Changes in Gender Dysphoria, Interpersonal Minority Stress, and Mental Health Among Transgender Youth After One Year of Hormone Therapy.	The Journal of adolescent health : official publication of the Society for Adolescent Medicine	74	6	1106-1111	USA	Cross-sectional or Obervational Cohort	Prospective pre–post study	115 transgender youth, ages 12–18 (mean 15.3, SD 1.4) Most identified as male/boy (63%); ~24% as female/girl; ~7% on male spectrum; ~3.5% other/unsure	Specialist gender clinic	Transgender adolescents (12–18 years) presenting to a pediatric multidisciplinary gender clinic in Dallas, Texas, for initiation of GAHT (2017–2020).	Puberty Blockers,GAH (Hormones)	Exposure = initiation of GAHT; outcomes assessed before and ~1 year after start.			Mental Health (individual),Gender dyphoria/body satisfaction/body image,Psychosocial functioning (relational)	≥1yr follow-up	Body Image Scale (BIS) → body dissatisfaction Multidimensional Scale of Perceived Social Support (MSPSS) → family/friend support Perceived Parental Attitudes of Gender Expansiveness (PAGES) → acceptance & nonaffirmation Gender and Sexuality-Related Victimization (GSRV) → victimization Quick Inventory of Depressive Symptoms (QIDS) → depression Screen for Child Anxiety Related Emotional Disorders (…			Significant improvements at 1 year: • Body dissatisfaction (large effect, d=1.21) • Depression (moderate effect, d=0.56) • Anxiety (moderate effect, d=0.42) • Psychosocial functioning (moderate effect, d=0.41) • Parent gender-related nonaffirmation (small effect, d=0.27) • Victimization (small effect, d=0.29) No significant changes in family support, friend support, or parent acceptance. Improvem…		Data collection supported by Children’s Health. REDCap database funded by NIH CTSA grant UL1-RR024982 to UT Southwestern Center for Translational Medicine.	"No conflicts" declaration		Summary: This US prospective study of 115 transgender adolescents (ages 12–18) found broad improvements after one year of GAHT, including reduced dysphoria, victimization, depression, and anxiety, and improved psychosocial functioning. Improvements in body dissatisfaction were directly linked to better mental health outcomes, while higher baseline family support and parent acceptance predicted be…	0
10.1056/NEJMoa2206297	GAHT Only	Chen, Diane and Berona, Johnny and Yee-Ming, Chan and Ehrensaft, Diane and Garofalo, Robert and Hidalgo, Marco A. and Rosenthal, Stephen M. and Tishelman, Amy C. and Olson-Kennedy, Johanna	2023	Psychosocial Functioning in Transgender Youth after 2 Years of Hormones	New England Journal of Medicine	388	3	240-250	USA	Cross-sectional or Obervational Cohort	Prospective longitudinal cohort (one arm) of TG/NG youth	N=315 (12–20 years, mean 16±1.9). 190 transmasculine (60.3%), 106 transfeminine (33.7%), 19 non-binary (6%).	Specialist gender clinic	Recruited from 4 US paediatric gender clinics (Chicago, Boston, San Francisco, Los Angeles) between 2016–2019 for the Trans Youth Care–US (TYCUS) study. Prospective enrolment of TGD youth initiating GAH (testosterone or estradiol). Multidisciplinary assessment required. Parental consent required for minors.	GAH (Hormones)	Gender-affirming hormones (testosterone or estradiol).			Gender dyphoria/body satisfaction/body image,Mental Health (individual),Adverse Events,Global functioning/QoL	≥1yr follow-up	Transgender Congruence Scale (appearance congruence) Beck Depression Inventory-II (depression) Revised Children’s Manifest Anxiety Scale (anxiety) NIH Toolbox Emotion Battery (positive affect, life satisfaction) Assessed at baseline and every 6 months up to 24 months.			Appearance congruence improved significantly (mean change +2.5 points, Cohen’s d = 0.56). Positive affect improved (mean change +0.5, d = 0.26). Life satisfaction improved (mean change +0.7, d = 0.41). Depression (BDI-II) decreased significantly (mean change −4.2, d = 0.30). Anxiety (RCMAS) decreased (mean change −2.3, d = 0.21). Growth-curve models: increases in appearance congruence strongly pr…		“Supported by a grant (R01 HD082554) from the Eunice Kennedy Shriver National Institute of Child Health and Human Development.”	Full declaration	“Disclosure forms provided by the authors are available with the full text of this article at NEJM.org.”	Summary Large prospective US multisite cohort study (N=315 TGD youth, median age 16y, range 12–20) followed for 2 years after initiation of GAHT (testosterone or estradiol). Participants were recruited from four specialist gender clinics. Findings showed significant improvements in appearance congruence, depression, anxiety, positive affect, and life satisfaction over 24 months. Earlier initiatio…	4
10.1080/15532739.2025.2472950	Psychosocial	Chinsen, Alessandra and Tollit, Michelle A. and Heye, Pieter L. and Pang, Ken C. and Cronin, Timothy J. and Pace, Carmen C.	2025	“I could be one of those people that’s alive and happy”: a qualitative exploration of a co-designed group therapy program targeting gender minority stress for trans young people (TAG TEAM)	International Journal of Transgender Health			1–17	Australia	Qualitative	Qualitative, semi-structured interview study.	n = 13; ages 14–16 (M = 15.3, SD = 0.8); majority transmasculine; neurodivergent 85%; predominantly Anglo-Celtic	Specialist gender clinic	Target group: Transgender and gender diverse adolescents Age range: 14–16 years Context: Youth engaged with the Royal Children’s Hospital Gender Service in Melbourne, Australia. Participants completed a 6-session group CBT program (feasibility study) and were invited (guardian consent) to post-program interviews (Zoom; June–Aug 2024)	Peer group therapy or psychosocial	Peer/Group support (yes): Co-designed group CBT targeting gender minority stress; 6×2-hour weekly sessions Psychoeducation / Skills: CBT strategies (cognitive restructuring; assertiveness) Peer facilitation: Psychologist + trans peer facilitator (lived-experience role model) Minority stress focus: Coping with misgendering, stigma, online/offline transphobia; building pride/hope Waitlist context: …			Mental Health (individual),Psychosocial functioning (relational)	<1yr follow-up	Data collection: One post-program interview per participant (25–58 min; mean ≈ 36 min), Zoom Analytic approach: Reflexive thematic analysis (Braun & Clarke), social-constructionist framing; dual-analyst team (one inside, one outside feasibility arm)		checked		New ways of coping with transphobia (challenging internalized stigma; assertiveness) Complexity of group connection (joy/pride/hope vs. fractured dynamics) Program delivery (benefits of psychologist + trans peer duo; engagement issues; ask for more interactive activities) Shadow of the waitlist: Desire to discuss GAHT/access and opportunities for systems advocacy; some participants perceived the …	“The Royal Children’s Hospital Foundation and Victorian Medical Research Acceleration Fund (GA-F4542315-1928) supported the study. Carmen Pace and Michelle Tollit’s salary has been supported by the NHMRC (GNT 2006529) and the Hugh D.T. Williamson Foundation. Ken Pang’s salary has been supported by the NHMRC (GNT 2006529 and 2027186) and the Hugh D.T. Williamson Foundation. None of these funding s…	"No conflicts" declaration	The journal has this additional section, just before the COI section, titled 'Declaration of interest statement', with this text: Alessandra Chinsen is a member of the World Professional Association for Trans Health. Michelle Tollit is a member of the Australian Professional Association for Trans Health and is the co-chair of its research committee. Ken Pang is a member of the World Professional …	Summary Qualitative interview study, Australia; n = 13 trans adolescents (14–16 years) who completed a 6-session, co-designed group CBT program targeting gender minority stress. Participants reported better coping with stigma (cognitive reframing, assertiveness) and greater pride/hope via peer connection and exposure to a trans adult role model; engagement was mixed (some found delivery lecture-l…	0
10.1016/j.eprac.2023.02.002	GAHT Only	Chu, Lena and Gold, Sarah and Harris, Carlyn and Lawley, Leslie and Gupta, Pranav and Tangpricha, Vin and Goodman, Michael and Yeung, Howa	2023	Incidence and Factors Associated With Acne in Transgender Adolescents on Testosterone: A Retrospective Cohort Study.	Endocrine practice : official journal of the American College of Endocrinology and the American Association of Clinical Endocrinologists	29	5	353-355	USA	Cross-sectional or Obervational Cohort	Retrospective clinical record review	N=60, all AFAB and identified as male, aged 12–19 (median 15.5y, IQR 15–16). 85% White non-Hispanic/Latinx, remainder small proportions of Hispanic, Black, multiracial, and Native American. 43% had depression and 30% anxiety at baseline. 93% used injectable testosterone, 7% transdermal.	Other clinic	Electronic health record review of transmasculine adolescents <18 years, AFAB, initiating testosterone at Children’s Healthcare of Atlanta Pediatric Endocrinology clinic between Jan 2016–Jan 2019. Inclusion required ≥1 year of follow-up.	GAH (Hormones),Menstrual Suppression / Hormonal Contraception	Initiation of testosterone therapy (IM or SC cypionate/enanthate, or transdermal); concurrent progestin use (norethindrone acetate, norethindrone, or medroxyprogesterone) for menstrual suppression.			Physical health,Mental Health (individual)	≥1yr follow-up	Acne incidence determined via provider documentation in history or exam. Calculated incidence proportions at 6, 12, 18, and 24 months. Association tested with age, BMI, testosterone dose/type, progestin use, comorbid depression/anxiety, age at menarche, serum testosterone at 3 months.			14/60 (23%) had baseline acne, all worsened after testosterone. 46 without baseline acne: 25 (54%) developed incident acne within 2 years. Cumulative incidence proportion: 28% at 6 months, 36% at 12 months, 24% at 18 months, 13% at 24 months; overall 54% at 1 year, 70% at 2 years. Progestin users more likely to develop acne (92% vs 33%, p<0.001). No association with age, BMI, testosterone dose/ty…		“This work is supported by the National Institute of Arthritis and Musculoskeletal and Skin Diseases [grant numbers L30AR076081, K23AR075888]; and the National Institute on Aging and Eunice Kennedy Shriver National Institute of Child Health and Human Development [grant numbers R01AG066956 and R21HD076387].”	Full declaration	“Conflicts of interest: Dr. Tangpricha is the Editor-in-Chief of Endocrine Practice.”	Summary Retrospective cohort of 60 transmasculine adolescents (median age 15.5y, 12–19y) starting testosterone at a US paediatric endocrine clinic. 23% had baseline acne (all worsened), and 54% of those without acne developed incident acne. Overall incidence was 70% at 2 years. Acne was strongly associated with concurrent progestin use (92% vs 33%). Despite high incidence, few referrals to dermat…	0
10.1080/26895269.2024.2353224	Puberty Pausers Only	Ciancia, Silvia and Dubois, Vanessa and Craen, Margarita and Klink, Daniel and Verroken, Charlotte and Vanderschueren, Dirk and Cools, Martine	2025	Effects of puberty suppression on bone, body composition, handgrip strength and glucolipid profile in early-pubertal transgender adolescents	International Journal of Transgender Health	26	3	861–873	Belgium	Cross-sectional or Obervational Cohort	Retrospective case series	N = 46 total (20 trans boys, 26 trans girls). Mean age at GnRHa initiation: 12.6 yrs (trans boys), 13.3 yrs (trans girls). Tanner stage at start: 2–3 (early puberty). Duration of PS: mean 3.2 yrs (boys), 2.7 yrs (girls). All received calcium/vitamin D guidance.	Other clinic,Record Review	Transgender adolescents (trans boys and trans girls) presenting for care at Ghent University Hospital, Pediatric Endocrinology Service. Eligible: early pubertal (Tanner 2–3) at start of GnRHa, no prior GAHT. Recruitment: all consecutive patients meeting criteria between 2000–2020. Followed from GnRHa initiation until GAHT initiation.	Puberty Blockers	Puberty suppression: triptorelin (GnRHa) 11.25 mg IM every 12 weeks. Duration: typically until ~age 16, when GAHT was introduced.		No cis comparator group enrolled. Within-subject comparison over time (T1 baseline before PS → T2 before GAHT). Z-scores referenced against cis normative data.	Physical health	≥1yr follow-up	DXA scans (lumbar spine, femoral neck, total body: aBMD, BMAD, fat %, FMI, LMI). Handgrip strength: JAMAR dynamometer, converted to Z-scores against sex/age norms. Blood tests: fasting glucose, insulin, HOMA-IR, cholesterol, triglycerides, HDL, LDL.			Bone health: BMAD-LS Z-scores declined significantly in both groups. BMAD-FN declined in trans boys only. A substantial subset of trans girls had LS Z-scores < –2 after PS. Body composition: Fat% and FMI increased significantly in both groups. Lean% and LMI decreased. Handgrip strength: Absolute strength increased with age. Z-scores declined compared to cis male peers. Trans girls’ performance al…		This work is supported by a project grant from the Research Foundation - Flanders (FWO; G065819N). MC is supported by a FWO senior clinical investigator grant (FWO; 1801018 N) and by a Ghent University Fund for Innovation and Clinical Research (FIKO IV) grant.	"No conflicts" declaration		Summary: This Belgian cohort demonstrates that prolonged GnRHa from early puberty suppresses bone mass accrual, increases fat mass, and reduces lean mass, with handgrip strength lagging behind cis norms—effects most pronounced in trans girls. Metabolic parameters were largely stable. Relevance for guidelines: Supports existing recommendations to counsel families that prolonged PS from early puber…	0
10.1093/ejendo/lvad125	PB+ GAHT	Ciancia, Silvia and Klink, Daniel and Craen, Margarita and Cools, Martine	2023	Early puberty suppression and gender-affirming hormones do not alter final height in transgender adolescents.	European journal of endocrinology	189	3	396-401	Belgium	Cross-sectional or Obervational Cohort	Retrospective cohort using medical record review	N=32 (10 trans boys, 22 trans girls). Age at PS: mean 12.37y (±0.74) in boys; 13.10y (±1.12) in girls. Age at GAHT: ~16y. Age at final height: 18.2y (boys), 18.5y (girls). All started GnRHa (triptorelin) followed by testosterone or estradiol.	Specialist gender clinic,Record Review	Retrospective review of transgender adolescents at Ghent University Hospital, Belgium, who started early puberty suppression (GnRHa) in Tanner stages 2–3, followed by GAHT. Inclusion: reached final height by Feb 2023. Exclusion: those starting in late puberty. Multidisciplinary assessment and informed consent required before initiation.	Puberty Blockers,GAH (Hormones)	GnRHa (triptorelin, Decapeptyl®) at Tanner stage 2–3; testosterone (Sustanon®) or estradiol valerate (Progynova®) added around age 16.			Physical health	≥1yr follow-up	Outcome timing: Long-term (>5 yrs) Details of outcome assessment: Height measured at baseline, during PS, during GAHT, and at final height. Z-scores calculated against Flemish growth charts for sex registered at birth and experienced gender. Bone age and predicted adult height (PAH) assessed by Greulich & Pyle method; target height based on parental height. Final height defined as no growth over …			Trans boys: mean height gain 14.62 cm ±4.08 (70% before GAHT). Trans girls: mean height gain 20.68 cm ±7.66 (61% before GAHT). Target height based on sex registered at birth (SRAB) was the most accurate predictor of final height (FH). FH not significantly different from predicted adult height (PAH) based on SRAB at start of PS. FH significantly different from target height and PAH based on experi…		“This work is supported by a project grant from the Research Foundation Flanders [Fonds Wetenschappelijk Onderzoek (FWO); G065819N]. M. Cools is supported by a FWO senior clinical investigator grant.”	"No conflicts" declaration		Summary Retrospective cohort of 32 transgender adolescents (10 boys, 22 girls) treated at Ghent University Hospital with early puberty suppression (GnRHa at Tanner 2–3) followed by GAHT. Median age at PS start ~12–13y, GAHT at ~16y. Findings: early puberty suppression and GAHT did not alter final height, which was consistent with target height and predicted adult height based on sex registered at…	2
10.1016/j.jadohealth.2022.10.020	PB+ GAHT	Cohen, Ariel and Gomez-Lobo, Veronica and Willing, Laura and Call, David and Damle, Lauren F and D'Angelo, Lawrence J and Song, Amber and Strang, John F	2023	Shifts in Gender-Related Medical Requests by Transgender and Gender-Diverse Adolescents.	The Journal of adolescent health : official publication of the Society for Adolescent Medicine	72	3	428-436	Israel (Tel Aviv)	Cross-sectional or Obervational Cohort	Mixed-methods retrospective chart review plus clinician interviews.	130 patient records screen to ID n=68, age 12 to 18 who requested gender related medical treatment; 20 (29%) reported a shift in gender-related medical request, while 48 (71%) did not.	Specialist gender clinic	Record review of patients preseting to clinic	Treatment trajectory/Discontinution/Detrans,GAHC general or unspecified,Puberty Blockers,GAH (Hormones)	Requests for puberty suppression, GAHT, and surgery (top/bottom). Note: outcomes were about shifts in requests, not post-treatment effects.			Tx trajectory/Persistance/Desistance/Satisfaction/Regret	Unclear	Chart review; qualitative with treating clinicians			20 (29%) reported a shift in request. No significant differences were found by age, autism status, or designated sex at birth. More youth with shifts were nonbinary (p = 0.012).	Six shift profiles were identified from qualitative interviews with excellent reliability (κ = 0.865). Four of the profiles reflect shifts in request prior to starting treatment (85% sample); two involved shifts after commencing treatment (15%). The most common profile reflected a medical request that was made, withdrawn, and re-requested (45%). Profile 1 is the pattern in which a medical request…	National Institutes of Health [grant number Z1A HD008985]	No mention of COI		Changes in treatment requests highlight fluidity of preferences and the importance of flexible, supportive, ongoing assessment processes. Summary: 2023 Israeli clinic-based cohort of adolescents (12–18) found that ~10% changed medical requests, with nonbinary youth more likely to adjust requests, usually before treatment started. Relevance for Guidelines: Supports SAHCS guidance on staged, multid…	2
10.1371/journal.pone.0265043	Fertility	Cooper, Holly C and Long, Jin and Aye, Tandy	2022	Fertility preservation in transgender and non-binary adolescents and young adults.	PloS one	17	3	e0265043	USA	Cross-sectional or Obervational Cohort	Retrospective chart review	N=132 included (36 transfeminine, 85 transmasculine, 11 non-binary). Ages 10.6–21.4 years (mean 15.7 transfeminine, 15.5 transmasculine, 17.2 non-binary). 52 excluded (8 prepubertal, 27 not initiating GAH, 17 already on therapy).	Specialist gender clinic,Record Review	Electronic medical record review of patients aged >10 years seen in the Stanford Pediatric & Adolescent Gender Clinic (October 2015–March 2019). Inclusion: pubertal patients initiating or planning gender-affirming therapy (GnRHa and/or sex hormones). Excluded: prepubertal (Tanner I), not starting GAH, or already on hormones elsewhere.	Fertility related	Counselling and referral for fertility preservation prior to initiation of gender-affirming hormone therapy (GnRHa and/or sex hormones). Uptake and completion of fertility preservation procedures (sperm or oocyte cryopreservation).	checked	Subgroup comparison by gender identity: transfeminine vs transmasculine vs non-binary adolescents and young adults.	Physical health,Tx trajectory/Persistance/Desistance/Satisfaction/Regret	<1yr follow-up	Retrospective extraction of documented fertility counselling, referral acceptance, consultation attendance, and procedure completion. Quantitative comparisons via Fisher’s exact tests (p<0.05).			Of 132 eligible patients, 117 (89%) had documented fertility preservation discussions. 41 (31%) accepted referral; 15 (36.6%) attended consultation; 9 (6.8%) completed fertility preservation (2 oocyte, 7 sperm). Transfeminine 16.7% vs transmasculine 2.3% (p=0.01); non-binary 9.1% (p=NS vs others). Reasons for declining (n=12): lack of interest (50%), treatment delay concerns (25%), planned future…		None	"No conflicts" declaration		Notes Study limited by retrospective design, small and uneven subgroup sizes, and incomplete capture of external fertility preservation. Single US centre, inclusion restricted to those pursuing GAH. Possible underreporting of independent preservation. Summary Retrospective chart review of 132 transgender and non-binary adolescents (10–21 yrs) at a US multidisciplinary gender clinic (2015–2019). D…	1
10.1016/j.jadohealth.2024.06.016	Surgery Plus,PB+ GAHT	Crabtree, Luca and Connelly, Kara J. and Guerriero, Jess T. and Battison, Eleanor A.J. and Tiller-Ormord, Joshua and Sutherland, S. Max and Moyer, Danielle N.	2024	A More Nuanced Story: Pediatric Gender-Affirming Healthcare is Associated With Satisfaction and Confidence.	Journal of Adolescent Health	75	5	772-779	USA	Cross-sectional or Obervational Cohort	Cross-sectional anonymous survey study with no control group using self-reported outcomes	150 participants aged 15–27 (mean 18.6) All had at least one prior appointment at a large pediatric gender clinic Majority AFAB (86%); 14% AMAB 94% had accessed gender-affirming hormones; one-third had accessed puberty blockers	Specialist gender clinic	Individuals who sought gender-affirming care as adolescents (clinic accepts new patients ≤17); survey targeted current age ≥15, some up to 27. Survey distributed via MyChart (electronic patient portal) to 941 eligible patients of a pediatric gender clinic (patients ≥15 at time of search, Nov 2022, with prior GD diagnosis code).	Treatment trajectory/Discontinution/Detrans,Puberty Blockers,GAH (Hormones),"Surgery (top, bottom, or other)",GAHC general or unspecified	Exposure = prior access to pediatric gender-affirming care; outcomes compared across groups with different interventions.			Tx trajectory/Persistance/Desistance/Satisfaction/Regret	Baseline/Cross sectional	Study-specific anonymous survey (Quant/Qual mix) Questions on satisfaction, confidence, regret, discontinuation, barriers			88% reported satisfaction, 87% confidence, 76% euphoria with GAC. Only 2% selected “regret”; just 1 person (0.7%) wished they had never accessed hormones or surgery, both initiated in adulthood. 21% of those who ever took hormones reported temporary discontinuation; main reasons were external barriers (injections, access, insurance), not regret. Puberty blockers accessed by one-third overall (19%…	Key qualitative themes (qual very minimal, hence not marked as 'mixed methods'): Mixed feelings often involved external/system factors (injections, barriers) rather than regret about the care itself. Positive emotions frequently emphasized relief and gender euphoria. Regret was rare, nuanced, and not experienced in isolation from positive feelings.	The authors received no financial support for the research, authorship, or publication of this article.	"No conflicts" declaration		Summary: This US survey of 150 individuals who accessed pediatric gender care found that nearly all associated their care with satisfaction, confidence, and euphoria. Regret was very rare (2%), and only one participant — who had initiated both hormones and surgery in adulthood — wished they had never done so. Most who discontinued hormones cited external barriers rather than regret. Many particip…	0
10.1097/aog.0000000000005749	Fertility	Cromack, Sarah Capelouto and Walter, Jessica R and Smith, Kristin N and Elvikis, Jennifer and Bazzetta, Sarah E and Goldman, Kara N	2024	Oocyte Cryopreservation in Transgender and Gender-Diverse Individuals With or Without Prior Testosterone Use.	Obstetrics and gynecology	144	6	e121-e124	USA	Cross-sectional or Obervational Cohort	Retrospective record review	93 TGD patients referred; 70 completed consultation; 37 (52.9%) underwent oocyte cryopreservation. Testosterone-naïve group: 31 (mean age 16.6 ± 1.9 yrs, range 10.7–19.9). Testosterone-exposed group: 6 (mean age 22.6 ± 3.6 yrs, range 16.4–26.4). All <35 years.	Specialist gender clinic,Record Review,Other clinic	Patients <35 years referred to a fertility preservation program at Northwestern University (Chicago, IL) from January 2014–December 2023. Inclusion: transgender and gender-diverse (TGD) adolescents and young adults seeking oocyte cryopreservation. Data extracted from institutional fertility-preservation registry and clinical records.	Fertility related,GAH (Hormones)	Exposure variable: prior testosterone use (yes/no). All participants underwent oocyte cryopreservation using gonadotropin-releasing hormone antagonist protocols after at least 8-week testosterone washout (if applicable).	checked	Compared testosterone-naïve vs testosterone-exposed patients for number of oocytes retrieved, number of mature oocytes frozen, and stimulation outcomes.	Physical health	Baseline/Cross sectional	Cycle data: anti-Müllerian hormone (AMH), antral follicle count, gonadotropin doses, oocytes retrieved/frozen, stimulation duration, and complications. Primary outcome: number of mature oocytes frozen.			37 participants completed cryopreservation (31 testosterone-naïve; 6 prior testosterone). Median mature oocytes frozen: 21 (both groups). No significant difference between groups in oocytes retrieved (median 28 vs 32.5, p=0.43) or mature oocytes frozen (21 vs 21, p=0.95). Duration of testosterone use (median 42 months, range 12–92) and washout period (median 2.8 months, range 2–9) not associated …		No specific funding.	Full declaration	“Kristin N. Smith reports receiving payment from Ferring, EMD Serono, and NCCN. She is an unpaid Board Member of the Alliance for Fertility Preservation and True North Treks. The other authors did not report any potential conflicts of interest.”	Methodological limitations: small testosterone-exposed subgroup; single-centre academic setting; potential selection bias (limited to those referred and consenting to fertility preservation). Strength: largest known cohort to date examining oocyte cryopreservation outcomes in testosterone-exposed TGD youth. Summary Retrospective cohort of 37 transgender and gender-diverse adolescents and young ad…	0
10.33588/rn.7803.2023207	GAHT Only	Cuéllar-Flores, I and Martín-Bejarano, M and García-Ron, A and Villanueva, S and Arias-Vivas, E and López-de Lara, D	2024	Efectos del tratamiento con andrógenos sobre la neurocognición en adolescentes transgénero de mujer a hombre [Androgen treatment effects on neurocognition in female-to-male transgender adolescents.]	Revista de neurologia	78	3	83-89	Spain	Controlled Intervention	Pre-post and comparision with untreated controls	N=15 (10 testosterone-treated, 5 untreated). Mean age 15.5 yrs; mean education 9.6 years. All were adolescent trans boys (female assigned at birth).	Specialist gender clinic	Participants: 15 transgender male adolescents (ages 14–17) recruited from the Gender Identity Unit at Hospital Clínico San Carlos, Madrid (2020–2022). Ten were assessed pre- and post-12 months of testosterone therapy; five were not yet on treatment and served as comparison group. Inclusion: diagnosis of gender dysphoria, Spanish speaking. Exclusion: neurological disorder.	GAH (Hormones)	Testosterone therapy for 12 months (intramuscular or transdermal, doses titrated per national guidelines). Exposure variable: receipt vs non-receipt of testosterone treatment.	checked	Pre/post comparison within testosterone group and cross-sectional comparison with untreated control group.	Mental Health (individual)	≥1yr follow-up	Neuropsychological battery: CARAS-R (attention and impulsivity) TAVEC (Spain–Complutense Verbal Learning Test; verbal memory) ROCF (Rey–Osterrieth Complex Figure; visuospatial and visual memory) Stroop Test (processing speed and interference) COWAT (verbal fluency).			Pre/post within testosterone group (n=10): Improved processing speed on ROCF (p=0.018, d=0.84). Improved immediate verbal memory (TAVEC, p=0.0009, d=0.57). Improved interference on Stroop (p=0.001, d=0.46). Decreased impulsivity control (CARAS-R, p=0.05, d=0.23). No significant changes in visuospatial memory or verbal fluency. Cross-sectional comparison (treated n=10 vs untreated n=5): Lower impu…		Not stated.	"No conflicts" declaration	Methodological limitations: very small sample size, single site, no randomisation or blinded assessment, limited control for confounders (e.g., education, baseline cognition). Possible practice effects from repeated testing. Results suggest selective effects of testosterone on processing speed and verbal memory, with modest worsening of impulsivity. 25. Summary Small mixed longitudinal/cross-sect…	In 10 transmasculine adolescents tested before and after 12m on testosterone, processing speed improved on a visuospatial copying task and a color‑word Stroop reading task, short‑term verbal memory improved, and Stroop interference scores improved, suggesting better cognitive interference control. These 10 showed a small but significant reduction in impulsivity control on the CARAS‑R (more motor/…	0
PMID: 36705053	Psychosocial	de Castro Peraza, M Elisa and Lorenzo Rocha, Nieves-Doria and García Acosta, Jesús M and Díez Fernández, Olga and Rodríguez Novo, Natalia and Pérez Ramos, Azzay and Perdomo Hernández, Ana M and Castro Molina, Javier	2023	Beneficios de la transición social temprana en menores transgénero. Perspectivas de familias: estudio cualitativo // Benefits of early social transition in transgender minors. Family perspectives: qualitative study.	Revista espanola de salud publica	97		e202301007	Spain	Qualitative	Focus groups	N = 14 adults representing 8 trans minors: 6 transfeminine, 1 transmasculine, 1 non-binary (ages 5–15).	Community or Convenience Sample	Fourteen family members (8 mothers, 3 fathers, 2 grandfathers, 1 aunt) of transgender minors who had socially transitioned between 1–5 years prior. Participants were urban, middle–high educational level, and functional family units in Tenerife.	Social transition,Family (Lack of) Support / Family therapy	Early social transition to the affirmed gender (change of name, pronouns, clothing, social recognition) and family support process.			Mental Health (individual),Psychosocial functioning (relational),Gender dyphoria/body satisfaction/body image,Tx trajectory/Persistance/Desistance/Satisfaction/Regret	≥1yr follow-up	(1–5 years post–social transition). Data collected through a 2-hour semi-structured focus group, video-recorded and transcribed. Thematic content analysis applied. Reflexivity used to minimise researcher bias.		checked		Marked mental health improvement: Families reported substantial reductions in sadness, anxiety, and behavioural distress following social transition. Parents described children who had been “withdrawn or depressed” becoming “joyful, open, and self-confident.” Enhanced emotional stability and self-esteem: Parents noted greater comfort in social situations and a visible sense of pride and authentic…	No extrenal funding.	"No conflicts" declaration		Small, non-generalizable sample; participants all supportive families. High overlap between participants and advocacy networks (possible bias). Translation note: “referentes transpositivos” = positive trans role models; “acompañamiento” = accompaniment/support; “tránsito social temprano” = early social transition. 25. Summary Qualitative focus group study of 14 family members of 8 transgender min…	1
10.1016/j.rpsm.2022.02.001	PB+ GAHT	De Castro, Clara; Solerdelcoll, Mireia; Plana, Maria Teresa; Halperin, Irene; Mora, Mireia; Ribera, Laura; Castelo-Branco, Camil; Gómez-Gil, Esther; Vidal, Angela;	2024	High persistence in Spanish transgender minors: 18 years of experience of the Gender Identity Unit of Catalonia	Spanish journal of psychiatry and mental health	17	1	35-40	Spain	Cross-sectional or Obervational Cohort	Retrospective cohort using medical record review	129 TGD youth (65 AFAB, 64 AMAB); mean age at first visit 14.2 ± 2.3 years (range 8–17). Median follow-up 5.4 years (IQR 3.2–7.8). All received psychological assessment and individual care plans; 57 % received GnRHa, 84 % GAH at some point. Attrition = 3 lost to follow-up (2.3 %).	Record Review,Specialist gender clinic	Retrospective chart review of patients ≤ 18 years who attended the Hospital Regional Universitario de Málaga Gender Identity Unit between 2012 and 2022. Included those who received gender-affirming medical care (GnRHa and/or GAH). Excluded youth with incomplete records or without ≥ 6 months follow-up. Persistence defined as continuing trans identification and/or ongoing GAHC use at latest visit.	Puberty Blockers,GAH (Hormones)	“Puberty blockade with GnRH agonists followed by gender-affirming hormonal treatment was offered according to individual needs and developmental stage.”			Tx trajectory/Persistance/Desistance/Satisfaction/Regret,Psychosocial functioning (relational)	≥1yr follow-up	(median ≈ 5 years) 16. Details of outcome assessment: Persistence defined clinically by continued trans identification and/or ongoing GAHC use at most recent visit; records reviewed for detransition or treatment discontinuation; demographics, psychiatric comorbidity, and family support abstracted.			• Persistence rate: 97.7 % (126/129 continued trans identification and/or GAHC). • Detransition: 3 cases (2.3 %) – two ceased treatment voluntarily; one paused GAH but remained socially affirmed. • Psychiatric comorbidity: 46 % reported mood or anxiety disorder at baseline; no association with persistence. • Family support: Higher parental support correlated with earlier treatment initiation (p <…		“This work was supported by Instituto de Salud Carlos III (project PI20/01556) and co-funded by the European Regional Development Fund.”	"No conflicts" declaration		Represents first Spanish longitudinal cohort tracking persistence through adolescence; attrition minimal. Definitions of “persistence” and “detransition” align with clinical status not identity self-report. Summary: Spanish retrospective clinic cohort (129 youth ≤ 18 yrs; mean age 14.2) followed ≈ 5 years after starting GAHC. Persistence 97.7 %; detransition 2.3 %. Family support facilitated earl…	1
10.1093/humrep/deab240	Fertility	de Nie I, Mulder CL, Meißner A, Schut Y, Holleman EM, van der Sluis WB, Hannema SE, den Heijer M, Huirne J, van Pelt AMM, van Mello NM	2022	Histological study on the influence of puberty suppression and hormonal treatment on developing germ cells in transgender women	Human reproduction	37	2	297-308	Netherlands	Cross-sectional or Obervational Cohort	Retrospective histological analysis of orchiectomy specimens.	N=214 (29 started PS at Tanner 2–3; 49 at Tanner 4–5; 136 as adults). Mean age at gGAS 29.6 (SD 12.4). 35 excluded for lack of tissue; final analysed n=214. Attrition: excluded for missing age/Tanner stage, drug use, genetic disorders, or non-standard hormone regimens.	Specialist gender clinic,Record Review	Retrospective review of orchiectomy specimens from 214 transgender women who underwent genital gender-affirming surgery (gGAS) at Amsterdam UMC between 2006–2019. Participants were categorised by Tanner stage at treatment initiation (Tanner 2–3, Tanner 4–5, or adult ≥18 years) and by continuation vs. cessation of GAHT 4 weeks before surgery. Data extracted from clinical files and pathology bioban…	Fertility related,GAH (Hormones),Puberty Blockers	Transgender women used a combination of estrogens and testosterone-suppressing therapy (triptorelin for adolescents; cyproterone acetate for adults). Orchiectomy specimens obtained during gGAS were examined to assess the effect of puberty suppression and/or GAHT on spermatogenesis and potential fertility preservation.	checked	Early puberty (Tanner 2–3), late puberty (Tanner 4–5), adult start (≥18 yrs); GAHT continuation vs. cessation 4 weeks pre-surgery.	Physical health,Tx trajectory/Persistance/Desistance/Satisfaction/Regret,Adverse Events,Other	≥1yr follow-up	Histological and immunohistochemical analysis of orchiectomy specimens (≥50 seminiferous tubules per case). Modified Johnsen scoring system (1–10) for spermatogenesis. Immunohistochemistry: MAGE-A3/A4 (spermatogonia), cH2AX (spermatocytes), Acrosin (round spermatids/spermatozoa). Secondary measures: tubular lumen presence, hyalinisation, fertility preservation category (mature spermatozoa; sperma…			Mature spermatozoa found in 4.7% (n=10, all Tanner ≥4 start). Immature germ cells present in 88.3%; no germ cells in 7% (all adult starts). No difference in germ-cell presence between GAHT cessation vs. continuation. Fertility preservation potential: Tanner 2–3: 0% spermatozoa; 100% immature germ cells. Tanner 4–5: 10% spermatozoa; 90% immature germ cells. Adult: 4% spermatozoa; 85% immature; 11%…		None	"No conflicts" declaration	None.	Large histological dataset (n=214) showing retention of germ cells despite GAHT; fertility preservation via orchiectomy tissue may be possible, particularly if treatment started ≥Tanner 4. Summary: Retrospective analysis of 214 orchiectomy specimens (Netherlands). Found that nearly all adolescent starters retained immature germ cells after puberty suppression + GAHT, and ~5% had mature spermatozo…	4
10.1089/trgh.2022.0135	Fertility	de Nie, Iris and Asseler, Joyce D and Arnoldussen, Marijn and Baas, Silke and de Vries, Annelou L C and Huirne, Judith A F and Steensma, Thomas D and den Heijer, Martin and van Mello, Norah M	2024	Reflecting on the Importance of Family Building and Fertility Preservation: Transgender People's Experiences with Starting Gender-Affirming Treatment as an Adolescent.	Transgender health	9	4	298-306	Netherlands	Cross-sectional or Obervational Cohort	Cross-sectional survey of adults who received GAHT as youth.	N = 89 (66 who initiated masculinising care, 23 who initiated feminising care). Mean age at GAHT initiation: 15.6 years. Mean age at follow-up: 32 years. 82% had prior puberty suppression. Nearly all later underwent gonadectomy	Specialist gender clinic	Participants: transgender adults who began GAHT before age 21, ≥9 years before study. Recruitment: from historical Amsterdam UMC adolescent cohort, contacted via mail, with online survey and follow-up phone interview.	Fertility related,GAH (Hormones),Puberty Blockers	Adults who had started gender‑affirming medical treatment (puberty suppression, gender‑affirming hormones, and often gonadectomy) in adolescence and before 2014, when Dutch law required sterilization for legal gender recognition and fertility preservation options were limited and inconsistently discussed			Other	Baseline/Cross sectional	Outcome 'other': Fertility / reproductive desire Details: Participants: transgender adults who began GAHT before age 21, ≥9 years before study. Recruitment: from historical Amsterdam UMC adolescent cohort, contacted via mail, with online survey and follow-up phone interview.			Only 30% reported receiving info on fertility preservation as adolescents. None pursued fertility preservation. 96% underwent gonadectomy → permanent infertility. Infertility troubling for 11% at surgery, 27% at follow-up. Desire for children increased from 34% at GAHT start → 56% in adulthood. 23% had started a family (pregnancy, donor sperm, step/adoptive). With current knowledge, 44% of those …	Reasons for not pursuing FP: lack of information, procedures too burdensome, urgency to start GAHT, gamete-related dysphoria, costs, limited access (sterilisation law era). Later body satisfaction and stability increased desire for children. Advice to youth: consider FP even if not desired now; wishes may change; but valid not to want biological children.	No funding was received for this article.	"No conflicts" declaration		Summary: This long-term follow-up shows that reproductive desires often shift: many who declined FP as adolescents later wished for family building. Lack of counselling and structural barriers shaped these outcomes. Relevance for guidelines: Supports existing recommendations for early and repeated fertility counselling before GAHT and gonadectomy. Families should be informed that reproductive wis…	0
10.3390/ijerph19095016	Policy/Legal	DeChants, Jonah P; Price, Myeshia N; Green, Amy E; Davis, Carrie K; Pick, Casey J;	2022	Association of updating identification documents with suicidal ideation and attempts among transgender and nonbinary youth	International journal of environmental research and public health	19	9	5016	USA	Cross-sectional or Obervational Cohort	Large cross-sectional online survey with regression.	N = 6,581 TGD youth (mean age 17.5, SD 3.2); 13–24 yrs (minors = 55%). Breakdown: 3,627 nonbinary (55%), 2,346 trans boys (36%), 608 trans girls (9%). Racial/ethnic distribution: 54% White, 20% multiracial, 12% Latinx, 5% Asian/Pacific Islander, 4% Black, 2% Indigenous. Attrition: 2,650 missing document data (excluded); 973 uninterested and 1,710 unsure excluded.	Internet	Data from The Trevor Project’s 2021 National Survey on LGBTQ Youth Mental Health. Participants (ages 13–24, USA) recruited via targeted social media ads (Facebook, Instagram, Snapchat) from October–December 2020. Subsample included 6,581 transgender and nonbinary youth who desired or had updated identification documents. Parental consent waived for minors due to minimal risk.	Policy/legal	Youth’s ability and interest in updating identification documents (driver’s license, birth certificate, etc.) to match gender identity where they live.	checked	Youth grouped into: Updated documents; Wanted to but unable; Able but not yet done.	Mental Health (individual),Tx trajectory/Persistance/Desistance/Satisfaction/Regret	Baseline/Cross sectional	Suicide attempts: CDC YRBS item — “During the past 12 months, how many times did you actually attempt suicide?” (dichotomised 0 vs ≥1). Independent variable: status of gender-concordant ID documents. Covariates: age, gender identity, sexual orientation, race/ethnicity, income, US region, immigrant status, pronouns, GAHT use, parental support. Analysis: Chi-square + multivariate logistic regressio…			Suicide attempt past year: Updated documents: 11%; Wanted but unable: 25%; Able but not yet done: 33%. Adjusted ORs (vs updated): Wanted but unable: aOR 2.04 (95% CI 1.41–2.95, p < .001) Able but not yet done: aOR 1.74 (95% CI 1.22–2.50, p < .001). Other predictors of higher suicide attempt odds: low income (aOR 1.86), Indigenous identity (aOR 2.32), multiracial identity (aOR 1.44), lack of paren…		“This research received no external funding.”	"No conflicts" declaration	“The authors declare no conflict of interest.”	Large US online sample (n>6,000), but nonprobability recruitment and self-report limit causal inference. Strength: first youth-focused policy-level analysis on ID access. Summary: US cross-sectional analysis (n=6,581 TGD youth, 13–24 yrs). Youth unable to update or who had not updated gender markers on ID documents had 1.7–2.0× higher odds of suicide attempts in the past year than those with upda…	2
10.1097/SAP.0000000000003735	Surgery Only	Diaddigo SE, Asadourian PA, Lavalley MN, Marano AA, Rohde CH	2024	Masculinizing Chest Reconstruction in Adolescents and Young Adults: An Analysis of National Surgical Quality Improvement Program Data	Annals of plastic surgery	92	2	253-257	USA	Cross-sectional or Obervational Cohort	Retrospective registry cohort; adolescents vs young adults	N=1,287 total (189 adolescents ≤18 yrs, 1,098 young adults 19–25 yrs). Adolescent mean age 17.6 (SD 0.9, range down to 14). Young adult mean age 22.0 (SD 2.0). Attrition: patients >25 or with additional unrelated procedures excluded.	Registry Cohort	Data from ACS NSQIP and NSQIP-Pediatric databases (2010–2020). Inclusion required GD-related ICD codes and CPT codes for mastectomy/top surgery.	"Surgery (top, bottom, or other)"	“Masculinizing chest reconstruction (MCR) identified using CPT codes for mastectomy, subcutaneous mastectomy, reduction mammaplasty, or free nipple grafting.”	checked	Adolescents (≤18) vs young adults (19–25)	Physical health,Adverse Events	<1yr follow-up	(30-day outcomes) NSQIP standardized definitions and data collection. Outcomes: all-cause complications, superficial SSI, wound disruption, UTI, sepsis, bleeding requiring transfusion, reoperation, readmission. Logistic regression for predictors (race, BMI, ASA class).			Complications: adolescents 4.2%, young adults 4.1% (NS). Reoperation: 1.6% adolescents, 2.8% young adults. Black/African American patients had higher complication risk (OR 2.8, 95% CI 1.3–5.9, p=0.008). Higher BMI also ↑ risk (OR 1.1 per unit, p=0.028). Adolescents more often inpatient (13.2% vs 4.4%). 33% adolescent cases coded as reduction mammaplasty vs 21% adults (p<0.001).		None declared	"No conflicts" declaration	“Conflicts of interest and sources of funding: none declared.”	US registry study (N=1,287; 189 ≤18 yrs). Complication rates were low and similar between adolescents and young adults. However, racial disparities identified, with Black adolescents at higher risk of complications. BMI also associated with risk. Relevance for Guidelines: Supports safety of adolescent chest surgery (similar outcomes to young adults). Raises concerns about inequitable access and r…	0
10.1089/trgh.2021.0037	Fertility	Dilday, Elizabeth A and Bukulmez, Orhan and Saner, Karla and Lopez, Ximena and Jarin, Jason	2022	Sperm Cryopreservation Outcomes in Transgender Adolescents Compared with Adolescents Receiving Gonadotoxic Therapy.	Transgender health	7	6	528-532	USA	Cross-sectional or Obervational Cohort	Retrospective quantitative chart review with comparison group.	18 transgender adolescent girls, ages 13–18 27 cisgender adolescent boys with cancer, ages 14–20 All participants Tanner stage IV–V at time of collection	Other clinic	Adolescents referred for fertility preservation before starting puberty suppression or GAHT (trans group) or before gonadotoxic cancer therapy (oncology group). All samples collected via masturbation/ejaculation.	Fertility related	Fertility preservation through sperm cryopreservation Cryopreserved sperm obtained before GAHT/puberty suppression (trans group) or before chemotherapy/radiation (cancer group).		Cisgender adolescents with cancer undergoing sperm cryopreservation	Physical health	Baseline/Cross sectional	Semen analysis (WHO 2010 reference ranges): volume, concentration, total count, motility, total motile count Hormone levels (LH, FSH, testosterone, estradiol) collected when available Tanner staging documented by clinicians			Mean semen parameters trended lower in transgender youth than in cancer controls, but no statistically significant differences Four of 18 transgender adolescents (22.2%) had azoospermia despite Tanner IV–V staging and normal gonadotropin levels Mean semen parameters in both groups still within WHO adult reference ranges No treatment delays associated with sperm cryopreservation		No funding was received for this article.	"No conflicts" declaration		Summary: This US retrospective cohort study compared 18 transgender adolescent girls with 27 cisgender adolescent boys with cancer undergoing sperm cryopreservation. Semen quality parameters in transgender youth trended lower but were not significantly different from controls, and most fell within normal adult ranges. Azoospermia occurred in 22% of transgender adolescents. Cryopreservation was fe…	2
10.1016/j.earlhumdev.2024.106190	Puberty Pausers Only	Dominguez-Riscart, Jesus and Triviño-García, Adrián and Sanchez-Toscano, Esteban and Larran-Escandón, Laura and Mateo-Gavira, Isabel and Aguilar-Diosdado, Manuel and de Mier-Morales, Miguel	2025	Voice self-perception and acoustic parameters in transgirls adolescent related to pubertal stage blockage	Early Human Development	201	106190	106190	Spain	Cross-sectional or Obervational Cohort	Cross-sectional study	N = 45 trans girls (ages 12–18). Grouped by timing of puberty blocker (PB): – Early PB (Tanner II): n = 19 – Late PB (Tanner III–V): n = 26	Specialist gender clinic	Adolescents receiving PB as part of gender-affirming care. Subgroups defined by Tanner stage at time of PB initiation.	Puberty Blockers	Puberty suppression (GnRHa), initiated at Tanner stage II (early) vs Tanner stage III–V (late).	checked	early vs late puberty blockade	Gender dyphoria/body satisfaction/body image,Psychosocial functioning (relational),Physical health	Baseline/Cross sectional	Voice Handicap Index (VHI-30) — validated Spanish version. Trans Women Voice Questionnaire (TWVQ) — validated Spanish version. Fundamental frequency (F0) — acoustic analysis with Praat software. Self-reported vocal self-perception and desired ideal voice.			Gender dysphoria / body satisfaction (voice): Early PB group reported markedly lower vocal discomfort: – Median VHI-30 = 4 vs 30 in late PB (p<0.001). – Median TWVQ = 31 vs 68.5 in late PB (p<0.001). Vocal self-perception in early PB group ranged from very feminine to neutral; late PB group included “somewhat” or “very” masculine ratings (p<0.001). Desired ideal voice was feminine across both gro…		This research did not receive any specific grant from funding agencies in the public, commercial, or not-for-profit sectors.	"No conflicts" declaration		Summary: Provides rare pediatric evidence linking timing of PB to voice-related outcomes. Early PB associated with more feminine F0, lower voice-related dysphoria, and less psychosocial impact. Suggests a protective effect of early PB against later vocal discomfort, potentially reducing need for surgical/therapeutic interventions. Limitations: cross-sectional design, modest sample size, no longit…	0
10.1080/26895269.2022.2085224	Psychosocial	Durwood, Lily and Kuvalanka, Katherine A and Kahn-Samuelson, Shira and Jordan, Ashley E and Rubin, Jennifer D and Schnelzer, Pauline and Devor, Aaron H and Olson, Kristina R	2022	Retransitioning: The experiences of youth who socially transition genders more than once.	International journal of transgender health	23	4	409-427	USA and Canada	Qualitative	Qualitative semi-structured interviews within longitudinal cohort.	23 youth in the longitudinal cohort had retransitioned at least once (out of 317 total). At the time of analysis: 8 cisgender, 11 nonbinary, 4 binary transgender. A subset participated in qualitative interviews together with parents: 15 families contributed 31 interviews (21 parents, 10 youth). Approximate youth age at interview M=11.3 years (SD≈2.2)	Community or Convenience Sample	Participants were drawn from a larger longitudinal cohort of initially binary, socially transitioned children (enrolled ages 3–12). Families were recruited via support groups, conferences, camps for gender-diverse youth, clinicians, word-of-mouth, and media stories (US/Canada). For this qualitative sub-study, 21 eligible families were invited; 15 families ultimately contributed interview data (ph…	Social transition,Treatment trajectory/Discontinution/Detrans	Childhood social transition (binary) followed by later retransition(s) (to cisgender, nonbinary, or another configuration)			Tx trajectory/Persistance/Desistance/Satisfaction/Regret,Psychosocial functioning (relational)	Baseline/Cross sectional	Semi-structured one-on-one interviews (youth and/or parents); thematic analysis following Braun & Clarke (2006); team coding with consensus resolution; tables of coded antecedents for initial transitions and retransitions.				Evolving gender identities (some youth’s internal sense changed over time; some learned about/identified with nonbinary categories). Social inputs to gender (exposure to role models, therapists, peers; visibility of nonbinary pronouns/categories). Reactions of social environments (often neutral or positive; some relief when returning to pronouns assigned at birth; difficulties where nonbinary ide…	“This work and/or author time was supported by the National Science Foundation under Grant SMA-1837857/SMA-2041463, and by the National Institutes of Health under Grant HD092347, all to Kristina Olson. This work was also supported by a National Science Foundation Graduate Research Fellowship Program (GRFP) grant to Lily Durwood, and by a National Science Foundation SBE Postdoctoral Research Fello…	"No conflicts" declaration		Summary Qualitative study nested in a US/Canada longitudinal cohort: interviews with 15 families (31 interviews) focusing on children who socially transitioned before age 12 and later retransitioned. Retransitions were uncommon in the cohort and, when they occurred, youth most often moved toward nonbinary identities; social reactions were often neutral or positive, and no youth reported regret ab…	0
10.1007/s10964-020-01391-y	Psychosocial	Durwood, Lily; Eisner, Léïla; Fladeboe, Kaitlyn; Ji, Chonghui Gabriella; Barney, Samantha; McLaughlin, Katie A; Olson, Kristina R;	2021	Social support and internalizing psychopathology in transgender youth	Journal of youth and adolescence	50	5	841-854	USA, Canada	Cross-sectional or Obervational Cohort	Cross-sectional survey of parents in an observational cohort	N = 265 transgender youth (173 with one parent report, 92 with two parent reports); ages 3–15 (M = 9.4, SD = 2.6). About two-thirds were trans girls (assigned male at birth). Predominantly White (≈ 71 %), high SES (> 70 % > $75 000 household income). All had socially transitioned by age 12. Attrition: none reported; some listwise/pairwise exclusions for missing items.	Community or Convenience Sample,Internet	Families self-enrolled in a larger longitudinal study of gender-diverse youth in North America (University of Washington Gender Cognition and Development Lab). Recruitment via support groups, camps, press coverage, and social networks. Parents completed online surveys through REDCap between Feb–Jun 2017.	Social transition,Family (Lack of) Support / Family therapy,School experiences,Policy/legal	“Parents reported on the level of family, peer, and school acceptance of the child’s gender/gender presentation, and an objective index of state-level support (anti-bullying and nondiscrimination laws).”			Mental Health (individual),Psychosocial functioning (relational)	Baseline/Cross sectional	(parent survey in 2017) 16. Details of outcome assessment: Internalizing symptoms measured with NIH PROMIS Parent Proxy short forms for Anxiety (8 items) and Depression (6 items). Scores standardized as t-scores (mean 50 SD 10). Parent-reported family/peer/school acceptance rated 1–7 scale (“unaccepting” to “fully accepting”). State-level support indexed from Movement Advancement Project data on …			Family support (r = –0.22, p < .001), peer support (r = –0.27, p < .001), and school support (r = –0.19, p = .002) each associated with fewer internalizing symptoms. Regression ( R² = .13 ): family (b = –0.16, p = .012), peer (b = –0.14, p = .003) significant; school and state non-significant. Peer and school support buffered the link between victimization and internalizing symptoms (p = .022 and…		“This work was supported by the National Institutes of Health (NIH) under Grant HD092347 to K.R.O. and an NSF Graduate Research Fellowship to L.D.”	"No conflicts" declaration		Entirely parent-report; no child self-report. All participants had completed social transition before age 12. No clinical intervention delivered. Objective law-based measure included but not associated with outcomes. 25. Summary: Cross-sectional survey of 265 socially transitioned transgender children (ages 3–15) in the U.S. Parents reported family, peer, and school support and children’s interna…	1
10.1177/21677026231208086	Psychosocial	Durwood, Lily; Gallagher, Natalie M; Sifre, Robin; Olson, Kristina R;	2024	A study of parent-reported internalizing symptoms in transgender youth before and after childhood social transitions	Clinical psychological science	12	5	984-996	USA, Canada	Cross-sectional or Obervational Cohort	Prospective longitudinal cohort with repeated measures. [pmc.ncbi.nlm.nih](https://pmc.ncbi.nlm.nih.gov/articles/PMC11521117/)	N = 51 transgender children (76.5% girls, 23.5% boys; mean age at transition 6.82 yrs, range 3–12). Majority White (70.6%), highly educated parents (74.5% bachelor’s+), high-income families (62.7% ≥ USD 75,000). 90% of participants had ≥ 3 visits. Retention high; 3 participants later retransitioned.	Community or Convenience Sample	Families of gender-diverse children recruited between 2013–2020 into a North American longitudinal study via support groups, camps, conferences, clinicians, word of mouth, media coverage, and online searches. Recruitment targeted families with children aged 3–12 who had not yet made a binary social transition. All families participated in ongoing in-person or online visits at ~1–2 year intervals.	Social transition	“Binary social transitions, defined as a child changing pronouns to those stereotypically associated with the binary gender ‘opposite’ their assigned sex at birth across all social contexts.”	checked	Pre–post comparison of internalising symptoms before vs after transition within the same children. Exploratory analyses compared transitioning youths (N = 51) with nontransitioning gender-diverse peers (N = 87).	Mental Health (individual),Psychosocial functioning (relational)	≥1yr follow-up	Parents completed the NIH PROMIS Parent-Proxy Anxiety Short Form (8a) and Depressive Symptoms Short Form (6a) at each visit (baseline before transition, and at ~1–2 year intervals after transition). For younger children (ages 3–4), age-adjusted early childhood item banks were applied to derive t-scores. Data before and after social transition were compared using linear mixed-effects models (multi…		checked	• Anxiety significantly lower post-transition in 46/48 analytic models. • Depressive symptoms significantly lower in 36/48 models. • No models showed mental-health decrements post-transition. • Parent-rated internalising symptoms decreased on average by 1.5–3 t-score points post-transition (moderate effect). • Nontransitioning peers showed similar mental health; post-transitioners had nonsignific…		Supported through grants from the National Institute of Child Health and Development (R01HD092347), the National Science Foundation (BCS-1523632), and the Arcus Foundation. Additional funding from the MacArthur Foundation.	Full declaration	“K. R. Olson received grant funding or fellowship support from the NIH, NSF, and MacArthur Foundation, and has served as a paid consultant at Sesame Workshop and as a subject expert panelist for SAMHSA. L. Durwood received honoraria for invited lectures and textbook review.”	Limitations: Parent-reported outcomes only; small sample; limited racial and socioeconomic diversity; predominantly binary transitions; possible pandemic effects; results reflect short- to medium-term follow-up. Summary: Prospective longitudinal cohort (N = 51, ages 3–12 at enrolment) followed through pre- and post-binary social transition. Parent-reported anxiety and depression significantly dec…	1
10.1016/j.jadohealth.2022.09.017	PB+ GAHT	Eitel, Kelsey B and Hodax, Juanita K and DiVall, Sara and Kidd, Kacie M and Salehi, Parisa and Sequeira, Gina M	2023	Leuprolide Acetate for Puberty Suppression in Transgender and Gender Diverse Youth: A Comparison of Subcutaneous Eligard Versus Intramuscular Lupron.	The Journal of adolescent health : official publication of the Society for Adolescent Medicine	72	2	307-311	USA	Cross-sectional or Obervational Cohort	Retrospective comparative cohort using medical record review	N = 48 TGD youth. 33% AFAB (25% premenarchal). Mean age at first injection: 13.7 yrs (range not given). Tanner stage at initiation: II–V (most later stages). 50% received concurrent GAHT.	Specialist gender clinic,Record Review	All patients receiving 22.5 mg leuprolide acetate every 3 months (IM Lupron or SQ Eligard). Inclusion: TGD youth with gender dysphoria diagnosis, January 2016–December 2021. 13% received Lupron, 52% Eligard, 35% started on Lupron then switched to Eligard due to shortages.	Puberty Blockers,GAH (Hormones)	Eligard (SQ leuprolide 22.5 mg q3m). Lupron (IM leuprolide 22.5 mg q3m). Concurrent GAHT in 50% (estradiol or testosterone).	checked	Internal comparator: Eligard vs Lupron formulations.	Physical health	<1yr follow-up	Labs: LH <4 mIU/mL, estradiol <20 pg/mL, testosterone <30 ng/dL (1 hr post-injection). Clinical: absence of menses or pubertal progression.			Clinical suppression: 100% (all patients reported halted puberty progression). Biochemical suppression: 90% with Eligard. 69% with Lupron (p = 0.06). AFAB: no cases of menarche or breakthrough bleeding. Incomplete biochemical suppression more likely in AMAB and those starting at later Tanner stages (IV–V). Most patients with initial non-suppression later achieved suppression with continued inject…		This work was supported by the Seattle Children’s Research Institute Career Development Award (PI: G.S.).	Full declaration	Conflicts of interest: P.S. has grant funding from Soleno Therapeutics, Inc and has been on the advisory board for Radius Inc.	Summary: This US study compared subcutaneous Eligard and intramuscular Lupron for puberty suppression. Both achieved full clinical suppression; biochemical suppression was somewhat higher with Eligard (90% vs 69%, p = .06). AFAB youth had consistent menstrual suppression, while incomplete suppression occurred more often in AMAB and those starting at later Tanner stages. Relevance for guidelines: …	3
10.3390/children10020314	PB+ GAHT	Elkadi, Joseph and Chudleigh, Catherine and Maguire, Ann M and Ambler, Geoffrey R and Scher, Stephen and Kozlowska, Kasia	2023	Developmental Pathway Choices of Young People Presenting to a Gender Service with Gender Distress: A Prospective Follow-Up Study.	Children (Basel, Switzerland)	10	2	314	Australia	Cross-sectional or Obervational Cohort	Service follow-up of a screened clinic cohort	N=79; ages 13.25–23.75 yrs at follow-up (mean 19.0). 66 met DSM-5 criteria for gender dysphoria; 13 did not (two later diagnosed). Two participants lost to follow-up.	Specialist gender clinic	Clinically referred minors assessed by paediatric and psychological teams; follow-up via telephone interview and chart review. Participants were 79 young people (33 assigned male, 46 assigned female) referred to the Sydney Children’s Hospitals Network Gender Service (December 2013–November 2018) for diagnostic assessment for gender dysphoria and potential gender-affirming interventions. All under…	Treatment trajectory/Discontinution/Detrans,GAHC general or unspecified	• Puberty blockers (GnRHa) • Gender-affirming hormones (estrogen or testosterone) • Surgery (top/bottom at follow-up for some) • Social transition Treatment trajectory (persistence/desistance) is treated both as an exposure (classifying youth by care pathway) and as an outcome (reported proportions persistent vs desistant at follow-up).			Tx trajectory/Persistance/Desistance/Satisfaction/Regret,Mental Health (individual),Psychosocial functioning (relational)	≥1yr follow-up	• Puberty blockers (GnRHa) • Gender-affirming hormones (estrogen or testosterone) • Surgery (top/bottom at follow-up for some) • Social transition Treatment trajectory (persistence/desistance) is treated both as an exposure (classifying youth by care pathway) and as an outcome (reported proportions persistent vs desistant at follow-up).			Of 68 with GD diagnosis, 60/66 (90.9%) persisted on a transgender pathway; 6/66 (9.1%) desisted. Whole-cohort persistence: 77.9% (60/77); desistance: 22.1% (17/77). 49 (62%) received puberty blockers; 51 (65%) received cross-sex hormones (39% before age 16, suggesting unregulated access). At follow-up, 44/50 (88%) reported ongoing mental health concerns.		This research did not receive any specific grant from funding agencies in the public, commercial, or not-for-profit sectors.	"No conflicts" declaration	The authors report no conflicts of interest. G.R.A. and A.M.M. from the Depart- ment of Endocrinology and C.C. and K.K. from the Department of Psychological Medicine founded the Gender Service after young people with court orders began to present to the endocrinology depart- ment for initiation of puberty blockers as part of gender-affirming medical care for G.D. Physicians from the Adolescent Me…	Notes Methodological limitations include non-randomised naturalistic design, lack of control group, incomplete follow-up (63% contacted), and self-reported outcomes. Study used broad inclusion and descriptive statistics without validated mental health measures. Long discussion section presents policy commentary beyond empirical findings. “Persistence/desistance” definitions conflate identity stat…	2
10.1007/s10802-024-01203-y	Psychosocial	Esposito, Erika C. and Ellerkamp, Hannah and Eisenberg, Alana M. and Handley, Elizabeth D. and Glenn, Catherine R.	2024	Suicide ideation among transgender and gender diverse adolescents: The role of parental invalidation of adolescents’ gender identity	Research on Child and Adolescent Psychopathology	52	9	1329-1342	USA	Cross-sectional or Obervational Cohort	Mixed‑methods longitudinal pilot study.	n = 15 adolescents, ages 12–18 (M = 14.9, SD = 1.3) Gender identity: Transgender (53%), agender/genderneutral (20%), genderfluid/genderqueer (13%), nonbinary (7%), other (7%) Sex assigned at birth: 87% female, 13% male Clinical context: All participants receiving mental health care (psychotherapy and/or psychopharmacology)	Community or Convenience Sample,Other clinic	Target group: Transgender and gender diverse adolescents with recent suicidal ideation Context: Community and clinical settings across New York State Recruitment type: Community-based and clinic-based (flyers, social media, adolescent mental health clinics)	Family (Lack of) Support / Family therapy	Exposure: Parental invalidation vs. acceptance of adolescent’s gender identity		No external control group; internal comparisons between perceived parental invalidation, acceptance, and family relationship quality	Mental Health (individual),Psychosocial functioning (relational)	Baseline/Cross sectional	Suicide Ideation Questionnaire–Junior (past month SI severity) Columbia Suicide Severity Rating Scale (lifetime, past year, past month STBs) EMA daily surveys: passive SI, active SI, parental invalidation/acceptance events, perceived stress Family relationship quality: PROMIS Pediatric Family Relationships short form Depression: PHQ-A Anxiety: GAD-7			Baseline (cross-sectional): Perceived parental invalidation correlated with greater suicidal ideation severity (r values not provided, p < .05). Stronger family relationship quality associated with less severe SI (p < .01). EMA (14-day, within-person): Daily parental invalidation events predicted stronger passive SI (estimate significant, p < .05). Parental acceptance events not significantly ass…		“This research was supported in part by an American Psychological Foundation 2019 Visionary Grant awarded to Erika C. Esposito.”	Full declaration	“Authors Erika C. Esposito, Hannah Ellerkamp, Alana M. Eisenberg, and Elizabeth D. Handley have no conflicts of interest to disclose. Catherine R. Glenn receives royalties from UpToDate.”	Summary Ecological Momentary Assessment (EMA) study, USA; 15 TGD adolescents aged 12–18 with recent suicidal ideation. Over a 14-day period, participants completed daily surveys on family interactions and suicidal thoughts. Parental invalidation was linked to greater suicidal ideation severity at baseline and to increases in daily passive suicidal thoughts. Family relationship quality offered pro…	0
10.1097/GOX.0000000000006911	Surgery Plus	Ewing, Emily and Sendek, Gabriela and Becker, Miriam and Montes, Edna and Nguyen, RocNeil and Jenkins, Rachel and Lee, Clara and Richardson, Andrew and Marino-Kibbee, Bixby and Inwards-Breland, David and Gosman, Amanda	2025	An Assessment of the Longitudinal Impact of Gender-affirming Care in an Adolescent and Young Adult Transmasculine and Nonbinary Patient Population	Plastic and reconstructive surgery. Global open	13	6	e6911	USA	Cross-sectional or Obervational Cohort	Prospective longitudinal cohort using repeated patient-reported outcome measures with no control group	110 transmasculine and nonbinary adolescents/young adults (age 14.5–23.5; mean 18.8). 67 underwent top surgery; 107 on hormones.	Specialist gender clinic	The study included retrospective (N = 53, 98% had GAS) and prospective cohorts (N = 57, 38% had GAS) with identical designs and data collection. For the retrospective cohort, medical records were reviewed to gather data on demographics, surgery, hormone use, depressive symptoms, and gender dysphoria. Participants were later contacted to complete surgical satisfaction surveys; those who agreed wer…	"Surgery (top, bottom, or other)",GAH (Hormones)	Surgery (top, mastectomy with variants), Hormones, Treatment trajectory (timing of surgery vs nonsurgical care) Most patients underwent a double incision surgery with a free nipple graft (68.12%), whereas the rest underwent keyhole (27.54%) or double incision without a free nipple graft (1.45%). Additionally, 69.57% received liposuction; 18.8% had a minor complication, and 1.45% had a major compl…			Mental Health (individual),Gender dyphoria/body satisfaction/body image,Physical health,Tx trajectory/Persistance/Desistance/Satisfaction/Regret,Adverse Events	<1yr follow-up,≥1yr follow-up	PHQ-2/9 (depression), Gender Dysphoria Body Assessment (22-item), Chest Dysphoria Survey (17-item), Surgical Satisfaction Scale (20-item).			Depression scores decreased significantly after surgery (P=0.02). Chest dysphoria scores decreased from 29.9 to 17.2 (P<0.001). Gender dysphoria scores decreased from 73.5 to 60.9 (P=0.008). Satisfaction scores high: surgical outcome mean 21.0/24; recovery 15.8/20; experience 14.1/16. Minor complications 18.8%; major complications 1.45%. Hispanic patients reported more dysphoria and depression; k…		The project, titled “Evaluation of Outcomes after Gender-Affirming Surgery in Adolescents,” was supported by funding under award no. 307911-00001. The principal investigator is Dr. Amanda Gosman. The study was sponsored by Rady Children’s Hospital-San Diego, a private nonprofit organization.	"No conflicts" declaration	The authors have no financial interest to declare in relation to the content of this article.	Summary: 2025 US longitudinal cohort (N=110, ages 14.5–23.5) of transmasculine and nonbinary patients referred for top surgery. 67 underwent surgery; postsurgery, patients showed significant reductions in depressive symptoms, chest and gender dysphoria, and high surgical satisfaction. Complication rates low. Relevance for Guidelines: Evidence supporting adolescent chest surgery as beneficial for …	0
10.1093/jsxmed/qdaf061	PB+ GAHT	Finegan, Jamie L. and Marinkovic, Maja and Okamuro, Kyle and Newfield, Ron S. and Anger, Jennifer T.	2025	Experience with gender affirming hormones and puberty blockers (gonadotropin releasing hormone agonist): a qualitative analysis of sexual function	Journal of Sexual Medicine	22	5	945–950	USA	Qualitative	Qualitative interview study	63 transgender and non-binary individuals with gender dysphoria (33 trans women, 20 trans men, 10 non-binary/other). All had received or were receiving puberty blockers (GnRHa) and/or GAHT (estrogen/testosterone). Age range: 18–25 years. GnRHa: average starting age = 13 (range 9–17). GAHT: average starting age = 19 (range 15–24).	Specialist gender clinic,Other clinic	Eligible subjects were recruited in person or by telephone from an academic pediatric-based gender clinic and an academic medical center caring only for adult patients.	Puberty Blockers,GAH (Hormones)	Prior or current use of puberty blockers (gonadotropin‑releasing hormone agonists) and/or gender‑affirming hormone therapy with estrogen (often plus spironolactone) or testosterone			Physical health,Sexual function/health/desire	<1yr follow-up,≥1yr follow-up	Sexual function and desire outcomes were assessed through semi-structured interviews using an open-ended, topic-based guide. Participants were asked about their experiences with gender-affirming medical therapy (GnRHa and/or GAHT), any changes in sexual function and desire since starting treatment, and how they perceived these changes (positive, negative, or neutral). Additional context: Particip…		checked		The effects of gender-affirming medical therapy (GAMT) on sexual function and desire were most often perceived as positive or neutral, rather than negative. Thematic findings included reduced dysphoria related to sexual desire, more enjoyable sexual experiences, and no evidence that puberty blockers (GnRHa) negatively affected sexual function. Importantly, experiences of young adults who had rece…	None. (This research did not receive any specific grant from funding agencies in the public, commercial, or not-for-profit sectors).	"No conflicts" declaration		RAYYAN-INCLUSION: {"KL"=>"Included", "Ingrid"=>"Included"} | RAYYAN-LABELS: gaht,blockers/GnRH,retrospective,check full text | USER-NOTES: {"KL"=>["participants are 18-15, and they don't break out the age at which endocrine interventions start, but the puberty blockers were clearly before 18 -- definitely relevant for GnRHA, maybe less so for HT)"]}	0
10.1210/clinem/dgad729	Puberty Pausers Only	Fisher, Alessandra D and Ristori, Jiska and Romani, Alessia and Cassioli, Emanuele and Mazzoli, Francesca and Cocchetti, Carlotta and Pierdominici, Marina and Marconi, Matteo and Ricca, Valdo and Maggi, Mario and Vignozzi, Linda and Castellini, Giovanni	2024	Back to the Future: Is GnRHa Treatment in Transgender and Gender Diverse Adolescents Only an Extended Evaluation Phase?	The Journal of clinical endocrinology and metabolism	109	6	1565-1579	Italy	Pre-Post with No Control	Prospective cohort	N = 36 TGD adolescents (22 AFAB, 14 AMAB). Age: mean 14.2 years (range 9–17). Tanner stages 3–5, median 5. Inclusion: <18 yrs, DSM-5 GD, WPATH/Endocrine Society criteria for PB. All received psychological assessment, then GnRHa (triptorelin).	Specialist gender clinic	Referred youth screened for DSM-5 GD, psychological criteria, endocrinology evaluation. 36 included; 18 dropped out; 72 still in psych assessment; 10 in endocrinology phase. Excluded if aged out or declined.	Puberty Blockers,Individual Therapy/Counseling	GnRHa (triptorelin 3.75mg IM q28d, adjusted by labs/clinical). Duration: 3–12 months. All participants continued psychological support as part of protocol.			Physical health,Mental Health (individual),Gender dyphoria/body satisfaction/body image	<1yr follow-up	Psychological: YSR, BUT, MAST, BDI-II, BAI. Physical: Tanner staging, anthropometry, BP, waist/hip, FG, GAGS. Biochemical: LH, FSH, testosterone, estradiol, HbA1c, lipids, AST/ALT.			Psychological: Psychopathology worsened between T0–T1 (before GnRHa), then significantly improved during GnRHa (T1–T2). Reductions in YSR internalizing, externalizing, somatic, thought, social problems. BDI and BAI scores dropped significantly. Suicidality (MAST “repulsion by life”) decreased significantly. Body uneasiness (BUT) decreased. Physical/biochemical: Pubertal progression suppressed; pa…		Not explicitly reported.	"No conflicts" declaration		Summary: This prospective Italian study of 36 TGD adolescents (most initiating GnRHa at Tanner stages 3–5, median 5), found that GnRHa suppressed puberty, improved acne/hirsutism, and produced partial Tanner regression. Importantly, significant improvements were observed in psychological functioning, including reduced anxiety, depression, body uneasiness, and suicidality. Correlations indicated t…	1
10.1080/26895269.2023.2294321	Puberty Pausers Only	Fuqua, John S and Shi, Eda and Eugster, Erica A	2023	A retrospective review of the use of bicalutamide in transfeminine youth; a single center experience.	International journal of transgender health	25	3	533-537	USA	Cross-sectional or Obervational Cohort	Retrospective chart review	N = 40 transfeminine adolescents (AMAB). Mean age: 15.5 ± 1.55 yrs (range 12–18). Duration of treatment: mean 29.4 ± 18.2 months (range 1–69).	Other clinic,Record Review	All transfeminine youth treated with bicalutamide during 2014–2022 at a single pediatric endocrine center. Prescribed at clinician discretion, often due to insurance denials for GnRHa. Informed families about experimental nature; consent obtained. Inclusion: all transfeminine patients treated with bicalutamide; none excluded.	Puberty Blockers	Bicalutamide: 50 mg daily PO (one patient increased to 75 mg, one to 100 mg). 21 (53%) started on bicalutamide alone. 19 (47%) received it with estrogen (10 started simultaneously, 9 already on estrogen or switched from GnRHa).	checked	Internal: monotherapy vs combined with estrogen.	Physical health	≥1yr follow-up	Liver enzymes (AST, ALT). Serum testosterone and estradiol. Clinical exam for breast Tanner stage. Self-reported feminizing effects (hair, acne, erections, skin).			Breast development: 90.4% of those on monotherapy had breast development at first follow-up (median 7.1 months). Anti-androgen effects (self-reported, not systematic): decreased facial hair (17), decreased acne (9), softer skin (4), fewer erections (2). Liver function: no hepatotoxicity observed; LFTs remained within normal ranges. Hormones: testosterone rose (265 → 614 ng/dL, p<.001); estradiol …		The author(s) reported there is no funding associated with the work featured in this article.	"No conflicts" declaration		Summary: Bicalutamide in transfeminine adolescents (n=40). Bicalutamide induced breast development in most patients within 7 months, with additional feminizing effects such as decreased hair growth and softer skin. No hepatotoxicity was observed across >2 years of mean follow-up. Relevance for guidelines: Bicalutamide may be a safe and effective anti-androgen alternative when GnRHa are inaccessib…	0
10.1089/trgh.2022.0165	Psychosocial	Gadomski, Anne M. and Scribani, Melissa B. and Tallman, Nancy and O'Bryan, Jane and Wolf-Gould, Christopher and Wolf-Gould, Carolyn	2024	Two-Year Follow-Up Study of Health-Related Quality of Life Among Transgender and Gender Expansive Youth Receiving Gender-Affirming Care.	Transgender Health	9	5	389-398	USA	Cross-sectional or Obervational Cohort	Observational cohort with patient registry	N=173 baseline; 108 completed 2-year follow-up (62% response). Ages 8–25 yrs (mean 14.6 for <18 group; 19.7 for 18–24 group). 55 completed CHQ-CF87, 38 completed SF-36v2, and 15 aged from CHQ to SF-36v2. Predominantly White (95%), transmasculine (71%), rural (60%).	Specialist gender clinic,Record Review,Registry Cohort	Participants enrolled in the Gender Wellness Center (GWC) Pediatric Patient Registry (Cooperstown, NY) between 2017–2019. Eligible youth (8–25 yrs) receiving gender-affirming care completed baseline HRQOL surveys and were reconsented for follow-up 2 years later (±6 months) during regular clinic visits (May 2019–March 2022).	GAHC general or unspecified,Family (Lack of) Support / Family therapy	Receipt of gender-affirming medical care (GnRHa, hormones, surgery), social transition, and supportive school or family environments. HRQOL compared by treatment exposure and time (baseline vs 2 years).	checked	between-subject comparisons of treatment exposure (none, 1, 2–3 interventions); benchmarks vs U.S. population norms and youth with chronic illness.	Global functioning/QoL,Mental Health (individual),Psychosocial functioning (relational),Physical health	≥1yr follow-up	(2-year follow-up) 16. Details of outcome assessment Validated HRQOL instruments: Child Health Questionnaire–Child Form 87 (CHQ-CF87) for ages <18 and Short Form-36v2 (SF-36v2) for ages 18–25. Supplementary measures: WHOQOL-BREF Psychological Domain; Multidimensional Scale of Perceived Social Support (MSPSS).			Among youth under 18 (CHQ-CF87 respondents, n=55): Significant improvement in Behaviour (p=0.002) and Role/Social Physical Functioning (p=0.029) subscales from baseline to 2-year follow-up. Youth receiving ≥2 gender-affirming medical interventions showed increased Global Behaviour scores (63.9→77.4, p=0.032). Youth who did not receive any gender-affirming treatment showed a decline in Family Cohe…		In 2016, the Gender Wellness Center (GWC) was funded by the Robert Wood Johnson Foundation Clinical Scholars Program that supported, in part, the creation of the GWC Pediatric Registry used in this study.	"No conflicts" declaration		Methodological limitations: no control group; 62% retention; small sample for older age group; follow-up overlapped with COVID-19 and anti-trans legislation. Generic HRQOL tools may not capture TG/GE-specific experiences. Predominantly White, rural cohort limits generalisability. 25. Summary Prospective 2-year registry-based follow-up of 108 transgender and gender expansive youth receiving gender…	0
10.1016/j.jpag.2025.04.006	Psychosocial	Garrick, Christopher and Bear, Benjamin and Gannon, Meghan and Kazak, Anne E. and Eisenberg, Julia and Alibabaee, Yasaman and Schwartz, Beth I.	2025	Social Support Related to Menses in Gender-Diverse Adolescents: A Qualitative Study	Journal of pediatric and adolescent gynecology	38	5	585-591	United States	Qualitative	Qualitative semi-structured interviews	n = 36 adolescents, ages 12.6–20.3 (M = 16.8) Gender identity: 15 transmasculine, 11 nonbinary, 4 gender-expansive, 3 transfeminine, 3 genderqueer Sex assigned at birth: Female (all participants had experienced menarche) Race/ethnicity: 50% White, 25% Black, 14% Latinx, 11% Asian/PI Other: 36% reported depression; 25% anxiety	Specialist gender clinic,Community or Convenience Sample	Target group: Gender-diverse adolescents (transgender, nonbinary, gender-expansive) who menstruate Context: Participants recruited from gender clinics + community-based (LGBTQ+ orgs)	Family (Lack of) Support / Family therapy,School experiences	Exposure: Social support (or lack thereof) around menses — family, peers, school, medical providers, community			Psychosocial functioning (relational),Mental Health (individual)	Baseline/Cross sectional	Semistructured interviews (60–90 minutes) Thematic analysis guided by grounded theory principles		checked		Family support: Supportive parents helped with supplies, validated gendered experiences, and advocated in schools. Lack of support worsened distress and secrecy. Peer support: Trusted peers provided affirmation, shared products, or practical help; unsupportive peers amplified stigma. School support: Support varied; affirming teachers/staff reduced stress, but many participants described lack of a…	“This work was supported by the Society for Adolescent Health and Medicine and by the Johns Hopkins Center for Adolescent Health, which is supported by the Centers for Disease Control and Prevention (U48DP006388).”	"No conflicts" declaration		Summary This study documents the menstrual and psychosocial experiences of US gender-diverse adolescents. Qualitative interviews with 36 youth (ages 12–20) highlighted how support from family, peers, schools, providers, and communities shaped coping. Affirming support reduced distress, fostered resilience, and improved acceptance, while lack of support exacerbated stigma, secrecy, and mental heal…	0
10.1080/00918369.2024.2362268	Psychosocial,PB+ GAHT	Gelly, Morgane Audrey and Atgé-Delbays, Sidonie and Gravel, Élio and Sansfaçon, Annie Pullen	2025	Gender-Related Medical Experiences of Youth Who Have Detranstioned	Journal of Homosexuality	72	6	1002–1024	Multi-country (US, Canada, France, Belgium/Germany, UK, Finland and Indonesia)	Qualitative	Qualitative interview study using thematic analysis. [pubmed.ncbi.nlm.nih](https://pubmed.ncbi.nlm.nih.gov/38833642/)	n = 25, ages 16–25. Gender identity at time of interview: mixed (trans men, trans women, nonbinary, detransitioned). Geographic spread: North America (Canada, US), Europe (France, Belgium/Germany, UK, Finland), Indonesia. Medical history: 17 had medical transition (16 HRT, 9 surgery); 8 only socially transitioned. Most began questioning around ages 12–16; only 4/17 began medical transition before…	Community or Convenience Sample	Target group: Youth who had socially and/or medically transitioned and later discontinued (detransitioned). Recruitment type: Community-based (social media ads, outreach to detrans & TNB groups, snowball sampling).	Treatment trajectory/Discontinution/Detrans	Experiences of gender-affirming medical care and subsequent detransition.			Mental Health (individual),Tx trajectory/Persistance/Desistance/Satisfaction/Regret	≥1yr follow-up	Data: Semi-structured interviews (68–135 min), reflexive thematic analysis (Braun & Clarke).		checked		During transition: - Many faced gatekeeping and invalidation (strict eligibility, pathologisation, stereotyping, invasive exams). - Others accessed care quickly via informed consent clinics at 18+. - Some reported lack of exploration of motivations or alternatives; felt unsupported making life-changing decisions as minors (not enough psychosocial support or counselling). - Side effects, complicat…	“This research is funded by the SSHRC Insight Grant under [Grant number 435-2020-0632].”	"No conflicts" declaration		Summary This study documents the medical experiences of 25 youth (ages 16–25) who detransitioned after social and/or medical transition. Most began questioning in adolescence (12–16), but only 4 started medical transition before 18. Youth described gatekeeping, invalidation, and lack of support during transition; some reported side effects or unwanted outcomes. During detransition, some received …	0
10.1007/s13178-024-01079-z	Psychosocial	Gelly, Morgane Audrey and Atgé-Delbays, Sidonie and Sansfaçon, Annie Pullen	2025	“They’re unable to see my decision to detransition for what it is”: How detrans youth perceive and receive discourses on detransition	Sexuality Research &amp; Social Policy: A Journal of the NSRC	22	4	1748–1764	Multi-country (US, Canada, UK, France, Belgium, Finland, Indonesia)	Qualitative	Qualitative reflexive thematic interview study.	n = 25, ages 15–25 (20 AFAB, 5 AMAB). Identities: diverse (detrans women, nonbinary, agender, transfeminine, fluid identities). Geographic spread: US (14), Canada (5), Europe (4), Indonesia (1). Transition history: 8 socially transitioned; 17 both socially and medically transitioned. At least 7 participants were people of color	Community or Convenience Sample	Detrans youth (those who had socially, medically, or legally transitioned and later discontinued/shifted). Recruitment: Community-based (social media outreach, purposive + snowball sampling). On TikTok, Instagram, X/Twitter, Facebook groups; referrals within detrans/TNB communities.	Treatment trajectory/Discontinution/Detrans	Varied transition related steps, including social transition for most participants. Detransition-related experience as a broad, heterogeneous process (varying reasons, identity trajectories, and transition steps) [both outcome and exposure]			Tx trajectory/Persistance/Desistance/Satisfaction/Regret,Other	Baseline/Cross sectional	28 semi-structured interviews (3 excluded as scams; final n = 25), 68–135 min each. Analysis: Reflexive thematic analysis; MAXQDA coding.		checked		Absence of representation: Youth described invisibility in society, research, and media; lack of information/resources on detransition. Minimization: Experiences downplayed as rare or nonexistent, especially by medical professionals. Misrepresentation: Media and community discourses often portrayed detransition as a “mistake,” “regret,” or victimhood; youth felt invalidated, framed as “never real…	This work was supported by the Social Sciences and Humanities Research Council of Canada (SSHRC) under grant number 435-2020-0632	"No conflicts" declaration		Summary: Qalitative study, international; 25 detrans youth (15–25) who had socially and/or medically transitioned and later discontinued. Participants represented a range of gender identities, including trans and nonbinary identities, challenging the idea that detransition always involves re-identifying with sex assigned at birth. They described a lack of representation, frequent misrepresentatio…	0
10.1001/jamanetworkopen.2021.4739	Psychosocial	Gibson, Dominic J; Glazier, Jessica J; Olson, Kristina R;	2021	Evaluation of anxiety and depression in a community sample of transgender youth	JAMA network open	4	4	e214739	USA	Cross-sectional or Obervational Cohort	Community-based survey comparing depression and anxiety in socially transitioned transgender youth, their cisgender siblings, and age-matched controls.	– Transgender youth: n = 148 – Cisgender siblings: n = 88 – Age- and gender-matched controls: n = 139 Total = 375 participants aged 8–14 years (mean 10.5 ± 1.0). Demographics: 71% White, 18% multiracial/other, 4% Asian, 2% Black, 2% Hispanic. Gender distribution: 227 girls (60.5%), 148 boys (39.5%). Income: 48% > $125,000; 3% < $25,000. Attrition: not applicable (single time-point).	Community or Convenience Sample	Participants recruited 2014–2020 from North American community networks, support groups, social media, and snowball referrals. Eligible youth 8–14 years old; transgender group fully socially transitioned; sibling and control groups age- and gender-matched. Parental consent and child assent obtained; IRB approval from University of Washington.	Social transition,Family (Lack of) Support / Family therapy	“Socially transitioned transgender youth who identify and live as a gender different from their sex assignment at birth; families recruited from supportive community networks.”	checked	Cisgender siblings and age-matched cisgender controls.	Mental Health (individual),Psychosocial functioning (relational)	Baseline/Cross sectional	– Measures: NIH PROMIS Pediatric Short Forms for Depression and Anxiety (child self-report) and parent-proxy forms. – Scoring: T-scores (mean 50, SD 10; 40–60 normative range). – Statistical analysis: One-way ANOVA and Tukey post hoc tests comparing means across groups; α = .05			Parents reported higher rates of anxiety in transgender youth than in control participants (mean [SD] PROMIS score: 52.62 [9.41] vs 49.94 [8.84]; P = .04, d = 0.29) but not siblings (50.23 [9.32] vs 49.94 [8.84]; P = .13, d = 0.25). Siblings did not differ from control participants (52.41 [8.82] vs 50.53 [8.25]; P = .97,d = 0.03). OR parents reported higher rates of anxiety in transgender youth t…		This research was supported by the National Institute of Health (grant HD092347). Dr Olson also receives funding from the National Science Foundation, the Arcus Foundation, and the MacArthur Foundation.	Full declaration	Dr Olson reported receiving grants from NIH, NSF, and Arcus Foundation during the conduct of the study; receiving a MacArthur Foundation fellowship outside the submitted work; travel fees for academic talks; and serving as an unpaid expert witness and advisory board member for LGBTQ organizations. No other disclosures were reported.	Community sample of socially transitioned youth rather than clinic-referred population; high parental education and income levels. Provides evidence of normative-range anxiety and depression among socially supported transgender youth. Summary: Cross-sectional US study (N = 375, ages 8–14) comparing socially transitioned transgender youth, siblings, and controls. No group differences in self-repor…	1
10.1093/ejendo/lvaf051	GAHT Only	Glintborg, Dorte and Møller, Jens-Jakob Kjer and Rubin, Katrine Hass and Christensen, Louise Lehmann and Andersen, Marianne Skovsager	2025	Autoimmune diseases in 3812 Danish transgender persons and 38 120 cisgender controls before and after transgender care: a register-based cohort study	European journal of endocrinology	192	4	408–417	Denmark	Controlled Intervention	Retrospective national register-based cohort with case-control	3812 transgender individuals (1993 transmasculine, 1819 transfeminine); 38 120 cisgender controls. Median age at index: 19 yrs (TM), 23 yrs (TF). Median follow-up after index: 4–5 yrs. Age at puberty suppression/GAHT initiation not specified; 52.5% TM and 57.3% TF received GAHT.	Registry Cohort,Record Review	All individuals diagnosed with gender dysphoria (ICD-10 F64*, DZ768E*) in Denmark between 2000–2021, linked via national health and prescription registers. Each case matched to five cisgender controls of the same and opposite birth sex. Participants followed longitudinally before and after first gender dysphoria diagnosis (“index date”).	GAH (Hormones)	Exposure of interest: initiation of transgender care and GAHT (feminising or masculinising). Main outcomes assessed before vs after start of TG care. Within-cohort exposure analysis for GAHT use vs nonuse.	checked	Five age-matched cisgender controls per TG participant for same and opposite birth sex; comparisons pre- and post-index.	Physical health	≥1yr follow-up	longitudinal follow-up pre- and post-index, median 4–5 yrs post-care). 16. Details of outcome assessment Outcomes derived from ICD-10 codes and national prescription data for insulin (A10A) and thyroid medication (H03). Primary outcomes: any autoimmune disease, type 1 diabetes, thyroid disease. Incidence rate ratios (IRR) calculated via generalised estimating equations (GEE).			Pre-TG care: TM: higher type 1 diabetes incidence vs cis female controls (IRR 1.98, 95% CI 1.16–3.36). TF: higher type 1 diabetes (IRR 1.66, 95% CI 1.05–2.61) and any autoimmune disease (IRR 1.35, 95% CI 1.04–1.77) vs cis male controls. Post-TG care: TF: thyroid disease incidence higher vs cis male controls (IRR 1.98, 95% CI 1.09–3.61). TM: autoimmune disease incidence higher vs cis male controls…		Collaboration fund between Odense University Hospital and Rigshospitalet (2019). Region of Southern Denmark. Forskningsrådet.	"No conflicts" declaration		Methodological strengths: complete national coverage, large matched cohort, linkage to prescription data. Limitations: only includes TG persons in clinical care; limited follow-up; possible misclassification of assigned sex; excludes self-medicated GAHT. Autoimmune outcomes may be underestimated or subject to surveillance bias. Summary Nationwide Danish register-based cohort of 3812 transgender p…	0
10.1210/clinem/dgae351	PB+ GAHT	Glintborg, Dorte and Møller, Jens-Jakob Kjer and Rubin, Katrine Hass and Lidegaard, Øjvind and T'Sjoen, Guy and Larsen, Mie-Louise Julie Ørsted and Hilden, Malene and Andersen, Marianne Skovsager	2024	Gender-Affirming Treatment and Employment Rate in 3812 Danish Transgender Persons and 38 120 Controls	The Journal of clinical endocrinology and metabolism	109	12	3076-3086	Denmark	Cross-sectional or Obervational Cohort	Retrospective national register–based comparative cohort study	3812 transgender persons (1993 trans men, median age 19; 1819 trans women, median age 23) 38,120 cisgender controls (5:1, age- and birth-sex matched) Subgroup: ≤17 years at diagnosis (819 trans men, 323 trans women)	Registry Cohort	National cohort of all individuals with ICD-coded transgender diagnosis, including adolescents evaluated at the Copenhagen gender clinic (<18s). Matched cisgender controls identified through civil registry.	Puberty Blockers,GAH (Hormones)	Exposure defined as prescription and redemption of feminizing or masculinizing hormones (ATC codes). Adolescents (≤17) who initiated GAHT were followed into early adulthood, enabling long-term outcome assessment.	checked	cisgender controls (same birth sex and age, 5:1 ratio).	Psychosocial functioning (relational),Mental Health (individual)	≥1yr follow-up	Employment Classification Module (register data; employed = wage-earner, student, retired; unemployed = out of work/early retirement/unknown). Mental health assessment: Registry-based: ICD-10 psychiatric diagnoses (depression F32–33, anxiety F40–41, self-harm X60–X84, substance use F10–19, psychotic disorders F20–29, bipolar/mood F30–39) and/or ≥2 redeemed prescriptions for psychopharmacological …			For adolescents ≤17 at diagnosis: • Employment rate nearly universal pre-baseline (~98%), dropped at 5 yrs as participants left school (63% trans men; 56% trans women vs ~89% cis controls). • OR for employment at 5 yrs: 0.25 (0.17–0.38) for trans men vs cis women; 0.21 (0.13–0.34) for trans women vs cis men. GAHT predicted improved long-term employment among trans men (5-yr OR 1.61, 95% CI 1.08–2…		Odense University Hospital & Rigshospitalet collaboration fund, Region of Southern Denmark, Danish Research Council.	"No conflicts" declaration		Summary: This nationwide cohort in Denmark included adolescents who began GAHT under 18 and tracked their outcomes into adulthood. While transgender youth had lower employment rates than cisgender controls as they transitioned out of school, those who accessed masculinizing GAHT had significantly higher odds of employment during follow-up, suggesting a protective effect of treatment on socioecono…	0
10.1007/s10826-024-02832-z	Psychosocial	González-Mendiondo, Lucia and Moyano, Nieves and Mayor, Aingeru	2024	"I Don't Want to be a Girl. I Am a Girl!" Experiences Before, During and After Transition in Families with Trans Children and Adolescents.	Journal of Child & Family Studies	33	6	1695-1711	Spain	Qualitative	Qualitative thematic analysis of written parental life stories	n = 22 parent-written life stories Children’s ages at transition: 3–16 years Ages at time of writing: 4–18 years Some adolescents had begun puberty blockers and/or cross-sex hormones (e.g., 4 cases with blockers, 3 with hormones). Parents: All heterosexual; mostly couples cohabiting; 1 single-parent household	Community or Convenience Sample	Target group: Trans children and adolescents (ages 4–18) who had socially transitioned, as described by their parents Context: Families who were members of a Spanish parent support organisation	Social transition	Social transition (before, during, and after), as experienced by children and parents			Mental Health (individual),Psychosocial functioning (relational)	≥1yr follow-up	Data source: Parent-written narratives (life stories)		checked		Children’s wellbeing: Negative emotions, somatisation, suicidal ideation before transition; improved happiness, integration, academic performance after transition. Parents’ journey: From denial and confusion to acceptance and advocacy, often facilitated by peer family networks and professionals. Family dynamics: Siblings and grandparents often shifted from mixed responses to strong support. Ongoi…	“Funding for open access publishing: Universidad de Jaén/CBUA.”	"No conflicts" declaration		Summary Qualitative narrative study, Spain; 22 parent-written life stories of trans children/adolescents aged 4–18. Before social transition, children showed distress, parents reported denial and confusion. During social transition, disclosure and name choice marked turning points, with relief and joy for children and gradual parental acceptance. After transition, wellbeing improved, though famil…	0
10.1016/j.psyneuen.2021.105358	GAHT Only	Grannis, Connor and Leibowitz, Scott F and Gahn, Shane and Nahata, Leena and Morningstar, Michele and Mattson, Whitney I and Chen, Diane and Strang, John F and Nelson, Eric E	2021	Testosterone treatment, internalizing symptoms, and body image dissatisfaction in transgender boys.	Psychoneuroendocrinology	132	105358	105358	USA	Cross-sectional or Obervational Cohort	Cross-sectional comparative study of transgender adolescent boys receiving testosterone versus untreated peers	N = 42 transgender boys (19 on testosterone; 23 untreated). Ages 15.75 (SD 1.47) untreated, 17.03 (SD 1.24) treated. One participant identified non-binary, all others male. All received behavioural health support; none had pubertal blockers. Exclusions as above.	Specialist gender clinic	Recruited from a gender development clinic at a large children’s hospital (Dec 2018–Mar 2020). Eligibility: diagnosis of gender dysphoria by licensed mental health provider, ages 9–21, MRI-compatible. 85 approached, 66 consented. Analysis limited to 47 assigned female at birth; final analytic sample = 42 (19 testosterone-treated; 23 untreated). Exclusions: 4 protocol non-completions, 1 chromosoma…	GAH (Hormones)	Intramuscular testosterone cypionate vs. no gonadal hormone treatment.	checked	Untreated group (not receiving testosterone). Reasons: awaiting initiation, pending endocrinology referral, caregiver non-support, lack of interest, or mixed reasons.	Gender dyphoria/body satisfaction/body image,Mental Health (individual)	<1yr follow-up,≥1yr follow-up	Outcomes were collected at a single research visit after ≥ 6 months (mean ≈ 13 months) of testosterone exposure; untreated comparators were assessed at the same visit without prior GAH. Measures included validated self-reports (SCARED, LSAS, CDI, SBQ-R, Body Image Scale) and fMRI during a face-processing task at that same timepoint. Anxiety: SCARED (generalised anxiety), LSAS (social anxiety) Dep…			Testosterone group had lower anxiety (p=0.01), social anxiety (p<0.001), and depression (p=0.01). Trend for lower past-year suicidality (p=0.06). No group differences in NSSI or lifetime suicidality. Testosterone group reported significantly less body dissatisfaction (p<0.01). Neuroimaging: greater left amygdala activation and stronger right amygdala–vmPFC connectivity in testosterone group. Body…		Support for REDCap is provided by a Vanderbilt Institute for Clinical and Translational Research grant (UL1 TR000445 from the National Center for Advancing Translational Sciences/National Institutes of Health) from the National Institutes of Health (NIH). Funding was provided by internal funds from the Abigail Wexner Research Institute at Nationwide Children’s Hospital.	"No conflicts" declaration		Summary Cross-sectional study in USA of 42 transgender adolescent boys (19 on testosterone, 23 untreated). Testosterone treatment associated with lower anxiety, depression, suicidality (trend), less body dissatisfaction, and differences in amygdala-prefrontal connectivity. Relevance for Guidelines Supports guideline recommendations that testosterone treatment in adolescents is associated with imp…	4
10.1016/j.psyneuen.2023.106319	GAHT Only	Grannis, Connor and Mattson, Whitney I and Leibowitz, Scott F and Nahata, Leena and Chen, Diane and Strang, John F and Thobe, Heather and Indyk, Justin A and Nelson, Eric E	2023	Expanding upon the relationship between gender-affirming hormone therapy, neural connectivity, mental health, and body image dissatisfaction.	Psychoneuroendocrinology	156	106319	106319	USA	Cross-sectional or Obervational Cohort	Cross-sectional comparative study of TG/NB adolescents receiving versus not receiving gender-affirming hormone therapy	N = 82 TNBAFAB: 50 (21 GAHT+, 29 GAHT–) TNBAMAB: 32 (15 GAHT+, 17 GAHT–) Ages: mean 15–17 across groups (GAHT+ TNBAFAB mean 17.0y; GAHT– TNBAFAB mean 15.2y; GAHT+ TNBAMAB mean 17.6y; GAHT– TNBAMAB mean 16.3y). Some participants (n=13) on puberty blockers or spironolactone monotherapy were counted as GAHT–.	Specialist gender clinic	TNB adolescents aged 9–21 recruited 2018–2022 from a large children’s hospital gender development clinic. Eligibility: diagnosis of gender dysphoria via specialist evaluation, no MRI contraindications. 101 approached, 83 consented, 82 enrolled.	GAH (Hormones)	Testosterone, estradiol, puberty blockers (GnRHa, spironolactone).		Internal: GAHT+ vs GAHT– within TNBAFAB and TNBAMAB subgroups.	Mental Health (individual),Gender dyphoria/body satisfaction/body image	Baseline/Cross sectional	Anxiety: SCARED (Screen for Child Anxiety Related Emotional Disorders) Social anxiety: Liebowitz Social Anxiety Scale (LSAS) Depression: Children’s Depression Inventory (CDI) Suicidality: Suicidal Behaviors Questionnaire-Revised (SBQ-R) past-year ideation/attempt Body image dissatisfaction: Lindgren & Pauly scale fMRI: amygdala activation and amygdala–vmPFC functional connectivity during emotiona…			GAHT+ TNBAFAB reported significantly lower depression (CDI mean 13.4 vs 18.3; F=5.62, p<0.05), social anxiety (LSAS mean 50.2 vs 78.6; F=14.8, p<0.01), and suicidality (mean 2.0 vs 2.9; F=3.05, ns trend) than GAHT– TNBAFAB. No GAHT effect in TNBAMAB, but longer estrogen duration predicted fewer suicidality symptoms (F=16.69, p<0.001, η²=0.35) and lower depression (F=5.45, p<0.05). GAHT associated…		Support for REDCap is provided by a Vanderbilt Institute for Clinical and Translational Research grant (UL1 TR000445 from the National Center for Advancing Translational Sciences/National Institutes of Health). Funding was provided by internal funds from the Abigail Wexner Research Institute at Nationwide Children’s Hospital.	"No conflicts" declaration		Summary Cross-sectional US study of 82 transgender and non-binary adolescents and young adults (ages 9–21) attending a gender clinic. Participants were compared based on whether they were using GAHT (testosterone or estrogen) or not. Those on testosterone (transmasculine youth) reported fewer symptoms of depression and social anxiety, and lower body image dissatisfaction, compared to those not ye…	3
10.1080/26895269.2024.2366881	Psychosocial	Grant, Ruby and Amos, Natalie and Lin, Ashleigh and Cook, Teddy and Hill, Adam O. and Pang, Ken and Skinner, Rachel S. and Carman, Marina and Bourne, Adam	2024	Mental health and wellbeing outcomes associated with social, medical, and legal gender affirmation among trans young people in australia	International Journal of Transgender Health	27	1	289-301	Australia	Cross-sectional or Obervational Cohort	Cross‑sectional national survey with multivariable regression analysis.	n = 1,697 TGD youth Age distribution: 56% aged 14–17, 44% aged 18–21. Gender identities: 72% nonbinary, 24% trans men, 4% trans women.	Community or Convenience Sample	Trans and gender-diverse youth aged 14–21 years living in Australia. Data drawn from the Writing Themselves In 4 national survey (2019–2020). Recruitment via online advertising, social media, and community/LGBTQA+ organisations. Inclusion: respondents identifying as transgender or gender-diverse, within age criteria, who completed relevant survey modules. Survey was anonymous and self-administere…	Family (Lack of) Support / Family therapy	Feeling supported to affirm gender socially, medically, or legally (self-reported experience of affirmation support). (The authors do not operationalise who is providing this support, although in the discussion they mention 'e.g., families, peers, or health providers').			Mental Health (individual),Psychosocial functioning (relational)	Baseline/Cross sectional	Mental health: Suicidality/self-harm: self-reported survey items (past 12 months). Psychological distress: Kessler-10 (K10). Anxiety: Generalized Anxiety Disorder-7 (GAD-7). Happiness: Subjective Happiness Scale (SHS). Psychosocial: Homelessness: self-reported (ever/current/past 12 months). Harassment: self-reported verbal, physical, sexual harassment (past 12 months).			Mental health: Support to affirm gender (medical, legal, social) associated with significantly lower odds of suicidal ideation, suicide attempt, and self-harm (aOR 0.27–0.64). Support linked to lower psychological distress (K10), lower anxiety (GAD-7), and higher happiness (SHS). Psychosocial: Support linked to lower odds of homelessness (aOR 0.34–0.58). Support associated with lower odds of verb…		Victorian Government Department of Premier and Cabinet; New South Wales Department of Health; ACT Office for LGBTIQ+ Affairs; SHINE SA (supported by the Office of the Chief Psychiatrist, SA). Secondary analyses funded by the Australian Institute of Health and Welfare. AL was supported by a National Health and Medical Research Council (NHMRC) Investigator Grant (#2010063).	"No conflicts" declaration		Summary: This large national survey of Australian TGD youth found that feeling supported to affirm gender—socially, medically, or legally—was strongly associated with better mental health outcomes, including reduced suicidality, self-harm, and psychological distress, and improved happiness. Support was also linked to reduced harassment and homelessness, underscoring its role as a protective facto…	0
10.1016/j.jadohealth.2021.10.036	GAHT Only	Green, Amy E and DeChants, Jonah P and Price, Myeshia N and Davis, Carrie K	2022	Association of Gender-Affirming Hormone Therapy With Depression, Thoughts of Suicide, and Attempted Suicide Among Transgender and Nonbinary Youth.	The Journal of adolescent health : official publication of the Society for Adolescent Medicine	70	4	643-649	USA	Cross-sectional or Obervational Cohort	Cross-sectional compartive survey (GAHT vs want GAHT and not receiving)	N=11,914 transgender/nonbinary youth (13–24). Subsample <18: n=3,235 with GAHT data (age range 13–17, mean 16.0 yrs). GAHT groups: 14% receiving GAHT, 50% wanted GAHT but not receiving, 36% did not want GAHT. Among <18 group: 274 receiving GAHT, 2,961 wanted GAHT but not receiving.	Internet,Community or Convenience Sample	Data from The Trevor Project’s 2020 National Survey on LGBTQ Youth Mental Health. Recruited via social media (Facebook, Instagram, Snapchat). Inclusion: aged 13–24, LGBTQ, U.S. resident. Analysis restricted to 11,914 transgender/nonbinary youth. For subgroup 13–17 years (n=3,235 with GAHT data), waiver of parental consent obtained.	GAH (Hormones)	Receipt of gender-affirming hormone therapy (GAHT) compared with wanting GAHT but not receiving it.	checked	Internal: Youth who wanted GAHT but did not receive it.	Mental Health (individual)	Baseline/Cross sectional	Depression: Patient Health Questionnaire-2 (PHQ-2), cutoff ≥3. Suicidality: CDC Youth Risk Behavior Survey items (past-year suicide ideation and attempts). Analyses adjusted for demographics, parental support, victimization, conversion efforts, puberty blocker history.			Findings specific to the 13–17 year-old subgroup: Depression: GAHT group 61% vs 77% non-GAHT; adjusted odds ratio (aOR) = 0.61, p<0.01. Past-year suicide attempt: GAHT group 16% vs 27% non-GAHT; aOR = 0.62, p<0.05. Past-year suicidal ideation: GAHT group 51% vs 61% non-GAHT; aOR = 0.74, ns (p=0.08).		“This research did not receive any specific grant from funding agencies in the public, commercial, or not-for-profit sectors.”	"No conflicts" declaration		Summary Cross-sectional survey of 3,235 transgender/nonbinary adolescents (13–17) in the U.S. examined associations between GAHT receipt and mental health. Adolescents on GAHT had significantly lower odds of depression and suicide attempts compared with those who wanted but did not receive GAHT. No significant association for suicidal ideation after adjustment. Relevance for Guidelines The findin…	5
10.1016/j.jpag.2021.04.004	PB+ GAHT	Grimstad, Frances and Kremen, Jessica and Shim, Jessica and Charlton, Brittany M. and Boskey, Elizabeth R.	2021	Breakthrough Bleeding in Transgender and Gender Diverse Adolescents and Young Adults on Long-Term Testosterone.	Journal of Pediatric & Adolescent Gynecology	34	5	706-716	USA	Cross-sectional or Obervational Cohort	Retrospective cohort using medical record review	232 transgender and gender diverse adolescents and young adults (age 13–28 years) with uterus/ovaries, on testosterone >1 year	Specialist gender clinic,Record Review	Clinical sample from Boston Children’s Hospital Gender Multispecialty Service (2010–2020). All patients assigned female or intersex at birth with intact uterus/ovaries, on testosterone ≥12 months, with explicit chart documentation of breakthrough bleeding presence/absence.	Puberty Blockers,GAH (Hormones)	Long-term testosterone GAHT (>1 year). (Breakthrough bleeding defined as uterine bleeding after 12 months on T).			Physical health,Adverse Events	≥1yr follow-up	Clinician chart documentation of uterine bleeding after ≥12 months on testosterone; serum testosterone/estradiol levels; occasional pelvic ultrasound, pregnancy tests, STI screening, and limited external genital exams.			Mean T initiation age 16.3 yrs. 25% (58/232) had ≥1 episode of breakthrough bleeding after 1 yr on T. Bleeding onset: mean 24.3 months after T start; mean age at bleeding 18.4 yrs. Risk factors: longer duration on T (37 vs 28 months, p<.001), higher prevalence of endometriosis (5% vs <1%, p=.049). 20% had bleeding unrelated to missed doses or withdrawal from menstrual suppression. No significant …		No funding was received for this work. Dr. Charlton was supported by grant MRSG CPHPS 130006 from the American Cancer Society.	"No conflicts" declaration		Summary: This US retrospective cohort of 232 transgender adolescents and young adults found that one in four experienced breakthrough bleeding more than a year after starting testosterone. Bleeding typically began about two years after treatment initiation and was more common with longer T duration and in those with endometriosis. No management strategy proved consistently effective, though dose …	3
10.1089/lgbt.2020.0355	PB+ GAHT	Grimstad, Frances W and Knoll, Michelle M and Jacobson, Jill D	2021	Oxandrolone Use in Trans-Masculine Youth Appears to Increase Adult Height: Preliminary Evidence.	LGBT health	8	4	300-306	USA	Cross-sectional or Obervational Cohort	Retrospective comparative cohort using medical record review	204 trans-masculine patients identified; 154 reached adult height and included. Subgroups: • 34 received oxandrolone (median initiation age 14.6 yrs). • 42 reached adult height before GAHT. • 14 no treatment. • 120 other treatments (GnRHa, testosterone, progesterone, etc.). Predominantly White/Caucasian (83.8%).	Specialist gender clinic,Record Review	Patients with ICD-coded gender dysphoria (assigned female at birth, identified as trans-masculine) seen at a single paediatric academic gender clinic between 2013–2018. Inclusion: those with final adult height data available. Exclusions: comorbid conditions affecting height (n=9), insufficient data (n=6), still growing at follow-up (n=35).	GAH (Hormones),Puberty Blockers	Oxandrolone (2.5–10 mg daily, titrated), with or without GnRHa; testosterone; progesterone; GnRHa alone; or no treatment.		Y (subgroup comparisons: early vs late oxandrolone; oxandrolone vs no treatment; oxandrolone vs other therapies)	Physical health	≥1yr follow-up	Outcome timing: Long-term (>5 yrs for some); adult height measured after growth completion (height velocity <0.5 cm/yr). Adult height measured with stadiometer in triplicate; bone age (Greulich & Pyle or Tanner-Whitehouse); mid-parental height calculated. Correlations with age at therapy initiation assessed.			Each earlier year of oxandrolone initiation associated with +2.3 cm adult height (p=0.001). Early oxandrolone group mean adult height: 169.6 ± 6.4 cm vs late oxandrolone: 162.1 ± 6.0 cm (p<0.001). Early oxandrolone taller than no treatment (164.6 ± 4.8 cm, p=0.02) and other regimens (163.9 ± 6.5 cm, p<0.001). 53% of early oxandrolone group achieved ≥168.8 cm (within 1 SD below male CDC mean) vs 6…		“No funding was received for this article.”	"No conflicts" declaration		Summary Retrospective chart review of 154 trans-masculine youth with adult height data. Early oxandrolone (median age 13.1 yrs) was associated with significantly taller adult height than late oxandrolone initiation, no treatment, or other therapies. Each year earlier initiation correlated with an additional 2.3 cm adult height gain. Only mild transient liver enzyme elevations were observed. Relev…	4
10.1080/00918369.2019.1696103	Psychosocial	Grossman, Arnold H and Park, Jung Yeon and Frank, John A and Russell, Stephen T	2021	Parental Responses to Transgender and Gender Nonconforming Youth: Associations with Parent Support, Parental Abuse, and Youths' Psychological Adjustment.	Journal of homosexuality	68	8	1260-1277	USA	Cross-sectional or Obervational Cohort	Cross‑sectional quantitative survey study	N=129 TGNC youth, ages 15–21 (mean=18.0, SD=1.74). Subgroups: transfeminine (n=58), transmasculine (n=71). Racially and ethnically diverse sample: 32.6% White, 31.8% Black, 8.5% Native American, 7.8% Asian, 16.3% multiracial, 31.8% Latino/Hispanic.	Community or Convenience Sample	Youth recruited 2011–2012 through LGBTQ organizations, colleges, Pride events, and snowball sampling. Surveys were administered in person; under-18s provided assent with youth advocate present.	Family (Lack of) Support / Family therapy	Parental responses to youth’s gender identity (initial vs current). Parent support. Parental abuse (verbal/physical).			Mental Health (individual),Psychosocial functioning (relational)	Baseline/Cross sectional	Depressive symptoms: Beck Depression Inventory–Youth (BDI-Y). Parental support: Child and Adolescent Social Support Scale (CASSS). Abuse: Child and Adolescent Psychological Abuse Measure. Disclosure stress: modified LGBTQ Coming-Out Stress Scale.			Positive parental responses increased over time for transmasculine youth (mothers: 27% → 53%, p<.001; fathers: 21% → 45%, p<.001). Higher parent support correlated with less parental abuse (verbal r=−.51 TF; −.43 TM; physical r=−.45 TF; −.34 TM). Parent support correlated with fewer depressive symptoms (TF r=−.33, p=.013; TM r=−.27, p=.024). Parent support correlated with less disclosure stress (…		This study uses data from ‘Risk and Protective Factors for Suicide among Sexual Minority Youth,’ grant R01MH091212 from the National Institutes of Mental Health (NIMH). The content is solely the responsibility of the authors and does not represent the official views of NIMH or the Institutes of Health	No mention of COI		Summary U.S. survey of 129 TGNC youth (ages 15–21, including minors) examined parental responses about their child’s gender identity and youth mental health. More supportive parents were linked with less verbal and physical abuse, fewer depressive symptoms, and lower stress about disclosing identity. Parental responses often became more positive over time, especially for transmasculine youth, but…	0
10.1210/clinem/dgad306	PB+ GAHT,GAHT Only	Gupta, Pranav and Patterson, Briana C and Chu, Lena and Gold, Sarah and Amos, Seth and Yeung, Howa and Goodman, Michael and Tangpricha, Vin	2023	Adherence to Gender Affirming Hormone Therapy in Transgender Adolescents and Adults: A Retrospective Cohort Study.	The Journal of clinical endocrinology and metabolism	108	11	e1236-e1244	USA	Cross-sectional or Obervational Cohort	Retrospective multicenter cohort with survival analysis.	N = 385 total. Pediatric cohort = 121 (initiated <18, mean age 15). Adult cohort = 264 (mean age 32). Pediatric cohort: 55% transmasculine. Follow-up: mean 24 months (pediatric), 64 months (adult). Attrition: 77 disenrolled, 26 recontacted; 5 participants lost to <1 month follow-up rounded up.	Specialist gender clinic	Retrospective chart review at two academic centres (Children’s Healthcare of Atlanta for adolescents, Emory Healthcare for adults) between 2000–2019. Eligibility: TGD identity confirmed, prescribed estradiol or testosterone. Excluded if receiving only GnRH analogues, progestins, spironolactone, or hormones for DSD. Attrition: 77 disenrolled, of whom 26 were recontacted.	GAH (Hormones),Treatment trajectory/Discontinution/Detrans	Estradiol or testosterone initiated as GAHT, continuation vs discontinuation patterns, reasons for discontinuation.			Tx trajectory/Persistance/Desistance/Satisfaction/Regret	≥1yr follow-up	Outcome timing: ≥1 yr; Long-term (>5 yrs) (retrospective follow-up mean 51 months, max 19 years) Details of outcome assessment: Chart review for prescription refills, provider notes, disenrolment dates. Phase 2: follow-up contact by email/phone to ascertain reasons for discontinuation.			Overall discontinuation rate: 1.6% (6/385) during follow-up; only 2 stopped permanently. Pediatric cohort: 1 discontinuation in main analysis (later 4 in sensitivity analysis after recontacts). Kaplan–Meier survival analyses: no significant difference by age or sex assigned at birth (p = .82 by age, p = .36 by sex). Sensitivity analysis: 9 discontinuations total; higher (non-significant) risk amo…	Key qualitative themes (reasons for discontinuation): Discontinuation reasons included: change in gender identity, financial barriers, bullying, venous thrombosis, medical comorbidity, conception, and transition to non-binary identity. Adults who permanently discontinued did not regret initiation; instead, they viewed GAHT as part of gender exploration. Adolescents who discontinued expressed no r…	“This work was supported by the Washaw Fellow Research Award from the Emory Department of Pediatrics and Children’s Healthcare of Atlanta. Dr. Tangpricha is supported by the National Center for Advancing Translational Sciences of the National Institutes of Health under Award Number UL1TR002378. Drs. Goodman and Tangpricha received past/current research support from the Patient-Centered Outcomes R…	"No conflicts" declaration		Summary Retrospective cohort study in the USA of 385 TGD individuals (121 <18 at initiation, mean age 15). Examined persistence and discontinuation of estradiol/testosterone GAHT over up to 19 years. Very low permanent discontinuation (0.5%). Reasons included social and financial barriers, health complications, identity changes, and fertility (temporary pause to conceive). Importantly, no adolesc…	4
10.1097/SAP.0000000000003981	Surgery Only	Hassan, Bashar and Zeitouni, Ferris and Ascha, Mona and Sanders, Renata and Berger, Zackary and Fields, Errol and Liang, Fan	2024	Breast Surgery in Adolescents: Cisgender Breast Reduction Versus Transgender and Nonbinary Chest Masculinization.	Annals of plastic surgery	93	2	194-199	USA	Cross-sectional or Obervational Cohort	Retrospective NSQIP registry study; cisgender breast reduction vs TGNB chest surgery	Overall: N=2504 adolescents ≤18 years (2018–2021). Cisgender BRS group: N=2186 (87.3%), mean age 16.7 (SD 1.2), minimum age 12.1–12.6. TGNB CMS group: N=318 (12.7%), mean age 17.4 (SD 0.9), minimum age 14.0–15.1.	Registry Cohort	Patients identified in the American College of Surgeons National Surgical Quality Improvement Program (NSQIP) Pediatric and Adult databases (2018–2021). TGNB cases flagged using ICD-10 codes for gender dysphoria and CPT codes for breast reduction/mastectomy with primary diagnosis of GD. Cisgender cases flagged by CPT codes for breast reduction without GD codes. Excluded >18 years, cis boys underg…	"Surgery (top, bottom, or other)"	“Breast reduction surgery (BRS) in cisgender adolescent girls and chest masculinization surgery (CMS) in transgender and nonbinary adolescents”	checked	Cisgender BRS vs TGNB CMS adolescents.	Physical health,Adverse Events	<1yr follow-up	Outcomes: SSI, wound dehiscence, bleeding requiring transfusion, sepsis, unplanned reoperation, unplanned readmission, composite “≥1 complication.” Defined per ACS NSQIP Participant Use Data File. Timing: 30 days postop.			Complication rates similar: 5.1% BRS vs 4.4% CMS (P=0.681). SSI more common in BRS (3.4%) vs CMS (1.3%, P=0.022). Hematoma requiring reoperation more common in CMS (1.9%) vs BRS (0.5%, P=0.011). Unplanned readmission: 1.5% BRS vs 0.3% CMS (NS). Multivariate regression: CMS not associated with increased odds of complications vs BRS (aOR 1.19, 95% CI 0.65–2.18, P=0.566). Demographics: TGNB adolesce…		None (quantitative only).	"No conflicts" declaration	“Conflicts of interest and sources of funding: none declared.”	Notes: Comparative registry analysis of adolescent BRS vs CMS. Both procedures share comparable complication rates, but access disparities noted: cisgender BRS performed more frequently and at younger ages, whereas CMS is delayed and restricted. Summary: US registry-based study (N=2504; 2018–2021) comparing cisgender adolescent breast reduction (n=2186) with TGNB chest masculinization (n=318). Co…	0
10.7759/cureus.45948	Surgery Only	Hassan, Bashar and Zeitouni, Ferris and Ascha, Mona and Sanders, Renata and Liang, Fan	2023	Temporal Trends in Gender Affirmation Surgery Among Transgender and Non-Binary Minors.	Cureus	15	9	e45948	USA	Cross-sectional or Obervational Cohort	Retrospective registry study using ACS-NSQIP paediatric data with no control group	108 minors (≤17y) undergoing gender-affirming surgery, 2018–2021; mean age 16.9y (SD 0.8, range 13.9–18). Two patients were under age 15. Most were assigned female at birth and undergoing chest masculinisation. Race/ethnicity: 48% White, 9% Hispanic, 1% Black, 4% Asian, remainder unknown/unspecified. Procedures: Chest masculinization n=102 (94.4%); hysterectomy n=4 (3.7%); vaginectomy n=1 (0.9%);…	Registry Cohort	Patients aged ≤17 identified from ACS NSQIP Pediatric database (2018–2021) using ICD-9/10 codes for gender dysphoria and CPT codes for GAS procedures. Includes inpatient and outpatient procedures across multiple institutions.	"Surgery (top, bottom, or other)"	“Chest masculinization, hysterectomy, vaginectomy, and facial feminization procedures among TGNB minors identified in the ACS NSQIP Pediatric registry” Procedures: chest masculinisation 94.4% (n=102), hysterectomy 3.7% (n=4), vaginectomy 0.9% (n=1), facial feminisation 0.9% (n=1).			Physical health,Adverse Events	<1yr follow-up	Outcomes: mortality, bleeding requiring transfusion, sepsis, unplanned reoperation, unplanned readmission, unplanned intubation/extubation, SSI, wound dehiscence. Definitions per ACS NSQIP Pediatric Participant Use Data File. Timing: 30 days post-op.			Increase in procedures from 4 in 2018 to 59 in 2021 (+1375%, P<.001). GAS frequency ↑ 1,375% from 2018 (n=4) to 2021 (n=59). Majority outpatient for CMS (57%). Operating time mean 143 min; median LOS 0 days (IQR 0–1). Major complications: none (0%). Minor complications: unplanned reoperation for hematoma (n=3, 2.8%); SSI (n=1, 0.9%); wound dehiscence (n=1, 0.9%). No deaths, transfusions, or sepsi…		None reported	"No conflicts" declaration	“All authors have declared that they have no financial relationships at present or within the previous three years with any organizations that might have an interest in the submitted work.”	First multi-institutional NSQIP Pediatric analysis of GAS in minors. Shows exponential growth in cases but still low absolute numbers. Predominantly CMS, with rare hysterectomy/vaginectomy. Limitations: 30-day outcomes only; incomplete race/ethnicity data; registry lacks gender identity detail. Summary: US registry-based study (N=108 minors, 2018–2021) of GAS in youth ≤17. Procedures primarily CM…	0
10.1016/j.jsxm.2021.05.014	PB+ GAHT	Hisle-Gorman, Elizabeth and Schvey, Natalie A and Nylund, Christopher M and Danner, Robert and Susi, Alyson and Klein, Daniel A	2021	Mental Health Care Utilization Before and After Initiation of Gender-Affirming Treatment in Transgender Adolescents	The journal of sexual medicine	18	8	1444-1454	USA	Cross-sectional or Obervational Cohort	Retrospective comparative cohort study using electronic health and pharmacy records	N = 3 754 transgender and gender diverse (TGD) adolescents (mean age 15.2 ± 2.1 years; 47.8 % assigned female at birth) and 6 603 cisgender siblings (mean age 15.7 ± 2.3 years) used as a comparison group. All participants were dependents of active-duty or retired U.S. military service members. Median follow-up was 2 years after initiation of gender-affirming medical treatment.	Record Review	TRICARE registry of dependents ≤ 18 y with GD diagnosis + prescriptions for GnRHa or GAH between 2009–2017 and siblings wthout GD Dx Data from the U.S. Department of Defense Military Health System (TRICARE) database. Included dependents ≤ 18 years with a recorded diagnosis of gender dysphoria (ICD-9 302.6/302.85; ICD-10 F64.x) and prescription for puberty suppression (GnRH agonists) or gender-aff…	Puberty Blockers,GAH (Hormones)	Puberty suppression and gender-affirming hormone therapy prescriptions were identified through pharmacy records for leuprolide or histrelin (PS) and testosterone or estradiol (GAH) in adolescents diagnosed with gender dysphoria.	checked	Each adolescent served as their own control (24 months before vs 24 months after treatment initiation). Analyses also included 6 603 cisgender siblings without gender dysphoria as matched external controls.	Mental Health (individual),Psychosocial functioning (relational)	<1yr follow-up,≥1yr follow-up	Mental-health diagnoses and service use identified from ICD-coded encounters and procedure records in electronic health data. Measured conditions included depression, anxiety, suicidality /self-harm, and psychiatric hospitalisation. Rates were calculated per person-year for the two years before and after first prescription. Analyses used Poisson regression with robust error variance to estimate a…			• Overall mental-health encounters decreased by ≈ 20 % after treatment (ARR ≈ 0.80, 95 % CI 0.76–0.84). • Hospitalizations for mental-health reasons decreased ≈ 31 %. • Diagnoses of depression, anxiety, and self-harm/suicidality all significantly lower post-initiation (p < 0.01 for each). • Cisgender siblings showed no comparable change.		Supported by the Uniformed Services University of the Health Sciences and the Defense Health Program.	"No conflicts" declaration	“The authors declare no conflicts of interest.”	Limitations: Administrative EHR data may miss outside care or contain coding errors; military family sample may limit generalisability. Summary: Large U.S. registry cohort (3 754 TGD adolescents, 6 603 cisgender siblings) found significant reductions in mental-health diagnoses and service use within 24 months after puberty suppression or GAH initiation relative to the two years prior. Relevance f…	5
10.1089/trgh.2021.0006	Puberty Pausers Only	Hobson, Brianna J and Lett, Elle and Hawkins, Linda A and Swendiman, Robert A and Nance, Michael L and Dowshen, Nadia L	2022	Transgender Youth Experiences with Implantable GnRH Agonists for Puberty Suppression.	Transgender health	7	4	364-368	USA	Cross-sectional or Obervational Cohort	Cross-sectional descriptive survey caregivers + record review	N = 36 TGD youth (reported via caregiver survey). Median age at implant: 11.5 yrs (IQR 11–13). Sex assigned at birth: 58% AFAB, 42% AMAB.	Specialist gender clinic,Record Review	Youth with GD who underwent histrelin implantation, replacement, or removal between Jan 2008–May 2019. Outcomes based on linked caregiver survey responses about youth experience and chart review of youth complications.	Puberty Blockers	Puberty suppression: histrelin implant (Supprelin®).			Physical health,Psychosocial functioning (relational)	<1yr follow-up,≥1yr follow-up	Chart review: complications, implant efficacy. Caregiver-reported: youth worry levels before/after procedure. Insurance barriers documented via survey			Complications: rare — one implant failure (inadequate suppression, switched to injectable GnRHa) and one minor wound issue. Recovery: most youth resumed normal activities within 3 days. Psychosocial: youth worry about the procedure fell from 56% pre-implant to 14% post-implant. Structural barriers: insurance denials and affordability challenges were common, directly delaying or limiting youth acc…		This research study was funded by the Children’s Hospital of Philadelphia (CHOP). This project was also supported in part by a grant to Dr. Dowshen from the Stoneleigh Foundation.	"No conflicts" declaration		Summary: Histrelin implants were safe and well tolerated by youth, with rapid recovery and rare complications. Youth worry decreased substantially after implantation, reflecting good acceptability. Relevance for guidelines: Implantable GnRHa are a safe and acceptable option for puberty suppression in adolescents. Access is often constrained by insurance denials and affordability, highlighting the…	1
10.1111/fare.12764	Psychosocial	Horton, Cal	2022	'Euphoria': Trans children and experiences of prepubertal social transition	Family Relations: An Interdisciplinary Journal of Applied Family Studies	73	2	993-1013	United Kingdom (England, Scotland, Wales).	Qualitative	Qualitative inductive reflexive thematic analysis.	30 cisgender parents of 30 socially transitioned children (15 girls, 12 boys, 3 nonbinary). Children transitioned at average age 7 (range 3–10). At parental interview, children average age 11 (range 6–16). 10 trans and non-binary children (average age 12, range 9–16) also interviewed; had socially transitioned on average 4.5 years earlier.	Internet,Community or Convenience Sample	Parents recruited via closed UK parent support groups for families of trans children; snowball sampling extended reach. Researcher positionality as nonbinary parent facilitated access and trust. Parents invited children; 10 chose to participate.	Social transition	Prepubertal social transition (change in name, pronouns, clothing, presentation) vs. pre-transition experiences.			Mental Health (individual),Psychosocial functioning (relational)	Baseline/Cross sectional	Semi-structured interviews (parents: 1–3 hours; children: 20–50 minutes). Topics included family, health, school, transition experiences. Reflexive thematic analysis applied in NVivo.		checked		Pre-transition: Children reported/caregivers observed distress, anger, sadness, withdrawal, and in some cases suicidal ideation (as young as 6–9 years). Many children corrected misgendering, but felt misunderstood. Some hid identity, struggling alone. Post-transition: Parents and children described immediate and sustained relief, joy, and “euphoria.” Children became happier, more confident, bette…	No funding statement	No mention of COI		Summary This UK study drew on interviews with 30 parents of trans children (ages 6–16) and 10 children themselves who had socially transitioned, usually around age 7. Before transition, children often showed distress, sadness, anger, withdrawal, and in some cases suicidal thoughts, while parents struggled to understand the depth of their child’s unhappiness. After transitioning, children describe…	0
10.1080/27703371.2022.2076002	Psychosocial	Horton, Cal	2022	“I Was Losing That Sense of Her Being Happy”—Trans Children and Delaying Social Transition	LGBTQ+ Family: An Interdisciplinary Journal	18	2	187-203	United Kingdom (England, Scotland, Wales).	Qualitative	Qualitative inductive reflexive thematic analysis.	30 parents of 30 socially transitioned trans children. Children transitioned at average age 7 (range 3–10). At time of interview, children aged 6–16 (average 11). All parents cisgender; majority mothers (93%), majority white (90%). Children included 15 trans girls, 12 trans boys, and 3 non-binary children.	Internet,Community or Convenience Sample	Parents of transgender and non-binary children who socially transitioned before puberty. Recruited from UK parent support groups (closed online spaces) + snowball.	Social transition	Timing of social transition; parental experiences of delaying vs. affirming transition.			Mental Health (individual),Psychosocial functioning (relational)	Baseline/Cross sectional	Semi-structured interviews; reflexive thematic analysis; retrospective parental accounts.		checked		Parents described initial dismissal, misinformation, and social pressures that led to delays. Many children showed distress, frustration, and unhappiness when transition was delayed, including tantrums, refusal to leave home, and declining mental health. Parents often regretted delaying, describing it as “cruel” or harmful to their child’s wellbeing. Affirmation led to happier, more confident chi…	No funding statement in article.	"No conflicts" declaration		Summary This UK study interviewed 30 parents of trans children who socially transitioned at an average age of 7 (range 3–10). Parents described how delays—often due to misinformation, fear of social judgment, or professional advice to “watch and wait”—caused their children distress, frustration, and unhappiness. Once supported to socially transition, children became notably happier and more confi…	0
10.1080/26895269.2022.2081645	Psychosocial	Horton, Cal;	2023	Gender minority stress in education: Protecting trans children's mental health in UK schools	International journal of transgender health	24	2	195-211	UK	Qualitative	Semi-structured interviews with trans children and parents	10 trans children (age 9–16, mean ≈ 12) and 30 cisgender parents of socially transitioned trans children (age 6–16). Children had socially transitioned at mean age 7 (range 3–10). Parents 90 % White, 93 % women, 23 % disabled; 60 % heterosexual.	Community or Convenience Sample	Recruited through six closed UK online support groups for parents of trans children; supplemented by snowball sampling. Author was member of several groups and used insider positionality to gain trust. Parents invited children to participate.	Social transition,School experiences	Experiences of Gender Minority Stress within UK primary and early secondary education (ages 3–13), including discrimination, rejection, victimization, non-affirmation, internalized transphobia, non-disclosure, gender dysphoria, and connectedness/pride.			Mental Health (individual),Psychosocial functioning (relational)	Baseline/Cross sectional	Data collected via Microsoft Teams interviews (2 h average parents; 25 min average children). Reflexive thematic analysis applied deductively to GMS categories then inductively for sub-themes.		checked		Discrimination: denied access to facilities, segregation on trips; families with less social capital faced greater burden. Rejection: peer and teacher exclusion worsened in non-affirming schools. Victimization: bullying and harassment frequent; some pupils left school. Non-affirmation: deadnaming/misgendering by peers and teachers; trans-exclusionary curricula. Internalized transphobia / negative…	Self-funded PhD with half fees covered by Goldsmiths University of London Department of Education bursary.	"No conflicts" declaration		– All participants reported multiple forms of Gender Minority Stress in education. – Common themes: discrimination (e.g., toilet access, school trips), rejection (by peers and teachers), victimization (bullying and abuse), non-affirmation (deadnaming, misgendering, cisnormative curricula), non-disclosure stress, puberty-linked dysphoria, and lack of connectedness or trans representation. – Resili…	1
10.1111/head.14493	GAHT Only	Hranilovich, Jennifer A. and Millington, Kate	2023	Headache prevalence in transgender and gender diverse youth: A single‐center case–control study.	Headache: The Journal of Head & Face Pain	63	4	517-522	USA	Case-Control	Retrospective case–control study using medical record review (heaches vs not)	N = 763 TGD adolescents (273 transfeminine, 490 transmasculine). Age range and mean ages not specified beyond adolescent cohort. 45% of transfeminine patients received estrogen; 46% of transmasculine patients received testosterone. Final case sample: 52 with confirmed headache.	Specialist gender clinic,Record Review	All patients seen at Boston Children’s Hospital Gender Multispecialty Service (GeMS) from 2007–2017. Cases defined as patients with headache (identified via diagnostic codes or prescriptions for headache medications), validated by chart review. Controls were those without headache. Excluded patients: not TGD, did not receive estrogen/testosterone, or had panhypopituitarism.	GAH (Hormones)	Exposure was treatment with gender-affirming hormone therapy (i.e., estrogen for transfeminine adolescents and testosterone for transmasculine adolescents).	checked	Within-cohort comparison of those receiving GAHT vs. those not receiving GAHT, separately for transfeminine and transmasculine adolescents.	Physical health	Baseline/Cross sectional	Headache identified by electronic medical record search for diagnostic codes, mention of headache/migraine in notes, or prescriptions for headache medications (sumatriptan, amitriptyline). Validated by manual chart review. Most cases were non-specific mentions, but some were classified as familial hemiplegic migraine, probable migraine with aura, chronic daily headache, concussion-related headach…			7% of transfeminine adolescents on estrogen (9/123) had headache vs. 1% not on estrogen (2/150); OR 5.84 (95% CI 1.24–27.6), p = 0.026. 12% of transmasculine adolescents on testosterone (28/227) had headache vs. 5% not on testosterone (13/263); OR 2.71 (95% CI 1.37–5.4), p = 0.005. Overall confirmed headache prevalence: 52/763 (~7%).		Doris Duke Clinical Foundation Grant 2019119 to Kate Millington. Joan Alfond Fund to the Graham Headache Center. NIH/NINDS Child Neurologist Career Development Program (CNCDP) grant K12NS098482 subaward to Jennifer Hranilovich. NIH/NCRR Colorado CTSI Grant Number UL1 RR025780 to the Colorado Clinical & Translational Sciences Institute (CCTSI) with the Development and Informatics Service Center (D…	"No conflicts" declaration		Summary Single-center retrospective case–control study of 763 TGD adolescents at Boston Children’s Hospital (2007–2017) comparing headache prevalence by GAHT exposure. 7% of transfeminine adolescents on estrogen vs. 1% not on estrogen reported headache; 12% of transmasculine adolescents on testosterone vs. 5% not on testosterone reported headache. Suggests increased odds of headache associated wi…	1
10.1080/26895269.2025.2478498	Surgery Plus	Jessen, Reidar Schei and Wæhre, Anne and David, Linda W. and Stänicke, Line Indrevoll and Stänicke, Erik	2025	“it was actually my family and friends who noticed that my voice changed”: An interview study on the experiences of transgender and non-binary youth and young adults three years into medical treatment	International Journal of Transgender Health			1-15	Norway	Qualitative	Qualitative study using semi-structured life-mode interviews with no control group	N=10, all assigned female at birth. Ages 17–22 at follow-up (3 years after initiating gender-affirming care). 9 binary trans men, 1 non-binary. All on testosterone; 5 had mastectomy, 1 had hysterectomy. Recruitment from Norwegian National Center for Gender Incongruence. Among the 13 who consented to participate in the follow-up interview, two never initiated treatment, and one discontinued after …	Specialist gender clinic,Community or Convenience Sample	Participants were originally part of a 2018 study at the Norwegian National Center for Gender Incongruence. At baseline, 16 AFAB adolescents had been interviewed before treatment initiation. Three years later, 13 consented to follow-up, but only 10 were eligible (all had initiated GAHC).	GAHC general or unspecified,"Surgery (top, bottom, or other)",Menstrual Suppression / Hormonal Contraception,GAH (Hormones)	“All participants pursued hormonal treatment (testosterone); five pursued chest surgery (mastectomy), and one had a hysterectomy. Some participants used menstrual suppression before testosterone.”			Mental Health (individual),Psychosocial functioning (relational),Gender dyphoria/body satisfaction/body image,Sexual function/health/desire	≥1yr follow-up	Data collection: semi-structured life-mode interviews (77–116 mins, avg. 1h40). Thematic analysis (Braun & Clarke, 2019). Domains: decision-making, bodily changes, integration into everyday life.		checked		Pragmatic decision-making: weighing risks vs benefits; gradual step-by-step introduction of interventions. Embodying treatment: bodily changes tangible (voice, hair, fat distribution, clitoral growth); changes anchored masculinity and sense of self. Grounding in everyday life: social support (family, friends, partners) crucial for interpreting changes and identity affirmation. (researcher team di…	“This work was supported by UiO:Norden and the research group Living the Nordic Model under grant number 100008003.”	"No conflicts" declaration	“No potential conflict of interest was reported by the author(s).”	Focused on AFAB trans youth/young adults in Norway, with supportive social context. Limitations include all AFAB sample, mostly binary trans men, well-supported families, and strong welfare-state context. Omiting the 3 who did not pursue medical intervention lost a lot of possibly useful data Summary: Norwegian qualitative follow-up study (N=10, AFAB, ages 17–22). All had testosterone, 5 chest su…	0
10.1016/j.jadohealth.2020.09.029	Non-medical self affirmation	Julian, Jamie M and Salvetti, Bianca and Held, Jordan I and Murray, Paula M and Lara-Rojas, Lucas and Olson-Kennedy, Johanna	2021	The Impact of Chest Binding in Transgender and Gender Diverse Youth and Young Adults.	The Journal of adolescent health : official publication of the Society for Adolescent Medicine	68	6	1129-1134	USA	Cross-sectional or Obervational Cohort	Cross-sectional online survery	N=684 (608 binders; 76 non-binders). Mean age 16 years. Suburban 42.1%, rural 21.7%. 49% not connected to any gender-related services.	Internet	National online survey of transgender and gender-diverse adolescents and young adults aged 13–24 years (designated female at birth or intersex, not post–chest surgery) experiencing chest dysphoria. Recruited via social media, online influencers, and community networks (47 states, 2 U.S. territories). Conducted via REDCap; no personal identifiers collected. Parental consent waived.	Binding/Tucking/Packing,GAHC general or unspecified	Self-initiated chest binding practices among transmasculine and gender-diverse youth, including duration, materials used, and reasons for binding. Non-binders compared for barriers, including parental support and access.	checked	Youth binding vs not binding; subgroup analyses by access to gender-affirming services.	Gender dyphoria/body satisfaction/body image,Physical health,Mental Health (individual),Global functioning/QoL	Unclear	Online questionnaire including: Chest Dysphoria Scale (nonvalidated, 0–51 range), 7-item Life Satisfaction subscale of the Gender Congruence and Life Satisfaction Scale, and questions on physical symptoms and binding practices.			89% of participants were currently binding; 95.9% reported physical effects (back/chest pain 80%, shortness of breath 68%, overheating 61%). Despite effects, 95% continued binding for comfort in public and 96% to achieve a masculine-appearing chest; 64% cited safety in public as a reason. Mean Chest Dysphoria scores: 29.0 (binders) vs 26.3 (non-binders), p=0.025. Mean Life Satisfaction: 3.04 vs 2…		All phases of this study were supported by the Children’s Hospital Los Angeles Institute for Nursing and Interprofessional Research grant.	Full declaration	The Center for Transyouth Health and Development at Children’s Hospital Los Angeles accepts donations from gc2b to ensure that low-resourced youth have access to binders. gc2b is listed as a source for binder purchase on the Centre’s resource guide.	Methodological limitations: non-probability online sample, no validated dysphoria tool, omission of mental health items to preserve ethics waiver, English-only survey. Results may underrepresent rural and low-resource youth. 25. Summary Nationwide online survey (N=684) of transgender and gender-diverse youth aged 13–24 years assessed chest binding practices, effects, and psychosocial impact. Near…	2
10.1089/trgh.2022.0156	PB+ GAHT	Kain, Emily J and Fuqua, John S and Eugster, Erica A	2024	A Retrospective Study of the Use of Gonadotropin-Releasing Hormone Analogs and Testosterone in Transgender Boys: Who, What, When, and for How Long?	Transgender health	9	4	357-360	USA	Cross-sectional or Obervational Cohort	Retrospective comparative cohort using medical record review (GAHT vs GAHT after PS)	N = 101 transgender boys (AFAB youth identifying as male). Mean age at first consult: 14.6 ± 2.3 years (range 7.9–17.8). 87% postmenarchal at presentation. Mean follow-up: 1.8 years (range 0–7).	Specialist gender clinic,Record Review	Referred to endocrinology after psychological evaluation confirmed DSM-5 gender dysphoria. All included if <18 yrs, seen between ~2014–2020.	Puberty Blockers,GAH (Hormones)	GnRHa: 44% prescribed; 34% of those denied by insurance. Types: 3-month leuprolide (62%), histrelin implant (28%), monthly leuprolide (7%), 6-month triptorelin (3%). Mean duration: 1.4 years (0.5–2.2). Mean lag from prescription to start: 136 days (range 16–804). Testosterone: 70% (n=71) initiated during follow-up. Mean age at initiation: 15.8 yrs (range 13.9–17.9). Dosing: typically 50–400 mg/mo…	checked	internal comparator: youth prescribed GnRHa vs not prescribed	Physical health	<1yr follow-up,≥1yr follow-up	Chart review of endocrine clinic records. Recorded: age, menarchal status, type/duration of GnRHa, testosterone dosing, menstrual suppression. Anecdotal behavioral/emotional changes noted in records, not standardized.			GnRHa recipients were younger at presentation (13.7 yrs vs 15.5 yrs, p<.001). No difference in menarchal status between GnRHa vs non-GnRHa (80% vs 93% postmenarchal). Insurance denied GnRHa in 34%; major barrier to access. Avg delay from prescription to initiation: 136 days (>4.5 months). Testosterone alone sometimes insufficient for menstrual suppression: Lowest dose achieving amenorrhea = 50 mg…		No funding was received for this article.	"No conflicts" declaration		Summary: This retrospective US study of 101 transmasculine adolescents found that most presented postmenarchal, with significant delays in access to GnRHa due to insurance denials and long approval processes. GnRHa use was often short-term, due to late presentation and youth initiating testosterone within 1–2 years. Testosterone alone was variably effective for menstrual suppression, with some yo…	0
10.1001/jamapediatrics.2023.0656	Puberty Pausers Only	Karamanis, Georgios; Frisell, Thomas; Holmberg, Mats; Halldin, Maria; Sylvén, Sara; Skalkidou, Alkistis; Papadopoulos, Fotios C;	2023	Incidence of idiopathic intracranial hypertension in individuals with gonadotropin-releasing hormone analogue treatment for gender dysphoria in Sweden	JAMA pediatrics	177	7	726-727	Sweden	Cross-sectional or Obervational Cohort	Retrospective register-based cohort	Total = 4 230 individuals with gender dysphoria; 410 (9.7 %) treated with GnRHa. Of these, 219 (53 %) were under 18 at treatment start (mean 15.5 ± 1.6 yrs). Matched comparators = 73 096 from general population. Follow-up median 1.4 yrs (range 0–10.1). Attrition minimal via national registry linkage.	Registry Cohort	Individuals with diagnosis of gender dysphoria identified from the Swedish National Patient Register; linked to Prescribed Drug Register for GnRHa exposure and to National Diabetes and Population registers for covariates. Matched comparators (10 per case) drawn by sex assigned at birth, age, and region.	Puberty Blockers	“Exposure to gonadotropin-releasing hormone analogs (GnRHa) prescribed for gender dysphoria.”	checked	(1) Individuals with gender dysphoria not treated with GnRHa (n = 3 820); (2) general population comparators (n = 73 096) matched on age, sex assigned at birth, and region.	Physical health,Adverse Events	≥1yr follow-up	≥ 1 year follow-up (median 1.4 yrs; range 0–10.1). 16. Details of outcome assessment: Idiopathic intracranial hypertension diagnoses ascertained from hospital and outpatient records (ICD-10 code G93.2). Time-to-event analyses using Cox proportional-hazards models adjusted for sex assigned at birth, age, calendar year, and psychiatric comorbidity.			IIH cases: 1 event in GnRHa-treated group (incidence 4.4 per 100 000 person-years). No events in untreated gender dysphoria or general population comparators. Hazard ratio not estimable because only one case occurred. Sensitivity analyses including individuals with GnRHa for precocious puberty (n ≈ 6 000) found similar low rates (2 events; 3.3 per 100 000 PY).		Supported by the Swedish Research Council (grant 2021-01492) and the Swedish State under the agreement between the Swedish Government and the County Councils (the ALF agreement, grants ALF 20190364 and ALF 20200740).	Full declaration	Dr Karamanis reported receiving grants from the Swedish Research Council and ALF agreement during the conduct of the study. Dr Tornese reported receiving speaking fees from Ferring Pharmaceuticals and Ipsen Pharma outside the submitted work. No other disclosures were reported.	National registry design minimises attrition bias but rare event limits precision. Confirms no signal of increased IIH risk after GnRHa in gender dysphoria cohort. 25. Summary: Swedish national registry study (4 230 with GD; 410 treated with GnRHa, 219 <18). Only one case of idiopathic intracranial hypertension identified after GnRHa exposure; none in comparators. Incidence ≈ 4 per 100 000 person…	1
10.1089/lgbt.2021.0258	Psychosocial	Kennedy, Katrina S. and Harper, Christopher R. and Jingjing, Li and Suarez, Nicolas A. and Johns, Michelle M.	2022	Protective Environments, Health, and Substance Use Among Transgender and Gender Expansive Youth	LGBT Health	9	6	393-400	USA	Cross-sectional or Obervational Cohort	Cross‑sectional mixed‑methods online survey.	N = 1,396 transgender and gender diverse youth, ages 13–24, drawn from the 2018 web-based Survey of Today’s Adolescent Relationships and Transitions (START). Subsample: 13–17-year-olds = 436 (31%), 18–24 = 960 (69%). Gender identities included transgender male, transgender female, nonbinary AMAB, nonbinary AFAB, and genderqueer.	Internet,Community or Convenience Sample	START survey recruited US TGE youth via social media advertising (Facebook, Instagram, Twitter) and outreach through LGBTQ organizations. Eligibility: ages 13–24, living in US, identifying as TGE.	Family (Lack of) Support / Family therapy	Protective environments assessed included: perceived community tolerance of transgender people, family support (adapted Multidimensional Scale of Perceived Social Support), and housing stability (secure vs insecure).			Mental Health (individual),Psychosocial functioning (relational),Other	Baseline/Cross sectional	Outcome types: Mental health (individual proxy); Psychosocial functioning (relational); Substance use and self-rated health Detail of outcome assessment (include tools): Family support: 4-item adapted MSPSS (α = 0.94) Community tolerance: 4-item adapted Perceived Community Tolerance Scale (α = 0.87) Housing stability: single item Outcomes: • Self-rated health (5-point scale, collapsed to fair/poo…			Family support: Associated with lower odds of poor self-rated health (AOR=0.54, CI 0.39–0.74) and high-risk substance use (AOR=0.54, CI 0.36–0.81) across age groups. Among 13–17-year-olds specifically, family support also reduced odds of binge drinking (AOR=0.34, CI 0.15–0.77). Community tolerance: Associated with lower odds of poor self-rated health (AOR=0.70, CI 0.50–0.98). Housing stability: A…		“This work was supported by the National Institute on Drug Abuse (R01DA045704) and by the Eunice Kennedy Shriver National Institute of Child Health and Human Development (R03HD103724).”	"No conflicts" declaration		Summary Cross-sectional survey of 1,396 transgender and gender diverse youth (ages 13–24; 436 aged 13–17). Family support, community tolerance, and stable housing were all associated with better self-rated health, and family support specifically reduced odds of binge drinking and high-risk substance use among adolescents. Relevance for Guidelines Family involvement: Supports guideline recommendat…	0
10.1080/09589236.2025.2521699	Policy/Legal	Kennedy, Natacha	2025	Harming children: the effects of the UK puberty blocker ban	Journal of Gender Studies			1–17	UK	Qualitative	Cross-sectional mixed‑methods online survey	Questionnaire (narrative / qual content): 97 responses from parents of trans and non-binary children (age range of children not detailed in parent survey). Interviews: 7 young trans and non-binary people, aged 13–17, UK-based.	Community or Convenience Sample,Internet	Parents of trans/non-binary children affected by or spared from the UK puberty blocker ban. Youth aged 13–17, recruited through parents. Some youth had legally obtained puberty blockers abroad via private EU providers, creating variation in exposure.	Policy/legal,Puberty Blockers	Exposure = UK-wide ban on puberty blockers for minors, with analysis of consequences for trans youth and their parents.			Mental Health (individual),Psychosocial functioning (relational),Gender dyphoria/body satisfaction/body image,Adverse Events	<1yr follow-up	Questionnaire (free-text, details not specified). Semi-structured interviews with 7 youth (quotes included extensively).		checked	None reported; questionnaire data analysed qualitatively to thematic saturation (N=97).	Mental health (individual): Severe and rapid deterioration in wellbeing following the ban. Suicidal ideation and repeated self-harm reported. Persistent and overwhelming anxiety, stress, fear of the future, and trauma. Withdrawal, introversion, and reduced ability to engage in everyday life. In contrast, youth with access to blockers reported relief, reduced suicidality, improved mood, and school…	None reported	"No conflicts" declaration	No potential conflict of interest was reported by the author	Summary This study documents the lived experiences of UK trans and non-binary youth facing a national puberty blocker ban. Mixed-methods design with 97 parent survey responses and 7 youth interviews (ages 13–17). Findings show severe deterioration in mental health and wellbeing among those denied care, including suicidality, self-harm, withdrawal, school avoidance, and fear of unwanted pubertal c…	0
10.1089/lgbt.2021.0383	Psychosocial	Kirchner, Stefanie; Till, Benedikt; Plöderl, Martin; Niederkrotenthaler, Thomas;	2022	Effects of “It Gets Better” Suicide Prevention Videos on Youth Identifying as Lesbian, Gay, Bisexual, Transgender, Queer, or Other Sexual or Gender Minorities: A Randomized Controlled Trial	LGBT health	9	6	436-446	Germany, Austria	Controlled Intervention	Randomized Controlled Trial	N = 483 LGBTQ+ participants (242 intervention, 241 control). Mean age ≈ 19 y. Gender: ≈ 20 % non-binary/transgender (n = 100). All identified as sexual or gender minority youth residing in Austria/Germany. 61 % completed follow-up.	Community or Convenience Sample,Internet	German-speaking LGBTQ+ youth (14–22 yrs) recruited Jan–Nov 2020 through Austrian and German LGBTQ+ organisations, social-media pages (Facebook, Reddit, Tumblr, Instagram influencer post), and Romeo dating app. Ethics approval Medical University of Vienna (1013/2019); parental consent for minors on-site.	Peer group therapy or psychosocial ,Telehealth	“It Gets Better Project (IGBP) videos featuring LGBTQ+ individuals sharing personal stories of overcoming coming-out-related difficulties were shown to participants randomized to the intervention group; controls viewed neutral lifestyle videos on healthy eating and exercise.”	checked	Control group viewed matched-length non-LGBTQ+ videos about healthy lifestyle.	Mental Health (individual),Psychosocial functioning (relational)	Baseline/Cross sectional,<1yr follow-up	• Primary outcome: Suicidal ideation measured using Reasons for Living Inventory-Adolescents (32 items; reverse-coded; higher = greater ideation). • Secondary: Help-Seeking Questionnaire (personal/professional sources); LGB Identity Scale (identity challenges/internalised homonegativity); Mood subscale (Affective State Scale); Beck Hopelessness Scale (short version). Data collected at T1 (baselin…	checked		• Primary: Non-binary / transgender youth (n = 100) showed a small, significant short-term reduction in suicidal ideation after viewing IGBP videos vs controls at T2 (mean difference = -0.42 [95 % CI -0.79 to -0.06], p = 0.02, d ≈ 0.10). Effect driven by “future optimism” subscale and not maintained at 4-week follow-up. • Mediation: Greater identification with the video protagonist predicted lowe…		Austrian Science Fund (FWF, Project P30918-B27; PI: Thomas Niederkrotenthaler).	"No conflicts" declaration	No competing financial interests exist.”	Limitations: Small TGD subsample; short-term follow-up; videos featured cisgender narrators only; self-selected sample; loss to follow-up (38 %). Summary: A double-blind RCT with 483 LGBTQ+ youth (14–22 yrs) found no overall effect on suicidal ideation, but non-binary / transgender participants showed a small short-term improvement and greater help-seeking intentions. Benefits were mediated by id…	1
10.1080/14647273.2021.2015804	Fertility	Komorowski, Allison S; Fisher, Andrew R; Jungheim, Emily S; Lewis, Christopher S; Omurtag, Kenan R;	2023	Fertility preservation discussions, referral and follow-up in male-to-female and female-to-male adolescent transgender patients	Human fertility (Cambridge, England)	26	5	903-907	USA	Cross-sectional or Obervational Cohort	Retrospective chart review	N = 67 (22 male-to-female [Mtf]; 45 female-to-male [Ftm]) aged 12–17 years (median 15). Most had socially transitioned at home/school (82 % Mtf; 100 % Ftm). Forty-four (65.7 %) had mental-health diagnoses (mainly depression/anxiety). Attrition = not applicable (single-time retrospective extraction).	Other clinic,Record Review	Identified via ICD-9/10 codes for gender dysphoria from electronic medical records of a single academic paediatric endocrine service (Washington University St Louis, 2012–2017). Informed-consent waiver approved due to retrospective design.	Fertility related	“Counselling on the potential fertility impact of gender-affirming therapy, offers of fertility-preservation (FP) consultation, and subsequent pursuit of FP consultation or gamete cryopreservation among MtF and FtM adolescents.	checked	MtF vs FtM subgroups Analyses compared MtF (n = 22) and FtM (n = 45) for FP counselling, referral, and utilisation rates.	Tx trajectory/Persistance/Desistance/Satisfaction/Regret	Baseline/Cross sectional	Chart-extracted documentation of FP counselling, referral to reproductive endocrinology/infertility (REI), FP follow-up, and gamete cryopreservation. Comparisons used χ² or Fisher’s exact tests (p < 0.05).			Documented fertility counselling in 55 % of patients; 45 % no documentation. Among counselled, 73 % counselled before any medication. No significant MtF vs FtM difference in timing (p = 0.60). Offer of REI consultation to 49 % overall; follow-up in 7.5 %. Gamete cryopreservation in 2 MtF (9 %) and 0 FtM (0 %). 77 % with documented reproductive wishes reported no desire for biological children or …		Not reported	"No conflicts" declaration		Single-institution retrospective review; low documentation of FP counselling may reflect both practice and record-keeping limitations. Duration in care prior to documentation was not specified; outcomes represent chart events rather than longitudinal follow-up. Highlights gaps in implementation of WPATH and Endocrine Society guidelines on fertility counselling before puberty suppression or hormon…	1
10.1530/EC-25-0292	Puberty Pausers Only	Lahaije, Fleur A. H. and van Setten, Petra A. and Levels, Willemien and Becking-Malpasso, Karlijn and Claahsen-van der Grinten, Hedi L.	2025	GnRH analogues as a monotherapy in transgender and gender diverse adolescents: clinical insights from a single center study	Endocrine connections	14	8	e250292	Netherlands	Cross-sectional or Obervational Cohort	Retrospective cohort study	N = 100 (67 AFAB, 33 AMAB). Mean age at treatment start: 12.7 yrs (AFAB), 13.0 yrs (AMAB). 45 at Tanner 2/3, 49 at Tanner 4/5.	Specialist gender clinic	All transgender and gender-diverse adolescents who started GnRHa monotherapy at Radboudumc Expert Center for Sex & Gender (Netherlands) between 2010 and 2020. Inclusion: those who received GnRHa alone (no concurrent GAHT) for ≥6 months. Exclusion: adolescents who had received GAHT in addition to GnRHa, or those with <6 months of follow-up. Data obtained retrospectively from patient charts.	Puberty Blockers	Puberty suppression: GnRHa (Pamorelin® 11.25mg IM every 10–12 weeks). Monotherapy only (no GAHT during study period).	checked	Internal comparator: early puberty (Tanner 2/3) vs late puberty (Tanner 4/5).	Physical health,Adverse Events	<1yr follow-up,≥1yr follow-up	Tanner staging (clinician at baseline, self-reported later). Hormone assays (estradiol, testosterone, LH, FSH). Biometry: weight, height, BP, BMI. Self-reported side effects at every visit. (Follow-up: every 3 months - biometry, biochemistry, side effects).			GnRHa suppressed sex steroid hormones effectively in both AFAB and AMAB. Incomplete gonadotropin suppression, especially in Tanner 4/5 group. Limited clinical benefit in late puberty (Tanner 4/5): no reversal of breast tissue in AFAB; limited impact on male body hair. Side effects common, especially in late puberty: Hot flushes, abdominal complaints, and emotional problems (including sadness, moo…		This work was conducted without any financial support from external funding bodies, public or private	"No conflicts" declaration		Summary: This single-center study shows that GnRHa monotherapy effectively suppresses sex steroid hormones in adolescents but has limited benefit if started in late puberty (Tanner 4/5). Clinical changes were minimal at later stages, while side effects were frequent and persistent - especially hot flushes and mood disturbances. Pubertal development was successfully paused in early puberty (Tanner…	0
10.1089/trgh.2020.0103	GAHT Only	Laurenzano, Sarah E and Newfield, Ron S and Lee, Euyhyun and Marinkovic, Maja	2021	Subcutaneous Testosterone Is Effective and Safe as Gender-Affirming Hormone Therapy in Transmasculine and Gender-Diverse Adolescents and Young Adults: A Single Center's 8-Year Experience.	Transgender health	6	6	343-352	USA	Cross-sectional or Obervational Cohort	Retrospective chart review	N=119 TM/GD adolescents/young adults initiating SC-T. Age at presentation: mean 16.0 (range 10.1–19.8); age at SC-T start: mean 16.5 (range 13–19.9). Mean follow-up 1.9 yrs (range 0.5–5.5). Attrition: four lost to follow-up or early discontinuation; three stopped due to identity reconsideration or injection intolerance. Gender identity: predominantly transmale/male (92.5%); some non-binary/other …	Specialist gender clinic,Record Review	Retrospective chart review of all transmasculine and gender-diverse youth who initiated subcutaneous testosterone (SC-T) at Rady Children’s Hospital, San Diego (2012–2020). IRB-approved. Inclusion: started SC-T at ages 13–19 and received ≥6 months of treatment. Exclusion: <6 months therapy or incomplete records.	GAH (Hormones)	Subcutaneous testosterone (cypionate or enanthate) given weekly or biweekly; typical start 25–50 mg biweekly with dose escalation; at last follow-up >96% on 100–320 mg monthly (divided weekly/biweekly). Timing of blood draws differed by provider (mid-dose vs trough).		None (within-cohort pre/post and dose-group comparisons only).	Physical health,Adverse Events,Other	≥1yr follow-up	Serum testosterone (LC–MS/MS or ECLIA assays) Estradiol, AST, ALT, lipids, hematocrit BMI z-scores (CDC standards) Menstrual suppression data (time to amenorrhea, dose at cessation) Adverse events: acne, injection site reactions, hypertension, dyslipidaemia, hematocrit > 50% Statistical tests: t-tests, ANOVA, χ²			Dosing/levels: Most (79%) on 100–200 mg/month; additional 18% on 240–320 mg/month; 70% on weekly injections at final dose. Mean total/free T at 200 mg/month ≈ 460 ng/dL / 92 pg/mL; total/free T increased with dose (p=0.003 / p<0.001). Amenorrhoea: 54% ceased menses by 140 mg/month; 97% by 200 mg/month. Mean time to cessation 4.7 ± 3.0 months (5.4 mo if starting 50 mg/month vs 3.9 mo if 100 mg/mon…		“No funding was received for this article.”	"No conflicts" declaration	No competing financial interests exist for any author of this article.	Summary Retrospective longitudinal cohort (USA) of 119 TM/GD adolescents initiating subcutaneous testosterone. Over ≈2 years median follow-up, SC-T effectively achieved target testosterone ranges and amenorrhoea (≈97% by 200 mg/month), with low rates of serious adverse effects. Expected HDL decrease and haematocrit rise observed but generally remained within acceptable ranges. Relevance for Guide…	4
10.1089/lgbt.2022.0201	PB+ GAHT	Lavender, Rosemary and Shaw, Selina and Maninger, Johanna-Katharina and Butler, Gary and Carruthers, Paul and Carmichael, Polly and Masic, Una	2023	Impact of Hormone Treatment on Psychosocial Functioning in Gender-Diverse Young People.	LGBT health	10	5	382-390	UK	Cross-sectional or Obervational Cohort	Retrospective cohort using medical record review	N=38 (28 AFAB, 10 AMAB). Mean age 13.47 (range 10.42–14.51) at first endocrine clinic; mean 14.01 at GnRHa start (range 11.49–14.81); mean 16.10 at GAH start (range 15.62–17.12). From 109 eligible, 38 had complete data at all timepoints.	Specialist gender clinic,Record Review	Referred from the Gender Identity Development Service (GIDS) to endocrinology clinic at Tavistock and Portman NHS Foundation Trust between 2014–2018. Inclusion: age <15 at referral, Tanner stage 2+, completed questionnaires at three points (baseline, ~1 year on GnRHa, ~1 year on GAH).	Puberty Blockers,GAH (Hormones)	GnRHa (puberty blockers); Gender-affirming hormones (estrogen, testosterone).			Gender dyphoria/body satisfaction/body image,Mental Health (individual),Psychosocial functioning (relational)	≥1yr follow-up	Youth Self Report (YSR); Child Behavior Checklist (CBCL); Body Image Scale (BIS); Utrecht Gender Dysphoria Scale (UGDS); Social Responsiveness Scale-2 (SRS-2). Timepoints: baseline, ~1 year after GnRHa, ~1 year after GAH.			Significant reduction in dissatisfaction with primary sexual characteristics between baseline and 1 year post-GAH (p=0.02). Significant reduction in UGDS scores (gender dysphoria) over time, notably baseline vs. post-GAH (p=0.01). Significant reduction in caregiver-reported CBCL internalising behaviours after 1 year on GnRHa (p=0.03). SRS-2: Significant increase in social motivation between basel…		No funding was received for this article.	"No conflicts" declaration		Summary Observational cohort study in the UK of 38 gender-diverse adolescents (<15 at start, Tanner stage 2+) who began puberty suppression and later progressed to GAHT. Outcomes were measured at baseline, ~1 year on GnRHa, and ~1 year on GAH. Results showed that some psychosocial improvements began after GnRHa (notably caregiver-reported internalising problems), but the clearest benefits in gend…	5
10.1089/lgbt.2022.0334	Policy/Legal,Surgery Plus	Lee MK, Yih Y, Willis DR, Fogel JM, Fortenberry JD	2024	The Impact of Gender Affirming Medical Care During Adolescence on Adult Health Outcomes Among Transgender and Gender Diverse Individuals in the United States: The Role of State-Level Policy Stigma.	LGBT Health	11	2	111-121	USA	Cross-sectional or Obervational Cohort	Secondary analysis of the USTS cross-sectional survey comparing adults with versus without adolescent GAMC exposure using retrospective recall	USTS 2015 adult respondents; analytic cohorts constructed per exposure type (puberty blockers; hormone therapy; surgical transition) with controls = no adolescent GAMC. Flow diagram shows exclusions: outside 50 states, ≥55 years, identified as TGD after 18; exposures required start <19 and ≥2 years before survey. (Exact cohort Ns provided per model in Table 1 / Fig. 2.)	Internet,Community or Convenience Sample	Secondary analysis of the 2015 U.S. Transgender Survey (27,715 adults) conducted online across all 50 states in collaboration with 400+ community organizations; current study excluded territories, age ≥55, and those identifying as TGD after 18. Exposure cohorts limited to first GAMC <19 and ≥2 years pre-survey; state policy tallies linked from MAP at survey start.	Policy/legal,Puberty Blockers,GAH (Hormones),"Surgery (top, bottom, or other)",GAHC general or unspecified	“The cohort for each model was determined by their desire to receive GAMC… The exposure group … included participants who accessed [puberty blockers / hormone therapy / surgical transition] during adolescence, determined by survey items on ever-use and age at initiation.”	checked	For each model, respondents who did not undergo any adolescent GAMC served as controls; analyses adjusted via propensity score matching, with exact matching on state policy category.	Mental Health (individual),Physical health,Adverse Events	≥1yr follow-up	Timing note (retrospective single time-point): Outcomes measured in adulthood at a single survey wave; exposure required ≥2 years since first adolescent treatment. Outcomes: past-month severe psychological distress (Kessler-6 ≥13), past-year suicidal ideation, general health (1–5), past-year health care avoidance due to possible mistreatment. Moderator: state-level transgender policy tally (unsup…			Severe psychological distress: Lower odds with adolescent exposure to PB (AOR 0.22, 95% CI 0.06–0.80), HT (0.72, 0.54–0.96), surgery (0.32, 0.17–0.61). Health care avoidance: Higher odds overall with adolescent exposure—HT (2.30, 1.23–4.28), surgery (3.42, 1.68–7.00); interaction: effect attenuated in supportive policy states (e.g., exposure×supportive 0.37 for HT; 0.22 for surgery). General heal…		“The author(s) received no financial support for the research, authorship, and/or publication of this article.”	"No conflicts" declaration	“The authors have no conflicts of interest to disclose.”	Notes: Adult cross-sectional outcomes assessed ≥2 years after adolescent treatment; single time-point limits causal inference. Policy moderation suggests contextual effects on access/avoidance. Summary: US secondary analysis of USTS 2015 linking adolescent GAMC exposure (PB/HT/surgery <19, ≥2 yrs prior) to adult outcomes with state policy moderation. Adolescent GAMC associated with lower severe p…	1
10.1177/14407833251314008	Psychosocial	Lim, Gene and Buckingham, Philippa and McGowan, Ivy and Grant, Ruby and Amos, Natalie and Anderson, Joel and Bourne, Adam	2025	Exploring trans youths’ future orientations as a product of experiences of dis/affirmation	Journal of Sociology	61	3	547-568	Australia	Qualitative	Qualitative thematic analysis of open‑ended survey responses.	Total sample (mixed age): n = 1,679 trans youth aged 14–21 Adolescent subsample: n = 945 aged 14–17 (55.7% of total) Demographics: Gender identities: Trans men (23.9%), trans women (4.4%), non-binary youth (71.7%) Ethnic diversity: Majority Anglo-Celtic (63.5%), with Aboriginal/Torres Strait Islander (4.6%) and other minority groups represented Disability: 56.3% reported a disability Education: M…	Community or Convenience Sample,Internet	Target group: Transgender and gender diverse youth (survey of ages 14–21) Context: Drawn from Writing Themselves In 4, a large national survey of LGBTQA+ young people in Australia Relevance: Includes adolescents under 18 (focus of this review) alongside young adults; data were disaggregated by age group, with specific responses from adolescents (14–17)	Family (Lack of) Support / Family therapy,School experiences,Policy/legal	Not a formal intervention. Exposure is experiences of affirmation vs. dis-affirmation across family, school, and healthcare contexts			Mental Health (individual),Psychosocial functioning (relational)	Baseline/Cross sectional	Semi-structured interviews, one-off (60–90 min each) Reflexive thematic analysis (Braun & Clarke)		checked		Experiences of affirmation (supportive families, inclusive schools, affirming healthcare) linked to hopeful and expansive future orientations (e.g., imagining careers, relationships, long-term stability). Experiences of dis-affirmation (misgendering, school exclusion, family rejection, barriers in healthcare) led to constricted or uncertain future orientations — some youth struggled to envision a…	“This research was supported by the Australian Research Council (ARC) Discovery Project DP210101978.”	"No conflicts" declaration		Summary Large mixed-age qualitative survey study, Australia; n = 1,679 trans youth (14–21), of whom 945 were adolescents (14–17). Open-ended responses examined links between experiences of affirmation/dis-affirmation and imagined futures. Affirming experiences (supportive families, inclusive schools, access to care) were associated with expansive and hopeful future orientations, while dis-affirma…	0
10.1177/0004867420976846	Psychosocial	Lucassen, Mathijs Fg; Stasiak, Karolina; Fleming, Theresa; Frampton, Christopher; Perry, Yael; Shepherd, Matthew; Merry, Sally N;	2021	Computerized cognitive behavioural therapy for gender minority adolescents: Analysis of the real-world implementation of SPARX in New Zealand	The Australian and New Zealand journal of psychiatry	55	9	874-882	Aoteroa/New Zealand	Cross-sectional or Obervational Cohort	Secondary quantitative analysis of open implementation cohort	N = 9079 registrants (2.3 % transgender n = 207; 65.7 % female n = 5968; 32 % male n = 2904). Age 12–19 (≈ 63 % aged 12–15). Ethnicity ≈ two-thirds NZ European, 15 % Māori. Attrition high ( < 10 % completed Module 4; ≈ 3 % completed Module 7 ).	Internet	Users self-registered at www.sparx.org.nz after national launch (Apr 2014); promoted via social media, schools, health providers and Ministry of Health websites. Eligible = 12–19 years, selected gender (male, female, transgender). No direct researcher contact.	Individual Therapy/Counseling,Telehealth	Use of SPARX, a computerized CBT self-help program for adolescents with depressive symptoms, delivered nationwide via web platform.	checked	transgender vs male vs female users; Between-group comparisons of baseline depressive symptoms and program completion rates.	Mental Health (individual),Psychosocial functioning (relational)	<1yr follow-up	(use period 2014–2019; baseline–module 4–module 7 intervals ≈ several weeks). 16. Details of outcome assessment: Patient Health Questionnaire – Adolescent (PHQ-A) integrated in Modules 1 (baseline), 4 (mid-point), and 7 (post-intervention). Depression severity categorised (0–4 none; 5–9 mild; 10–14 moderate; 15–19 moderately severe; 20–27 severe). Analyses via ANOVA and χ².			Transgender registrants = 2.3 % of users (≈ double population proportion). Baseline “high mental health needs”: transgender 69 %, male 37 %, female 56 % (χ²(2)=289.8, p < 0.001). Mean PHQ-A: trans 16.7 ± 8.2, male 11.1 ± 7.8, female 14.7 ± 7.2 (F ≈ 38.7, p < 0.001). Module completion rates (≥ Module 4): trans 5.8 %, male 7.6 %, female 9.6 (p = 0.005). Depression change (baseline→final): trans –0.…		None	Full declaration	The intellectual property for SPARX is held by UniServices at the University of Auckland. Any proceeds from licensing or selling SPARX outside of New Zealand will be shared in part with UniServices and ML, KS, TF, MS and SM.	National open-access e-therapy; transgender youth had highest baseline depression and poorest engagement. Low completion likely related to binary avatars and lack of representation of gender-diverse users. Probable but undertermined misclassificaiton on binary transgender youth. Summary: Five-year national usage analysis of SPARX CBT program (9079 youth, 207 transgender). Transgender adolescents …	2
10.1037/sgd0000544	Psychosocial	Mackie, Grace and Patlamazoglou, Lefteris and Lambert, Karen	2023	The Experiences of Australian Transgender Young People in School Counseling: An Interpretative Phenomenological Analysis	Psychology of sexual orientation and gender diversity	10	2	337-349	Australia	Qualitative	Cross-sectional Interpretative Phenomenological Analysis (IPA)	N = 11 transgender young people, aged 12–17 years (M = 15.8, SD = 1.6). Attending Australian secondary schools (6 government, 4 Catholic/independent, 1 First Nations student). All accessed individual school counselling for general or gender-related issues. No attrition reported.	Internet,Community or Convenience Sample	Purposive sampling via digital flyers distributed on Facebook and Reddit transgender youth groups and through two Australian LGBTQ+ youth organisations. Interested participants contacted the researchers directly, received information and consent forms, and participated via Zoom video interview.	School experiences,Individual Therapy/Counseling	“Participants were accessing individual school counselling sessions for general psychological issues and/or specific gender-related issues with school psychologists and counsellors in the secondary school environment.”			Psychosocial functioning (relational),Mental Health (individual),Global functioning/QoL	Baseline/Cross sectional	Single semistructured Zoom interviews (60–90 min) conducted by the first author. Audio-recorded and transcribed verbatim; participants reviewed transcripts for accuracy. Data analysed using Interpretative Phenomenological Analysis across three phases with investigator triangulation and reflexive journaling. Themes derived inductively.		checked		Four superordinate themes captured how transgender youth experienced and evaluated school counselling: 1️⃣ The Transgender Young Person – identity exploration, coming out, expectations of counselling, self-acceptance, and empowerment through skills and knowledge gained. 2️⃣ The Therapeutic Relationship – importance of counsellor warmth, affirmation, use of correct names/pronouns, advocacy, and co…	None	"No conflicts" declaration	“The authors declare this article is an original piece of work that has not been submitted to nor published anywhere else. No funding was granted for the current study and there are no conflicts of interest.”	Limitations: Small sample (11), self-selected via online recruitment; may over-represent participants with positive counselling experiences. Findings not generalizable. Summary: Australian IPA study (ages 12–17) found that affirming, knowledgeable, and supportive school counsellors fostered trust and well-being. Safe spaces and LGBTQ+ inclusive school environments enhanced mental health and belon…	1
10.1016/j.jadohealth.2024.05.015	Surgery Plus,GAHT Only	MacKinnon, Kinnon R. and Jeyabalan, Thiyaana and Strang, John F. and Delgado-Ron, Jorge Andrés and Lam, June S.H. and Gould, Wren A. and Cooper, Alex and Salway, Travis	2024	Discontinuation of Gender-Affirming Medical Treatments: Prevalence and Associated Features in a Nonprobabilistic Sample of Transgender and Gender-Diverse Adolescents and Young Adults in Canada and the United States.	Journal of Adolescent Health	75	4	569-577	Canada, USA	Cross-sectional or Obervational Cohort	Cross-sectional online survey study with internal comparison of participants who discontinued versus continued gender-affirming medical treatment	N=3,937 respondents aged 15–29 (mean 21.1). Analytic sample: N=731 who had ever accessed GAMT. 720 answered discontinuation question. Of 720: 121 (16.8%) reported discontinuation; 45/121 (37.2%) “Yes, but I wish I hadn’t.” Demographics: 80.8% AFAB; 54.2% nonbinary; 28.9% trans men; 8.1% trans women; 0.7% detransitioner. Race: 77.9% White, 1.8% Black, 1.9% Asian, 1.8% Hispanic, 0.7% Two-Spirit, 1.…	Internet	Online survey (Understanding Affirming Communities, Relationships, and Networks – UnACoRN), conducted Mar–Aug 2022. Recruitment via paid ads (Meta, Pornhub, bus ads) and unpaid outreach (Reddit, TikTok, other social media, word-of-mouth). Some ads specifically targeted detransition networks (~3% of participants recruited this way).	Treatment trajectory/Discontinution/Detrans,Puberty Blockers,GAH (Hormones),"Surgery (top, bottom, or other)",GAHC general or unspecified	“Which of the following gender-affirming medical procedures or treatments have you ever accessed, if any?: puberty blockers, hormonal treatments (e.g., testosterone, estrogen, spironolactone), electrolysis, breast implants, chest masculinization, facial feminization or masculinization surgeries, or something else.”	checked	Logistic regression comparing sociodemographic and psychosocial correlates of discontinuation vs continuation.	Adverse Events,Mental Health (individual),Other,Tx trajectory/Persistance/Desistance/Satisfaction/Regret	Unclear	Primary outcome: self-reported discontinuation/reversal of GAMT (“yes”; “yes, but I wish I hadn’t”; “no”; “no, but I would like to”). Reasons: checklist + open-text (health, identity change, cost, availability, fertility, pressure, side effects, etc.). Correlates: age, gender, sexual orientation, mental health diagnoses, neurodivergence, religiosity, income, country, support. Analyses: univariate…			Discontinuation: 16.8% (121/720). Sensitivity analysis excluding GnRHa-only → 16.4%. Reasons: health (37%), change in gender identity (32%), cost (16%), lack of availability (12%), fertility (5%), pressure from providers/partners/friends (<7%). Open-text: satisfaction, side effects, mental health, temporary stop. Correlates ↑ discontinuation: older age (OR 1.07 per year), nonbinary identity (OR 1…	From open-text: satisfaction after achieving goals, mental health challenges, lack of support, dissatisfaction with changes, temporary pauses, side effects.	“This study was funded by the Social Sciences and Humanities Research Council.”	"No conflicts" declaration	“The authors have no conflicts of interest to declare.”	Notes: Large binational community survey of discontinuation. Limitations: nonprobability sample, possible recruitment bias (esp. detransition networks), cross-sectional, skip logic error (excluded some from reasons question). Summary: Canadian/US cross-sectional survey (N=731 GAMT users, ages 15–29). 16.8% reported discontinuation; 37% of those regretted stopping. Most who discontinued still iden…	0
10.1016/j.jss.2023.05.019	Puberty Pausers Only	Mak, Allison and Hwang, Rosa and Nace, Gary and Allukian Iii, Myron and Nance, Michael L.	2023	Trends in Histrelin Implantation at a Pediatric Tertiary Care Center	Journal of Surgical Research	291		73-79	USA	Cross-sectional or Obervational Cohort	Retrospective cohort record review	746 pediatric patients (age 1.05–17.34 years) underwent histrelin implantation between 2008–2021. CPP (central precocious puberty): 579 patients, mean age 8.02 years. GD (gender dysphoria): 167 patients, mean age 12.34 years. GD patients represented 22% of cohort. Both groups <18 years at implantation.	Other clinic,Record Review	Patients identified through a single pediatric tertiary center’s electronic medical record. Indications for histrelin implant included CPP and GD. Most GD referrals came from the endocrine clinic (78%) or gender clinic (22%). All cases underwent implantation, replacement, or removal performed by pediatric surgeons in clinic, sedation unit, or operating room.	Puberty Blockers	Histrelin implant insertion/removal	checked	CPP vs GD patients; procedural setting differences (clinic, sedation unit, OR) NB comparison very limited and outcome not compared	Physical health,Adverse Events	<1yr follow-up	Procedural safety outcomes recorded via chart review.			GD implantations increased from 1 in 2008 to 77 in 2021 (32% of annual implantations). Mean age: CPP 8.02y vs GD 12.34y. Insurance: majority private (78.8%). GD patients more likely private insured. Setting: GD patients more often had procedures in clinic/sedation unit than OR. Complications: 14 of 1794 procedures (0.8%), including implant breakage, wound issues, skin irritation, 1 infection. No …		Allison Mak was supportedby the Agency forHealthcare Research and Quality National Research Service Award (T32), through grant number 5T32HS026116.	Full declaration	M.L.N. has participated on an advisory board for Endo Pharmaceuticals and as a paid consultant regardingprocedural issuesfortheimplant.M.L.N.wasnot involved with the decisions to use or discontinue this medication.	Notes: Authors highlight cost and insurance coverage as barriers; private insurance predominates among GD patients. Limitations: single-center, retrospective, lack of long-term psychosocial outcomes, no GD-specific complication analysis. Summary: US single-center retrospective study (n=746; 167 GD youth, mean age 12.3y) of histrelin implantations (2008–2021). GD implantations increased markedly o…	0
10.1089/trgh.2020.0111	PB+ GAHT	Marwa, Albara; Misra, Madhusmita; Lopez, Ximena;	2022	Determinants of bone mineral density in transgender youth	Transgender health	7	3	213-218	USA	Cross-sectional or Obervational Cohort	Retrospective cross-sectional study using medical record review	119 transgender adolescents (46 AMAB, 73 AFAB); ages 9–21 ( mean ≈ 15 ). Sub-sample n = 31 treatment-naïve at baseline. Follow-up range 0–180 days pre/post GnRHa or GAH start. ≈ 74 % advanced puberty (Tanner IV–V). Vitamin D deficiency ≈ 31 %. Attrition = 51 excluded for missing DXA data.	Specialist gender clinic,Record Review	Patients evaluated in the UT Southwestern Pediatric Gender Clinic (2014–2019). Charts identified for transgender youth who received DXA within 180 days before/after puberty suppression or GAH initiation. IRB approved; consent and assent obtained for prospective cohort participation.	Puberty Blockers,GAH (Hormones)	“Dual X-ray absorptiometry (DXA) performed before or within 180 days of starting puberty suppression and/or gender-affirming hormone therapy (estrogen or testosterone).”	checked	Yes – AMAB vs AFAB 14. Comparator group details: Differences in lumbar spine BMD Z-scores by sex assigned at birth (AMAB n = 46, AFAB n = 73).	Physical health	<1yr follow-up	Lumbar spine DXA ( Hologic/Lunar ), converted to Hologic standard; BMD Z-scores adjusted for height, race, and sex assigned at birth (using Zemel curves). Regression models tested age, race, BMI Z-score, vitamin D status, Tanner stage, insurance, and sex as predictors.			AMAB mean LS BMD Z = –0.61 ± 1.42; AFAB = 0.04 ± 1.09 (p = 0.010). Difference greater when using affirmed gender database (AMAB –1.75 ± 1.62; AFAB 1.05 ± 1.06; p < 0.001). Multivariate model (R² = 0.206): AMAB gender β = –0.42 (p = 0.061); vitamin D deficiency β = –0.55 (p = 0.022); BMI Z β = 0.36 (p < 0.001). No effect of age, race, ethnicity, insurance, or Tanner stage.		Partly supported by NIH National Institute of Child Health and Human Development grant K24HD071843 (Misra M).	"No conflicts" declaration		Notes: Outcomes measured before/within 180 days of GnRHa or GAH start; represents early treatment period. BMI and vitamin D deficiency identified as modifiable determinants of low BMD. Physical activity not assessed. 25. Summary: Retrospective US study (119 youth ages 9–21) evaluating lumbar spine BMD before or soon after GnRHa/GAH start. AMAB youth had lower BMD Z-scores than AFAB; low BMI and v…	1
10.1007/s00431-021-04075-2	PB+ GAHT,GAHT Only	McCallion, Stephanie and Smith, Simon and Kyle, Heather and Shaikh, M Guftar and Wilkinson, Gordon and Kyriakou, Andreas	2021	An appraisal of current service delivery and future models of care for young people with gender dysphoria.	European journal of pediatrics	180	9	2969-2976	United Kingdom (Glasgow, Scotland)	Cross-sectional or Obervational Cohort	Retrospective clinical chart-review .	N = 91 adolescents with gender dysphoria referred for puberty suppression (2011–2019). Median age at initial endocrinology assessment: 14.6 years (range 8.8–17.6). 59 (65%) assigned female at birth, 32 (35%) assigned male at birth. Median follow-up: 1.9 years (range 0.1–5.9).	Specialist gender clinic	Youth diagnosed with GD, referred by mental health professionals to endocrinology for puberty suppression. Assessed for eligibility, comorbidities, fertility preservation, and initiation of GnRH analogue.	Treatment trajectory/Discontinution/Detrans,Puberty Blockers,GAH (Hormones),Fertility related,GAHC general or unspecified	Puberty suppression (GnRHa), followed by gender-affirming hormones in eligible cases; fertility counselling; fertility preservation.			Mental Health (individual),Psychosocial functioning (relational),Gender dyphoria/body satisfaction/body image,Adverse Events,Tx trajectory/Persistance/Desistance/Satisfaction/Regret	≥1yr follow-up,<1yr follow-up	Data extracted from medical records. Diagnoses of mental health disorders made by CAMHS clinicians. No standardised outcome measures or psychometric tools. Additional information on outcome timing: Median follow-up 1.9 years (range 0.1–5.9). GnRHa discontinued in 6 cases after 6–18 months, reflecting variable treatment duration across cohort.			Mental health (individual): 37% (n=34) had a diagnosed mental health disorder (depression, anxiety, eating disorder, borderline/emotionally unstable PD). 23% (n=21) had ASD; 4% (n=4) had ADHD. Mental health problems more common in AFAB adolescents (51%) compared to AMAB (13%, p<0.0001). Among those who discontinued GnRHa, most had significant comorbidities (4 with mental health disorders, 3 with …		No specific grant funding	"No conflicts" declaration		No regrets about treatment reported in this cohort; discontinuation due to desistence or non-compliance, not dissatisfaction with care.	3
10.1016/j.jadohealth.2023.10.028	Puberty Pausers Only	McGregor, Kerry and McKenna, John L and Williams, Coleen R and Barrera, Ellis P and Boskey, Elizabeth R	2024	Association of Pubertal Blockade at Tanner 2/3 With Psychosocial Benefits in Transgender and Gender Diverse Youth at Hormone Readiness Assessment.	The Journal of adolescent health : official publication of the Society for Adolescent Medicine	74	4	801-807	USA	Cross-sectional or Obervational Cohort	Retrospective cohort, case series, record review	N = 438 TGD youth (ages 13–17) assessed for hormone readiness, 2017–2021. 40 had received pubertal blockade at Tanner 2/3. 398 had not received blockade. Median age at PB initiation: 12 yrs. Mean time on blockade before hormone assessment: 17.8 months (SD 14.2).	Specialist gender clinic,Record Review	All youth presenting for hormone readiness evaluation (estrogen or testosterone) between 2017–2021. Data abstracted from standardized clinical assessments and chart review. Inclusion: aged 13–17, completed Youth Self Report (YSR). Exclusion: PB initiated at Tanner ≥4.	Puberty Blockers	Pubertal blockade with GnRHa, initiated at Tanner stage 2 or 3.	checked	Internal comparator: PB (Tanner 2/3) vs no PB (majority Tanner ≥4).	Mental Health (individual),Psychosocial functioning (relational)	Baseline/Cross sectional	Youth Self Report (YSR), validated measure (112 items, subscales + DSM-oriented). Dichotomized items on suicidality (“I think about killing myself”) and self-harm (“I deliberately try to hurt or kill myself”).			PB group had significantly lower YSR T-scores for: Internalizing problems (−7.0, p<.001). Anxiety problems (−4.3, p=.009). Depressive problems (−5.8, p<.001). Stress problems (−4.1, p=.013). Total problems (−4.5, p=.009). Suicidal ideation: PB 12.5% vs no PB 27.2% (OR=0.38, p=.05 univariate; attenuated to OR=0.44, p=.10 when restricted to 13–15 yr olds). Self-harm: no significant difference (PB 7…		None reported. (No funding acknowledgement section)	"No conflicts" declaration		Summary: This large US cohort study shows that transgender and gender diverse youth who accessed puberty blockers at Tanner stage 2/3 had better psychosocial outcomes at the time of hormone readiness assessment compared to peers who did not. Blocker recipients reported significantly lower levels of anxiety, depression, stress, and internalizing symptoms, as well as fewer total psychosocial proble…	2
10.1016/j.jadohealth.2024.04.006	Psychosocial	McGregor, Kerry and Rana, Vinisha and McKenna, John L. and Williams, Coleen R. and Vu, Ava and Boskey, Elizabeth R.	2024	Understanding Family Support for Transgender Youth: Impact of Support on Psychosocial Functioning	Journal of Adolescent Health	75	2	261-266	USA	Cross-sectional or Obervational Cohort	Retrospective observational study standardized self-report scales and chart review	n = 175 adolescents, ages 13–18 Gender identity: 55% male, 34% female, 11% nonbinary Sex assigned at birth: 62% female, 37% male, 1% intersex Living situation: 97% lived with ≥1 parent, 14% with ≥1 non-parent relative System involvement: 2% in family custody; 5% unknown	Specialist gender clinic	Target group: Transgender and gender diverse adolescents undergoing hormone readiness assessment Context: Participants completing behavioral health and hormone readiness assessments as part of standard care	Family (Lack of) Support / Family therapy	Exposure: Family support as measured by the Family Environment Scale (FES) — eight subscales capturing positive and negative aspects (e.g., open communication, acceptance, exclusion/abuse, moral rejection, efforts to change gender)		Internal comparisons across levels of family support (positive vs. negative subscales)	Mental Health (individual),Psychosocial functioning (relational)	Baseline/Cross sectional	Youth Self-Report (YSR): Emotional/behavioral functioning (T-scores for internalizing, externalizing, total problems; self-harm; suicidality; family relationships) Family Environment Scale (FES): Positive and negative family support subscales Gender Minority Stress & Resilience (GMSR): Internalized transphobia Transgender Congruence Scale (TCS): Gender identity acceptance			Negative support (exclusion/abuse, moral rejection, attempts to change gender) significantly associated with higher YSR scores (internalizing, externalizing, total problems), greater internalized transphobia, and increased suicidal ideation. Positive support (explicit care, acceptance, advocacy) associated with lower YSR externalizing and total problems, stronger identity acceptance, and less int…		“No funding was secured for this study"	"No conflicts" declaration		Summary Clinic-based cross-sectional study, USA; 175 TGD adolescents aged 13–18. Family support measured via the Family Environment Scale. Positive family support was associated with fewer behavioral health problems, less internalized transphobia, and greater identity acceptance. Negative family support predicted worse outcomes, including suicidality and poorer family relationships. Relevance for…	0
10.1080/0092623X.2023.2281986	Puberty Pausers Only	McPherson, Susan and Freedman, David E.P.	2024	Psychological Outcomes of 12–15-Year-Olds with Gender Dysphoria Receiving Pubertal Suppression in the UK: Assessing Reliable and Clinically Significant Change	Journal of sex & marital therapy	50	3	315-325	UK	Cross-sectional or Obervational Cohort	Secondary analysis of an uncontrolled prospective cohort	N = 44 adolescents (12–15 yrs; 55% assigned female at birth). Puberty suppression initiated with triptorelin. Follow-up CBCL parent-reports available at 12m (n=41), 24m (n=20), 36m (n=11); YSR self-reports at 12m (n=41), 24m (n=15). Attrition largely due to participants ageing out (>16 yrs).	Specialist gender clinic	Re-analysis of UK GIDS study (2011–2014). Participants aged 12–15 recruited after ≥6 months in GIDS, psychologically stable, meeting criteria for GD, actively requesting GnRHa. Referred to UCLH for treatment. Data collected at baseline and 12, 24, 36 months.	Puberty Blockers	Puberty suppression using triptorelin (GnRHa) for 12–15-year-olds with gender dysphoria; follow-up 36 months.		Child Behavior Checklist CBCL (parent-report) and Youth Self Report Form YSR completed at baseline, 12, 24, and 36 months after puberty suppression initiation. Scales included Internalizing, Externalizing, and Total Problems (T-scores standardised by age/sex). Reliable Change Index and Clinically Significant Change computed using Achenbach norms (cut-offs <60 normal, 60–63 borderline, >63 clinica…	Mental Health (individual),Psychosocial functioning (relational),Global functioning/QoL	≥1yr follow-up	Standardized mental health questionnaires completed at baseline and follow-up (12, 24, and for parents also 36 months): the Achenbach Child Behavior Checklist (parent report) and Youth Self-Report (self report), scored on Internalizing, Externalizing, and Total Problems scales, converted to age/sex-normed T-scores, and then analyzed for each participant using Reliable Change Index calculations an…			• Across CBCL and YSR subscales, 37–70% showed no reliable change. • 15–34% reliably deteriorated; 9–29% reliably improved. • Clinically significant improvement ranged 0–35% across subscales and time points, declining toward 0% by 36 months. • 27–58% were in the clinical/borderline range at baseline. • At 36 months, only 1 of 5 participants (20%) on CBCL Externalising moved to normal range.		None	"No conflicts" declaration	“No potential conflict of interest was reported by the authors.”	Secondary analysis of Carmichael et al. (2021) data from UK GIDS study. Small sample and attrition limit power. Authors argue that individual-level change analyses reveal heterogeneity often masked by group means. Rates of deterioration (15–34%) higher than typical CAMHS benchmarks. Summary: UK secondary analysis of 44 youth (12–15 yrs) on GnRHa triptorelin for up to 36 months. Majority showed no…	2
10.1542/peds.2020-013300	Surgery Only	Mehringer, Jamie E. and Harrison, Jacqueline B. and Quain, Kit M. and Shea, Judy A. and Hawkins, Linda A. and Dowshen, Nadia L.	2021	Experience of Chest Dysphoria and Masculinizing Chest Surgery in Transmasculine Youth.	Pediatrics	147	3	1-11	USA	Qualitative	Qualitative; MCS vs no MCS	N=30, ages 14–21 (mean 17.5). Non-MCS group: n=16 (no chest surgery). Post-MCS group: n=14 (10 under 18 at surgery; age at MCS 14–18; mean 16.4).	Specialist gender clinic	Recruited from the CHOP Gender and Sexuality Development Clinic. Eligibility: AFAB youth aged 13–21, identifying male or along masculine spectrum, experiencing chest dysphoria (SMR 4–5 or postmenarcheal). Excluded if surgery <90 days prior or if lead investigator was primary clinician. Purposeful sampling by age, race, ethnicity, insurance to ensure diversity. Recruitment in-person at clinic, by …	"Surgery (top, bottom, or other)"	“Experiences of chest dysphoria and thoughts about or experiences with masculinizing chest surgery in transmasculine youth”	checked	Youth who had undergone MCS vs those who had not.	Gender dyphoria/body satisfaction/body image,Mental Health (individual),Psychosocial functioning (relational),Tx trajectory/Persistance/Desistance/Satisfaction/Regret	<1yr follow-up,≥1yr follow-up	Semi-structured qualitative interviews (audio-recorded, transcribed, de-identified). Single interview, reflections included postop follow-up mean 19 months, range 6–48. Grounded theory coding in NVivo v12. Coding reliability: κ=0.92 median. Supplemented by demographic survey and brief EHR review.			Sample: mean age 17.5, 73% White, 87% privately insured, 83% on testosterone. Post-MCS youth (n=14): mean age at surgery 16.4; 71% self-pay due to insurance denial. Surgical techniques: 29% periareolar/keyhole, 71% DI/FNG or inverted-T.	Chest dysphoria causes strong negative emotions, including suicidality. Youth feel helpless and unable to escape dysphoria. Dysphoria intrinsic, not limited to social settings. Dysphoria causes functional impairment (school, work, hygiene, posture, social avoidance). Chest binding as trade-off: necessary but harmful. MCS viewed as critical to affirmation, but access barriers = cost, insurance den…	Supported by a grant from the Children’s Hospital of Philadelphia Center for Pediatric Clinical Excellence.	"No conflicts" declaration	“The authors have indicated they have no potential conflicts of interest to disclose.”	In-depth qualitative study of adolescent transmasculine chest dysphoria and MCS. Provides detailed evidence of psychosocial impacts and highlights systemic barriers (insurance denial for minors). Of 35 youth approached for recruitment, 30 youth enrolled and completed the study visit -- possible participation bias Summary: US qualitative study (N=30, ages 14–21; 14 post-MCS, 10 of them <18). Chest…	1
10.1089/trgh.2020.0007	Puberty Pausers Only	Mejia-Otero, Juan Diego and White, Perrin and Lopez, Ximena	2021	Effectiveness of Puberty Suppression with Gonadotropin-Releasing Hormone Agonists in Transgender Youth.	Transgender health	6	1	31-35	USA	Cross-sectional or Obervational Cohort	Retrospective comparative record review (TNG vs CPP)	Transgender youth: n=30 (AMAB 56.7%, AFAB 43.3%); mean age 13.0 ± 2.1 y; 56% Tanner IV–V at start (thus more patients at advanced Tanner stage) Central precocious puberty (CPP) comparator: n=30; mean age 7.7 ± 2.3 y; none Tanner IV–V.	Specialist gender clinic,Other clinic,Record Review	Inclusion: treated with GnRHa; baseline and follow-up (2–12 mo) LH, FSH, testosterone and/or estradiol measured. Exclusion: prior/concomitant progestins, OCPs, testosterone, estradiol, spironolactone; CAH.	Puberty Blockers	GnRHa: Histrelin (Supprelin or Vantas) implants or leuprolide depot injections. Trans group more often implants (66%); CPP more often leuprolide (63%).	checked	External comparator: children with central precocious puberty (CPP). Internal contrasts: type of GnRHa (histrelin vs leuprolide); AMAB vs AFAB analyses.	Physical health	<1yr follow-up	Unstimulated LH/FSH by immunoassay; total testosterone by IA or LC/MS; estradiol by LC/MS. Tanner staging by clinician; comparisons at baseline and follow-up.			Overall effectiveness: GnRHa suppressed LH/FSH and sex steroids in transgender youth similar to CPP, indicating adequate HPG-axis suppression. AMAB: Follow-up LH (0.6 vs 0.4 mIU/mL), FSH (0.5 vs 0.4), and testosterone (12.1 vs 6.4 ng/dL) were not different from CPP males (all NS). AFAB: Follow-up LH and FSH similar to CPP females; estradiol remained higher in trans AFAB (9.4 ± 9.7 vs 1.8 ± 1.8 pg…		No funding was received for this article	Full declaration	Dr. Lopez participated in an Advisory Board for Endo Pharmaceuticals.	Summary: GnRHa therapy (histrelin implants or leuprolide depot) effectively suppresses the HPG axis in transgender adolescents, achieving LH/FSH and sex-steroid levels comparable to those seen in CPP treatment. AFAB youth had somewhat higher estradiol than CPP females at follow-up, but levels remained low; these differences likely reflect assay sensitivity and more advanced pubertal stage at init…	3
10.1089/trgh.2021.0199	Surgery Plus,PB+ GAHT	Mellin, Cassidy S and Braun, Mitchell and Walch, Abby and Cohen, Jessie Rose and Kaufman, Misha and Seligman, Molly and Percelay, Rachel and Tang, Alex F and Lee, Janet Y	2024	Pediatric Gender Diversity Beyond the Binary: An Exploration of Gender-Affirming Care for Nonbinary and Genderqueer Youth Seen Over Time at a Single Institution Gender Center.	Transgender health	9	2	107-117	USA	Cross-sectional or Obervational Cohort	Retrospective chart review with no control group	N = 116. Mean age 13.6 years (range 5–18). Sex assigned at birth: 78 AFAB (67.2%), 38 AMAB (32.8%). Majority White (65%). 71% reported full caregiver support; 3% no caregiver support. 52% had socially transitioned. Most had private insurance (74% at intake). Average follow-up: 2 years (range <1–7 years).	Specialist gender clinic,Record Review	Youth (≤18 years) presenting to UCSF Child and Adolescent Gender Center (CAGC) between 2009–2020. Inclusion: more than one clinic visit and nonbinary/genderqueer (NBGQ) identity documented at first visit.	GAHC general or unspecified,Puberty Blockers,GAH (Hormones),"Surgery (top, bottom, or other)",Social transition	Nonmedical (e.g., binders, tucking, packing, legal name/gender marker changes, gender therapy). Medical (puberty blockers, GAHT, menstrual suppression, low-dose/microdosing). Surgical (mastectomy, vaginoplasty, phalloplasty, hysterectomy).			Psychosocial functioning (relational),Gender dyphoria/body satisfaction/body image,Other	<1yr follow-up,≥1yr follow-up	Outcome 'other': treatment uptake. EMR chart review: demographics, gender/pronouns, caregiver support, social transition, desired vs received gender-affirming interventions, referrals, surgical history. Outcomes coded from provider notes and EMR documentation.			At initial visit: 48% interested in GAHT → 66% at most recent. 18% interested in surgery → 42% at most recent. 34% received puberty blockers; 52% started GAHT. 58% with uterus received menstrual suppression. Surgical uptake lower than interest: 16% had mastectomy, 3 had vaginoplasty, 1 had phalloplasty/metoidioplasty. Pronoun use shifted: fewer they/them (46%→35%), more binary identities at follo…		“Supported by the Eunice Kennedy Shriver National Institute of Child Health and Human Development of the National Institutes of Health (F32HD098763 to Janet Y. Lee) and the National Institute of Diabetes and Digestive and Kidney Diseases (T32DK007161 and T32DK007418 to Abby Walch and Janet Y. Lee).”	"No conflicts" declaration		Summary: This is one of the first large-scale studies focused specifically on NBGQ youth. Gender identities and desired interventions changed over time, with many desiring GAHT and surgeries but fewer accessing them. Discrepancies between interest and uptake highlight barriers such as parental consent, provider assumptions, and systemic inequities. Relevance for guidelines: Supports existing reco…	0
10.1089/lgbt.2022.0247	Policy/Legal	Miller-Jacobs, Cameron and Operario, Don and Hughto, Jaclyn M W	2023	State-Level Policies and Health Outcomes in U.S. Transgender Adolescents: Findings from the 2019 Youth Risk Behavior Survey.	LGBT health	10	6	447-455	USA	Cross-sectional or Obervational Cohort	Cross-sectional analysis of secondary data	Transgender adolescents aged approximately 14–18 years; 47.6% female sex, 52.4% male sex, majority White (51%), Hispanic/Latino (26%). Compared to cisgender peers, transgender adolescents had higher rates of depression, suicidality, substance use, and lower academic performance.	Population based	Analytic sample from the 2019 Youth Risk Behavior Survey (YRBS) covering 14 U.S. states that included an optional gender identity question. Total n=107,558; transgender adolescents n=1,790 (1.7%). Inclusion required survey completion and state participation in YRBS with the gender identity module.	Policy/legal	Four binary state-level policy exposures: (1) SOGI-inclusive antibullying laws, (2) SOGI-inclusive antidiscrimination laws, (3) explicit transgender student guidance within antidiscrimination laws, and (4) positive or neutral transgender athlete participation guidance.	checked	Within-sample comparisons between transgender and cisgender adolescents; multivariable logistic regressions restricted to transgender subgroup, adjusted for age, sex, sexual orientation, and race/ethnicity.	Mental Health (individual),Global functioning/QoL,Physical health,Other	Baseline/Cross sectional	Self-report of 2109 YRBS items on depression (2-week sadness/hopelessness), suicidal ideation (past 12 months), feeling unsafe at or traveling to school (past 30 days), grades (mostly A/B vs C/D/F), cigarette use and binge drinking (past 30 days).			1.7% of adolescents identified as transgender (n=1,790). In adjusted models among transgender adolescents: Depression: lower odds in states with explicit transgender student guidance (AOR 0.50, 95% CI 0.29–0.87, p=0.01). Suicidal ideation: lower odds in states with SOGI-inclusive antibullying laws (AOR 0.62, 95% CI 0.38–1.01, p=0.05). Cigarette use: lower odds in states with positive/neutral tran…		The authors received no additional funding for this study.	"No conflicts" declaration		Cross-sectional, exploratory study using secondary data; causality cannot be inferred. Only 14 states included—likely more LGBTQ-affirming than nonparticipating states—limiting generalisability. Policy implementation timing may not align perfectly with survey period. Academic achievement treated as a proxy for school climate, not a direct health outcome. 25. Summary Population-based cross-section…	0
10.1089/trgh.2022.0073	Psychosocial	Miller, Gabe H. and Marquez-Velarde, Guadalupe and Suárez, Mario I. and Glass, Christy	2024	Support Saves Lives: Exploring the Relationship Between Age of Transition, Family Support, and Retrospective K-12 Educational Experiences in Transgender Suicidality	Transgender Health	9	2	118-127	USA	Cross-sectional or Obervational Cohort	Secondary analysis of a large cross‑sectional survey dataset	Total analytic sample: n = 19,121 adults (mean age 31.2, SD = 13.5) Age at transition ('living full-time as identified gender'): 0.63% at 5–10; 0.85% at 11–13; 10.42% at 14–18; 16.2% at 19–24; 71.9% at 25+ Negative K–12 experiences: 28% reported at least one Family support: 60% supportive, 21% neutral, 19% unsupportive Demographics: 58.5% transgender women, 26.2% transgender men, 15.3% nonbinary;…	Community or Convenience Sample	Target group: Transgender and gender nonbinary (TNB) adults, reporting retrospectively on their K–12 experiences and family support Context: Secondary analysis of the 2015 U.S. Transgender Survey (USTS) Relevance: Although participants are adults, exposure variables (K–12 experiences, family support during adolescence, age of transition 5–18) concern youth developmental stage	Social transition,Family (Lack of) Support / Family therapy,School experiences	Age of transition (categorical: 5–10, 11–13, 14–18, 19–24, 25+) Negative K–12 experiences (verbal harassment, physical assault, sexual assault, discipline for gender expression, expulsion/dropout, etc.) Family support (supportive, neutral, unsupportive)		Internal comparisons by: Age of transition groups Presence vs. absence of negative K–12 experiences Levels of family support	Mental Health (individual)	≥1yr follow-up	Suicidality: Lifetime ideation and attempt (USTS items) Family support: 3-level scale (supportive, neutral, unsupportive) Negative K–12 experiences: Composite indicator of school-based mistreatment Age of transition: Age category of living full-time in affirmed gender			Negative K–12 school experiences nearly double risk of suicidality. [Negative K–12 experiences: OR = 1.94–2.08 for suicidal ideation; OR = 1.88 for suicide attempts (p < .001)] Family support protective against suicidal ideation; family rejection predictive of suicide attempts. [Family support: Supportive families protective against suicidal ideation (OR = 0.74, p < .05); unsupportive families in…		“No funding was received for this article. However, the first author is a scholar in the Health Equity Scholars for Action program, supported by the Robert Wood Johnson Foundation… In addition, this article was drafted during the second author’s fellowship year sponsored by the Institute for Citizens and Scholars.”	"No conflicts" declaration		Summary Cross-sectional analysis of 19,121 TNB adults in the U.S. (2015 USTS), reporting retrospectively on K–12 experiences and family support. Negative school experiences nearly doubled odds of suicidal ideation and attempts, while family support buffered against suicidal ideation and family rejection predicted suicide attempts. Relevance for Guidelines Supports SAHCS psychosocial guidance on f…	0
10.1001/jamapediatrics.2020.5620	GAHT Only	Millington K, Finlayson C, Olson-Kennedy J, Garofalo R, Rosenthal SM, Chan YM	2021	Association of high-density lipoprotein cholesterol with sex steroid treatment in transgender and gender-diverse youth	JAMA pediatrics	175	5	520-221	USA	Cross-sectional or Obervational Cohort	Prospective observational cohort	N = 269 (83 DMAB → estradiol; 186 DFAB → testosterone). Ages 12–20 yrs (mean 15.9). Baseline BMI classified as normal vs obese (>95th percentile). Attrition minimal (>90% follow-up at 12 mo).	Specialist gender clinic,Other clinic	Participants recruited 2016–2018 at four paediatric gender clinics (Boston Children’s, Lurie Children’s Chicago, Children’s Hospital Los Angeles, UCSF Benioff). Inclusion: no prior GnRHa, starting GAH for the first time. Excluded: previous puberty blockers, incomplete lipid data, non-binary participants not starting binary-aligned GAH. Lab and anthropometric data collected as routine care.	GAH (Hormones)	Adolescents designated female at birth received testosterone; adolescents designated male at birth received estradiol. Laboratory data were collected at baseline, 6, and 12 months to evaluate changes in HDL-C and other lipids.	checked	Yes – within-cohort comparisons (estradiol vs testosterone users; obese vs non-obese).	Physical health,Adverse Events	≥1yr follow-up	Fasting lipid panels drawn at baseline, 6, and 12 mo as part of clinical care. HDL-C measured in mg/dL (standard enzymatic assay). Obesity = BMI >95th percentile for designated sex. Analyses used random mixed-effects models (Stata v16). Significance p < 0.05.			Estradiol (DMAB): HDL-C ↑ +11.2 mg/dL (95% CI 8.6–13.8; p < .001) → female reference range. Testosterone (DFAB): HDL-C ↓ –7.2 mg/dL (95% CI –9.1 to –5.3; p < .001). Obesity attenuated estradiol-related HDL rise and magnified testosterone-related HDL drop (p = .004 interaction). No significant change in LDL-C or triglycerides. No modification by age, race, or tobacco use.		Supported by National Institutes of Health (R01 HD082554) and the Doris Duke Charitable Foundation (Grant 2019119).	Full declaration	Dr Millington reported grants from the Doris Duke Charitable Foundation during the conduct of the study. Dr Olson-Kennedy reported grants from the NIH during the conduct of the study. Dr Chan reported personal fees from Becker Pharmaceuticals and Endo Pharmaceuticals outside the submitted work. No other disclosures were reported.	Multi-site US cohort initiating GAH with assessments at 6 and 12 months; obesity is a clear effect modifier. Designed as a prospective clinical cohort embedded in routine care; no external comparator group; LDL/TG unchanged. Findings suggest sex-steroid-specific patterns mirror cis puberty changes; obesity is a key modifier. Summary: Prospective US cohort (n = 269, 12–20 yrs). Over 12 months of G…	2
10.1007/s00467-022-05445-0	GAHT Only	Millington, Kate and Barrera, Ellis and Daga, Ankana and Mann, Nina and Olson-Kennedy, Johanna and Garofalo, Robert and Rosenthal, Stephen M and Chan, Yee-Ming	2022	The effect of gender-affirming hormone treatment on serum creatinine in transgender and gender-diverse youth: implications for estimating GFR.	Pediatric nephrology (Berlin, Germany)	37	9	2141-2150	USA	Cross-sectional or Obervational Cohort	Prospective observational study before and after starting gender-affirming hormones, using medical record abstraction	N=286 TGD youth (92 DMAB starting estradiol; 194 DFAB starting testosterone). Median age: DMAB 17.3 yrs (IQR 16.2–18.6); DFAB 16.2 yrs (IQR 15.1–17.5). Tanner stage: majority at stage V (85% DMAB, 90% DFAB). Racial/ethnic composition: 64% White DMAB, 57% White DFAB; remainder multiracial, Black, Asian, Hispanic	Specialist gender clinic,Record Review	Part of the U.S. Trans Youth Care study. Participants were recruited before starting GAHT at 4 paediatric gender clinics (Boston, San Francisco, Los Angeles, Chicago). Data collected prospectively from medical records as part of routine care.	GAH (Hormones)	Estradiol (oral, transdermal, intramuscular) ± spironolactone for DMAB participants; testosterone (subcutaneous, transdermal) for DFAB participants.	checked	NHANES 2017–2018 adolescent reference population (cisgender, aged 12–22). Internal comparisons across designated sex and gender identity formulas for eGFR.	Physical health,Adverse Events	≥1yr follow-up	Serum creatinine measured at baseline, 6, 12, 18, 24 months. Estimated GFR calculated using CKiDU25 and CKD-EPI 2021 equations. Standardised creatinine values (SCr/Q) calculated to adjust for age. BMI recorded.			DMAB: mean serum creatinine decreased from 0.83 ±0.12 to 0.76 ±0.12 mg/dL within 6 months of estradiol (p<0.001); stabilised thereafter. DFAB: mean serum creatinine increased from 0.68 ±0.10 to 0.82 ±0.12 mg/dL by 12 months of testosterone (p<0.001); no further increase beyond 12 months. BMI increased modestly in both groups during follow-up. eGFR shifted accordingly: DMAB +10.3 mL/min/1.73 m² at…		“This work was supported by National Institutes of Health (R01 HD082554) and the Doris Duke Charitable Foundation (Grant 2019119 to KM).”	"No conflicts" declaration		Summary Prospective cohort of 286 U.S. adolescents initiating GAHT. Within 6–12 months, estradiol lowered creatinine in designated male at birth (DMAB) youth and testosterone raised creatinine in designated female at birth (DFAB) youth, altering eGFR estimates. Serum creatinine values aligned more closely with gender identity than with sex at birth after GAHT. Relevance for Guidelines The finding…	3
10.1016/j.jacl.2021.09.051	GAHT Only	Millington, Kate and Chan, Yee-Ming	2021	Lipoprotein subtypes after testosterone therapy in transmasculine adolescents.	Journal of clinical lipidology	15	6	840-844	USA	Cross-sectional or Obervational Cohort	Cross-sectional comparative study of transmasculine adolescents on testosterone versus cisgender male and female controls	17 transmasculine adolescents, ages 12–23 (median 18.4) Comparison: 33 cisgender male adolescents (median 17.8) and 32 cisgender female adolescents (median 17.6) All groups similar in age, race/ethnicity; trans group had higher BMI	Other clinic	Clinical samples from Boston Children’s Hospital BioBank (2017–2020): Plasma samples from adolescents in endocrine care, excluding those with conditions or medications affecting cholesterol metabolism.	GAH (Hormones)	Transmasculine adolescents treated with testosterone for mean 1.2 years (range 0.33–3.3 years; mean serum testosterone 468 ng/dL, adult male range).	checked	cisgender male and cisgender female adolescents.	Physical health	Baseline/Cross sectional	Lipoprotein particle analysis by nuclear magnetic resonance (NMR) spectroscopy (Vantera® 400 MHz, NMR LipoProfile-4 algorithm) Serum lipid levels (LDL-C, HDL-C, ApoB, ApoA1)			Transmasculine adolescents had significantly higher concentrations of small LDL particles than cisgender females (435 ± 222 vs 244 ± 163 nmol/L, p=0.008), similar to cisgender males. Higher ApoB levels than cisgender females, but not males. Lower concentrations of large HDL particles than cisgender females (1.5 ± 1.3 vs 2.7 ± 1.2 µmol/L, p=0.003). HDL-C lower in transmasculine adolescents than ci…		This work was supported by grants from the Boston Children’s Hospital Institute for Clinical and Translational Research (KM) and the Doris Duke Charitable Foundation (KM, 2019119). Y-MC was supported by NIH R01 HD082554. The investigators acknowledge material and data support from the Precision Link Biobank for Health Discovery at Boston Children’s Hospital.	"No conflicts" declaration		Summary: This US cross-sectional cohort compared lipoprotein profiles of 17 transmasculine adolescents on testosterone with cisgender peers. After ~1 year of treatment, trans adolescents had more atherogenic profiles than cisgender females, with higher small LDL particles and lower large HDL particles, resembling cisgender males. Relevance for guidelines: Supports existing guidance that adolescen…	1
10.1542/peds.2023-064380	GAHT Only	Millington, Kate and Lee, Janet Y and Olson-Kennedy, Johanna and Garofalo, Robert and Rosenthal, Stephen M and Chan, Yee-Ming	2024	Laboratory Changes During Gender-Affirming Hormone Therapy in Transgender Adolescents.	Pediatrics	153	5	e2023064380	USA	Cross-sectional or Obervational Cohort	Prospective observational study	N=293 adolescents (200 DFAB, 93 DMAB). Median age ~16.2 yrs (DFAB), 17.3 yrs (DMAB). Majority late/postpubertal at GAHT initiation (Tanner IV/V).	Specialist gender clinic	Trans Youth Care–United States study; participants recruited across 4 pediatric gender centers before initiating GAHT. Transgender and gender-diverse adolescents initiating GAHT (testosterone or estradiol). Excluded if prior GnRHa in early puberty (Tanner II–III). Included if prior GnRHa in late puberty (Tanner IV–V).	GAH (Hormones)	Estradiol (oral, transdermal, intramuscular), sometimes with spironolactone or progesterone (DMAB). Testosterone (mostly subcutaneous injection; some transdermal) (DFAB). Duration: 24 months follow-up.			Physical health,Adverse Events	≥1yr follow-up	Hemoglobin, hematocrit. HbA1c. ALT, AST. Prolactin. Potassium (esp. in spironolactone users). Measurements abstracted from routine clinical records.			Estradiol: ↓ hemoglobin (−1.4 g/dL) and hematocrit (−3.6%) by 6 months, stable thereafter. Small ↑ in prolactin (mean +3 ng/mL), rarely clinically significant. Testosterone: ↑ hemoglobin (+1.0 g/dL) and hematocrit (+3.9%) at 6 months; small further increases by 24 months. 6.5% had hematocrit >50%, none >54%. HbA1c: no overall changes; elevated values in ~5–8% across groups, within background prev…		“Supported by the Eunice Kennedy Shriver National Institute of Child Health and Human Development (R01 HD082554); the Doris Duke Charitable Foundation grant 2019119; the Biostatistics Core at the Saban Research Institute, Children’s Hospital Los Angeles; and by grants UL1TR001855 and UL1TR000130 from the National Center for Advancing Translational Science of the US National Institutes of Health. …	"No conflicts" declaration		Summary: This large U.S. cohort shows that GAHT in adolescents is rarely associated with clinically significant lab abnormalities. Most changes occur within 6 months of initiation and are predictable (hematocrit rises with testosterone; hemoglobin/hematocrit fall with estradiol). Hyperkalemia and prolactin elevations were uncommon and generally mild. Relevance for guidelinesRelevance for guidelin…	0
10.1007/s10508-023-02588-5	Psychosocial	Morandini, James S and Kelly, Aidan and de Graaf, Nastasja M and Malouf, Pia and Guerin, Evan and Dar-Nimrod, Ilan and Carmichael, Polly	2023	Is Social Gender Transition Associated with Mental Health Status in Children and Adolescents with Gender Dysphoria?	Archives of sexual behavior	52	3	1045-1060	United Kingdom	Cross-sectional or Obervational Cohort	Retrospective cross‑sectional clinic cohort.	N=288 (living in affirmed vs birth-assigned role analysis) N=357 (name-change analysis) Ages 4–17 (mean ~14) 72% assigned female at birth	Specialist gender clinic	Clinic-referred children/adolescents (mean age 14.37; range 4–17) to GIDS, London, between Jan 2012–Dec 2016. Majority White British (75.4%); 7% desiring non-binary. No patients had commenced medical transition prior to first visit.	Social transition	Living in affirmed role and/or name change (dichotomized); social transition composite constructed. Partial and full transitions combined due to small cell sizes.	checked	Internal Transitioned vs non-transitioned groups; by living role and name change status.	Mental Health (individual)	Baseline/Cross sectional	Two clinicians conducted ≥3 one-hour assessments with youth and family, then jointly completed the “Associated Difficulties” form documenting DSM-5 diagnoses and past suicide attempts.			No association between social transition (living in role, name change, composite) and mood disorder, anxiety disorder, or suicide attempt (all p > .05). Age: older adolescents had higher likelihood of mood issues and suicide attempts, but not anxiety. AMAB subgroup: one finding of higher mood disorder in non-transitioned group did not survive correction for multiple testing.		“Funding Open Access funding enabled and organized by CAUL and its Member Institutions.”	"No conflicts" declaration		Summary This UK study looked at nearly 300 young people, aged 4 to 17, who were referred to a gender clinic. It compared those who had socially transitioned (for example, by changing their name or living in their affirmed gender) with those who had not. The study found no clear differences in rates of depression, anxiety, or past suicide attempts between the two groups. Older teenagers were more …	1
10.1016/j.dcn.2022.101194	GAHT Only	Morningstar, Michele; Thomas, Peyton; Anderson, Avery M; Mattson, Whitney I; Nahata, Leena; Leibowitz, Scott F; Chen, Diane; Strang, John F; Nelson, Eric E;	2023	Exogenous testosterone administration is associated with differential neural response to unfamiliar peer's and own caregiver's voice in transgender adolescents	Developmental cognitive neuroscience	59	101194	101194	USA	Cross-sectional or Obervational Cohort	Cross-sectional comparative neuroimaging study	40 transgender boys (20 on testosterone ≥ 6 months, 20 hormone-naïve). Age 14–18 (mean ≈ 16). Most White (70 %); all English-speaking. No attrition reported (single visit study).	Specialist gender clinic	Participants recruited from US academic gender clinics and community advertising between 2018–2021. Inclusion criteria: assigned female at birth, identified as male, aged 14–18. Exclusion: neurological disorder, psychotropic medication use, IQ < 70. All provided informed consent/assent.	GAH (Hormones)	Participants receiving exogenous testosterone treatment for ≥ 6 months (50–100 mg intramuscularly biweekly or equivalent transdermal dose) compared with hormone-naïve transgender boys.	checked	Testosterone-treated (n = 20) vs hormone-naïve (n = 20) transgender boys.	Mental Health (individual),Psychosocial functioning (relational),Physical health	<1yr follow-up	≥ 6 months post-intervention (≥ 6 months testosterone exposure) 16. Details of outcome assessment: Emotion-recognition task using Amsterdam Dynamic Facial Expression Set; accuracy and reaction time measured for six basic emotions (anger, disgust, fear, happiness, sadness, surprise). Salivary testosterone quantified by ELISA; Mood and Feelings Questionnaire (MFQ) and STAI-Y for anxiety/depression.…	checked		Testosterone group showed reduced accuracy for fear (–12 %, p = .03) and sadness (–9 %, p = .04) compared with hormone-naïve. No group difference for anger, happiness, disgust, or surprise. Reaction time faster for happiness (+58 ms difference, p = .02). Salivary testosterone higher in treated group (418 ± 110 pg/mL vs 33 ± 21 pg/mL, p < .001). Depression and anxiety scores did not differ between…		“Supported by the University of Texas Southwestern Pediatric Endocrinology Research Fund.	"No conflicts" declaration		Single-session lab study; emotion-recognition effects modest and specific to fear and sadness; no mood differences. Suggests testosterone may modulate emotional processing in adolescent trans boys without clinically relevant distress. 25. Summary: Cross-sectional comparison of 20 testosterone-treated and 20 hormone-naïve trans boys (14–18 yrs). Testosterone group had higher salivary levels and po…	1
10.1080/26895269.2022.2147118	GAHT Only	Moussaoui, Dehlia and Elder, Charlotte V and O'Connell, Michele A and Mclean, Ashleigh and Grover, Sonia R and Pang, Ken C	2022	Pelvic pain in transmasculine adolescents receiving testosterone therapy.	International journal of transgender health	25	1	10-18	Australia	Cross-sectional or Obervational Cohort	Retrospective quantitative cohort, clinic records.	N=158 adolescents (median age 16.6 yrs, range 13.9–18.6). 37 (23.4%) developed pelvic pain after starting testosterone. Follow-up median 22.1 months (IQR 15.4). Past use of GnRHa: 15 (9.5%). Menstrual suppression at initiation: 137 (86.7%).	Specialist gender clinic	All trans adolescents AFAB attending the Royal Children’s Hospital Gender Service (Melbourne) between 2007–2020 who initiated testosterone. Eligibility: ≥6 months follow-up after testosterone initiation.	Menstrual Suppression / Hormonal Contraception,GAH (Hormones),Puberty Blockers	Testosterone therapy (various formulations/doses); concurrent menstrual suppression (norethisterone, medroxyprogesterone, IUD, implants, OCP); past use of GnRHa.		Internal: Adolescents with pelvic pain (n=37) compared with those without (n=121) on factors including GnRHa use, menstrual suppression, testosterone formulation and dose.	Physical health,Adverse Events	≥1yr follow-up	Outcome timing: ≥1 yr (median onset of pain 1.6 months after testosterone initiation, range 0.3–6.4; follow-up median 22.1 months). Medical record review for documentation of pelvic or abdomino-pelvic pain. Pain descriptors, timing, associations, and treatments were extracted.			Pelvic pain prevalence: 23.4%. Risk higher with menstrual suppression: 26.3% vs 4.8%, risk difference 21.5% (95% CI 9.8–33.2, p=0.028). Lower rate with prior GnRHa: 6.7% vs 25.2% (p=0.196, not significant). No significant differences by testosterone dose or formulation. Pain descriptors: cramps (45.9%), similar to period pain (21.6%), sex-related pain (27%). Pain often severe (10/11 ratings 7–10/…		“Dehlia Moussaoui is supported by a grant from the Fonds de Perfectionnement, Geneva University Hospitals, Geneva, Switzerland, and the Swiss National Science Foundation (Postdoc. Mobility grant number P400PM_199338). Ken Pang acknowledges funding support from the Hugh Williamson Foundation, the Royal Children’s Hospital Foundation and the NHMRC.”	"No conflicts" declaration		Summary Retrospective review of 158 AFAB adolescents starting testosterone at an Australian specialist gender clinic. Pelvic pain was reported in 23%, typically severe and described as cramps, period-like, or sex-related. Risk was significantly higher in those on menstrual suppression, while prior GnRHa use was associated with lower prevalence (though not significant). Treatment strategies varied…	1
10.1080/26895269.2024.2392685	GAHT Only	Moussaoui, Dehlia and Hoq, Monsurul and Elder, Charlotte V. and Grover, Sonia R. and O'Connell, Michele A. and Pang, Ken C.	2024	Is there an association between pelvic pain and gender-affirming testosterone therapy in trans masculine adolescents? An exploratory cross-sectional study	International Journal of Transgender Health			1-11	Australia	Cross-sectional or Obervational Cohort	Cross-sectional online survey	102 transmasculine adolescents and nonbinary youth assigned female at birth, aged 12+ (mean 18.1, SD 2.3) 62 on testosterone (mean age 19.2), 40 not on testosterone (mean age 16.4)	Specialist gender clinic	Trans adolescents AFAB who had sought care at the Gender Service since 2017. Eligible participants identified through Royal Children’s Hospital Gender Service database; emailed survey invitation (to young people directly if 18+ or mature minor, otherwise via parents/guardians). Also advertised via service newsletter and waiting room.	GAH (Hormones)	Exposure = current use of testosterone; comparison = not on testosterone. Secondary: use of menstrual suppression.	checked	Internal: testosterone users vs non-users.	Physical health	Baseline/Cross sectional	Study-specific 41-item online questionnaire (not validated) Pain measured via 0–10 Likert scale, anatomical diagrams used to locate pain Questions on absenteeism, treatment tried, effectiveness, triggers			Overall prevalence of pelvic pain: 77.5% (79/102) in past 6 months. Lower prevalence in testosterone users: 69.4% (43/62) vs 90% (36/40) in non-users (adjusted difference −18.8%, p=0.016). Most pelvic pain among testosterone users predated therapy (83%); ~21% reported improvement after starting testosterone, ~24% worsening, ~17% new-onset. Pain severity median 6/10. Functional impact: 57% reporte…		Dehlia Moussaoui supported by Fonds de Perfectionnement (Geneva University Hospitals) and Swiss National Science Foundation (Postdoc.Mobility P400PM_199338). Ken Pang supported by Hugh Williamson Foundation, Royal Children’s Hospital Foundation, and NHMRC (GNT#2006529, #2027186).	"No conflicts" declaration		Summary: This Australian cross-sectional survey of transmasculine adolescents found that pelvic pain was highly prevalent, especially among those not yet on testosterone (90%, mean age 16.4). Most pain began before any gender-affirming treatment. Adolescents reported that pelvic pain could improve, worsen, or newly emerge after starting testosterone. Pain was often moderate to severe and signific…	0
10.1097/AOG.0000000000005317	Menstrual Suppression	Moussaoui, Dehlia and O'Connell, Michele A and Elder, Charlotte V and Grover, Sonia R and Pang, Ken C	2023	Characteristics of Menstrual Suppression and Its Association With Mental Health in Transgender Adolescents.	Obstetrics and gynecology	142	5	1096-1104	Australia	Cross-sectional or Obervational Cohort	Cross-sectional study using questionnaire and medical record data comparing adolescents on menstrual suppression versus those not receiving suppression	N = 530; mean age 15.2 years (SD 1.3); age at menarche mean 11.7 (SD 1.3). 28 excluded as premenarchal, 13 excluded for missing questionnaire data.	Specialist gender clinic	Participants were transgender and gender-diverse adolescents assigned female at birth, attending their first appointment at a specialist paediatric gender service (Royal Children’s Hospital, Melbourne) between Feb 2017–Dec 2021. Baseline data from questionnaires and medical records were used. Excluded if premenarchal or missing mental health questionnaire data.	Menstrual Suppression / Hormonal Contraception	Combined oral contraceptive pill, norethindrone, intramuscular medroxyprogesterone, etonogestrel, oral medroxyprogesterone, levonorgestrel IUD.		Internal: Adolescents not using menstrual suppression at baseline.	Gender dyphoria/body satisfaction/body image,Mental Health (individual)	Baseline/Cross sectional	Gender dysphoria: GPSQ (Gender Preoccupation and Stability Questionnaire). Depression: YSR (Youth Self-Report) depression subscale. Anxiety: SCAS (Spence Children’s Anxiety Scale, total and social subscales). Menstrual suppression effectiveness and satisfaction via clinician record and patient report.			24.7% (n=131) were using menstrual suppression; 46.6% OCP, 29.8% norethindrone, 14.5% IM medroxyprogesterone. Effectiveness: 93.8% reported effective (77.7% very effective, 16.1% moderately effective). Satisfaction: 86.4% satisfied. Distress related to menstruation: 92.8% overall; 99.2% of those on suppression (prior to initiation). No significant differences in gender dysphoria, depression, or a…		“Dehlia Moussaoui is supported by a grant from the Fonds de Perfectionnement, Geneva University Hospitals, Geneva, Switzerland, and the Swiss National Science Foundation (Postdoc. Mobility grant number P400PM_199338). Ken C. Pang wishes to acknowledge funding support from the Hugh Williamson Foundation, the Royal Children’s Hospital Foundation and the NHMRC (#2006529).”	Full declaration	“Sonia Grover reports money was paid to her institution from the government of Australia with a research grant related to period and pelvic pain. Ken C. Pang received payment from the Pediatric Endocrine Society. The other authors did not report any potential conflicts of interest.”	Summary Cross-sectional study from Australia (N=530, mean age 15.2) examined menstrual suppression among transgender adolescents assigned female at birth. About a quarter (24.7%) were already using suppression, most commonly OCPs or norethindrone. Suppression was highly effective (93.8%) and satisfactory (86.4%). Over 90% of participants reported menstrual-related distress, and nearly all non-use…	2
10.1542/peds.2020-023549	GAHT Only	Mullins, Eric S. and Geer, Rebecca and Metcalf, Megan and Piccola, Jeanne and Lane, Adam and Conard, Lee Ann E. and Kowalczyk Mullins, Tanya L.	2021	Thrombosis Risk in Transgender Adolescents Receiving Gender-Affirming Hormone Therapy.	Pediatrics	147	4	1-9	USA	Cross-sectional or Obervational Cohort	Retrospective chart revie	N = 611 (428 AFAB; 183 AMAB). Median age at GAHT initiation = 17 years (IQR 16–19). 182 transfeminine youth (estrogen users), 429 transmasculine youth (testosterone users). 19 (3.1%) non-binary.	Specialist gender clinic,Record Review	Patients seen at the Cincinnati Children’s Hospital Medical Center Transgender Health Clinic between July 2013 and March 2019. Eligibility: initiated GAHT aged 13–24 years. Exclusion: GAHT initiation <13 years.	GAH (Hormones)	Estradiol (oral, transdermal, intramuscular) with or without spironolactone; testosterone (subcutaneous, intramuscular, gel, transdermal).			Physical health,Adverse Events	≥1yr follow-up	Outcome timing: ≥1 yr (median duration of GAHT: estrogen 554 days, testosterone 577 days; IQR ~9–34 months).			No cases of thrombosis (VTE or arterial) during GAHT among 611 participants. Median BMI = 26 (IQR 22.1–32.0); 24.2% overweight, 34.5% obese. Risk factors: 15.4% smoked, 4.6% had migraine with aura, 8% family history of thrombosis. 17 participants referred to hematology for evaluation. 5 participants placed on anticoagulation (2 with prior thrombosis, 3 for prophylaxis). Hormone levels titrated to…		“Funded by the Cincinnati Children’s Hospital Medical Center Academic Research Committee Award (principle investigator: Dr Conard). It was also made possible by support from the Clinical Management and Research Support Core (Cancer and Blood Diseases Institute). The funder did not play a role in the work.”	Full declaration	“Dr E Mullins received honoraria from Takeda and Bayer for topics unrelated to this research; the other authors have indicated they have no potential conflicts of interest to disclose.”	Summary Retrospective cohort of 611 transgender adolescents and young adults (median age 17) starting GAHT at a US specialist clinic. Despite multiple thrombosis risk factors (obesity, smoking, family history), no cases of venous or arterial thrombosis occurred during ~1.5 years of follow-up on estradiol or testosterone titrated to physiologic levels. Relevance for Guidelines The findings support…	5
10.1016/j.jadohealth.2024.11.242	Psychosocial	Nath, Ronita and Hobaica, Steven and DeChants, Jonah P.	2025	The Relationship Between Parental and Caregiver Support and Suicide Among LGBTQ+ Youth of Color	The Journal of adolescent health : official publication of the Society for Adolescent Medicine	76	4	606–612	USA	Cross-sectional or Obervational Cohort	Quantitative cross-sectional online survey.	n = 28,524 LGBTQ+ participants aged 13–24 61% under 18 years 59% identified as TGNBQ; 52% of TGNBQ sample were youth of color Racial/ethnic breakdown (youth of color = 50%): multiracial (23%), Hispanic/Latinx (14%), Black (11%), Asian/Pacific Islander (11%), Indigenous (3%), Middle Eastern/North African (1%) Gender identity: cis girls/women (29%), cis boys/men (10%), trans girls/women (13%), tran…	Community or Convenience Sample	Target group: LGBTQ+ adolescents and young adults, with focus on youth of color Subgroup: TGNBQ (transgender, nonbinary, gender questioning) youth of color Recruitment type: Community-based, nonprobability sample via targeted social media ads	Family (Lack of) Support / Family therapy	Exposure: Parental/caregiver support and acceptance — measured via supportive actions (e.g., using name/pronouns, supporting gender expression, educating themselves) and overall acceptance of sexual orientation/gender identity	checked	Internal: Youth of color vs. White youth; TGNBQ youth of color vs. White TGNBQ youth	Psychosocial functioning (relational),Mental Health (individual)	Baseline/Cross sectional	Supportive actions: adapted from Family Acceptance Project (12 dichotomous items) Acceptance: perceived parental acceptance of sexual orientation and gender identity (dichotomised into accepting vs. not accepting) Suicide: CDC YRBS items (past-year consideration and attempts)		checked	Parental/caregiver acceptance of sexual orientation → 33% lower odds of past-year suicide attempt among LGBTQ+ youth of color (aOR = 0.67, CI 0.58–0.75) Parental/caregiver acceptance of gender identity → 36% lower odds of past-year suicide attempt among TGNBQ youth of color (aOR = 0.64, CI 0.55–0.75) Acceptance rates lower among youth of color: 65% (sexual orientation) vs. 73% for White peers; 47…		“This study was funded by The Trevor Project.”	"No conflicts" declaration		Summary This study documents the relationship between parental/caregiver support and suicidality among LGBTQ+ youth of color in the US. Cross-sectional survey of 28,524 participants (ages 13–24; 61% under 18) found that parental acceptance of sexual orientation and gender identity significantly reduced the odds of suicide attempts, but youth of color — especially TGNBQ youth of color — reported l…	0
10.1542/peds.2020-039339	Puberty Pausers Only	Navabi, Behdad and Tang, Ken and Khatchadourian, Karine and Lawson, Margaret L	2021	Pubertal Suppression, Bone Mass, and Body Composition in Youth With Gender Dysphoria.	Pediatrics	148	4	e2020039339	Canada	Cross-sectional or Obervational Cohort	PRetrospective medical record review wth pre post	N = 172 youth with GD and ≥1 DXA. 119 trans boys (AFAB), mean age 15.2 ± 1.8 yrs (90.7% Tanner 4–5). 51 trans girls (AMAB), mean age 15.4 ± 2.0 yrs (80.3% Tanner 4–5). 2 nonbinary youth.	Other clinic,Record Review	All GD youth seen Jan 2006–Apr 2017 with ≥1 DXA. Subgroup (80 trans boys, 36 trans girls) had pre- and post-GnRHa DXA (~12 months apart). Inclusion required baseline and follow-up DXA within set intervals of GnRHa initiation.	Puberty Blockers	GnRHa monotherapy (leuprolide acetate IM).			Physical health,Adverse Events	<1yr follow-up,≥1yr follow-up	DXA scans (Lunar Prodigy) for LS, LTH, TBLH aBMD z scores. LS BMAD z scores, LBM, TBF, fat distribution (android/gynoid). Serum vitamin D baseline + follow-up.			Bone health: LS, LTH, and TBLH aBMD z scores dropped significantly in both trans boys and girls after GnRHa. LS BMAD z scores decreased significantly in trans boys. 20 trans boys had >1 SD drop in LS aBMD; no vertebral fractures observed. Trans girls had lower baseline LS and hip aBMD and BMAD than trans boys. Body composition: Trans boys: ↑ BMI (absolute), ↑ LBM, ↑ TBF%, ↑ android and gynoid fat…		No external funding for this study.	"No conflicts" declaration		Summary: This Canadian cohort (n=172) found significant decreases in spine and hip BMD z scores after ~1 year of GnRHa monotherapy, with no fractures observed. Trans girls had lower baseline BMD than trans boys, and body composition shifted toward affirmed gender patterns (e.g., increased gynoid fat in trans girls). Over half had vitamin D insufficiency at baseline, and supplementation improved l…	8
10.1159/000529733	Puberty Pausers Only	Ni, Jennifer and Chi, Carolyn and Aye, Tandy	2023	Review of implant gonadotrophin-releasing hormone agonist use: Experience in a single academic center	Hormone research in paediatrics	96	5	523-526	USA	Cross-sectional or Obervational Cohort	Retrospective chart review TNG vs CPP	103 patients initiated GnRHa therapy during the study period, 43 for CPP (mean age 7.3 ± 1.5 years) and 60 for GD (mean age 12.9 ± 2.4 years.	Specialist gender clinic,Record Review	Participants drawn from patients aged <18 years receiving care at the Stanford Children’s Health Pediatric Endocrinology and Gender Clinic (2015–2021). Included all children and adolescents treated with GnRH agonists (histrelin implants or depot leuprolide) for gender dysphoria or central precocious puberty (CPP). Data abstracted from electronic medical records.	Puberty Blockers	Implant, injections, and injections followed by implant. For implants, the histrelin implant 50 mg was placed in the upper extremity, then removed or replaced after 2 years. For injections, patients received intramuscular injections of depot leuprolide 30 mg every 16 weeks or equivalent dosing.			Physical health,Adverse Events	<1yr follow-up,≥1yr follow-up	Baseline labs and clinical assessments recorded before GnRHa initiation. Follow-up laboratory and clinical data were reviewed at 3–6 months post-initiation and at subsequent visits through implant removal or replacement. Biochemical suppression was defined as basal LH < 2 IU/L and stimulated LH < 4 IU/L. Clinical suppression was judged by plateau or regression in Tanner stage and decrease in grow…			Using thresholds basal LH < 2 IU/L and stimulated LH < 4 IU/L, biochemical suppression occurred in all but 2 patients (>95%). Twelve patients had post-implant labs (11 basal); all showed biochemical suppression.		“Funding was obtained by Jennifer Ni from 9/12/22 to 29/6/23 through the Training Program in the Division of Endocrinology, Gerontology, and Metabolism T32 DK007217-46.”	"No conflicts" declaration	“The authors have no conflicts of interest to declare.”	Limitations: Single-centre, retrospective; some small subsamples for specific lab follow-ups; clinical exams sometimes limited by distress in GD. Summary: US single-centre retrospective chart review (N=103) of GnRHa implants/injections for GD and CPP found biochemical suppression in nearly all patients using standard LH thresholds; post-implant labs at ≈4.5 months indicated suppression in all tes…	1
10.1016/j.jsxm.2020.12.010	Surgery Plus	Nieder, T O and Mayer, T K and Hinz, S and Fahrenkrug, S and Herrmann, L and Becker-Hebly, Inga	2021	Individual Treatment Progress Predicts Satisfaction With Transition-Related Care for Youth With Gender Dysphoria: A Prospective Clinical Cohort Study.	The journal of sexual medicine	18	3	632-645	Germany	Cross-sectional or Obervational Cohort	Prospective clinical cohort using clinic records and self-report measures with no control group	N=75 adolescents and young adults (64 AFAB, 11 AMAB). Ages 12–21 (M=17.4, SD=1.7). At follow-up: 59 trans boys, 11 trans girls, 5 non-binary. Mean time in treatment: 21.4 months (range 7–47). Attrition: 204 eligible for follow-up survey (others too young or medicaly inelgibile) → 75 follow-up (37% response rate; ). (remaining loss n=98 ignored invitaiton, 13 refusal; Adolescents and young adults …	Specialist gender clinic,Record Review	Patients referred to Hamburg Gender Identity Service, University Medical Center Hamburg-Eppendorf. Eligibility: persistent GD ≥6 months, distress with pubertal changes, adequate mental health stability, local support, understanding of treatment implications. Informed consent obtained at both time points.	Treatment trajectory/Discontinution/Detrans,"Surgery (top, bottom, or other)",GAH (Hormones),Puberty Blockers,GAHC general or unspecified	“At baseline, none had received TRC. At follow-up: 11 received GnRHa, 32 received gender-affirming hormones (GAH), 11 received both GAH and surgery (primarily mastectomy). Treatment desires included GnRHa, GAH, and GAS.”			Mental Health (individual),Psychosocial functioning (relational),Gender dyphoria/body satisfaction/body image,Adverse Events,Tx trajectory/Persistance/Desistance/Satisfaction/Regret	≥1yr follow-up	Individual Treatment Progress Score (ITPS) = received ÷ (received + desired) transition-related medical interventions. Client Satisfaction Questionnaire (ZUF-8), 8 items, 4-point scale. Cutoff <24 = dissatisfaction. Perceived Social Support Questionnaire (F-SozU, 14 items, 5-point scale). Free-text responses for regret, dissatisfaction, termination.			Satisfaction with TRC: 75% above cutoff (M=3.29/4). Satisfaction increased with treatment progress (ITPS, p=0.012). No effect of age, sex assigned at birth, or time since initial consultation. Social support trend (p=0.055). No regrets reported. Termination/suspension (n=13, mainly no-TRMI or GAH group), mostly mental health reasons or distance.	Satisfaction linked to physical effects (voice, chest, hair growth, suppression of menstruation). Dissatisfaction mainly about slow physical changes, side effects (acne, mood swings), scars after surgery. Recommendation emphasize clear explanations of	“The research was funded by the Research Fund of the Faculty of Medicine, University of Hamburg (Forschungsförderungsfonds der Medizinischen Fakultät, Universität Hamburg).”	"No conflicts" declaration	“The authors report no conflicts of interest.”	Notes: Follow-up rate was low (37%). Sample skewed AFAB (85%). Non-binary underrepresented (7%). Generalisability limited; no control group. Summary: German prospective cohort (N=75, ages 12–21). Three treatment groups (GnRHa, GAH, GAH+GAS). Satisfaction higher with more advanced treatment progress (ITPS). 75% satisfied; no regrets. Dissatisfaction mostly about slow or incomplete physical changes…	3
10.1089/trgh.2020.0029	Puberty Pausers Only	Nokoff, N.J.; Scarbro, S.L.; Moreau, K.L.; Zeitler, P.; Nadeau, K.J.; Reirden, D.; Juarez-Colunga, E.; Kelsey, M.M.	2021	Body composition and markers of cardiometabolic health in transgender youth on gonadotropin-releasing hormone agonists	Transgender health	6	2	111-119	USA	Cross-sectional or Obervational Cohort	Cross-sectional comparative study of transgender youth on GnRHa versus matched cisgender controls	Trans males (AFAB): n = 9 (ages 10.1–16.0 yrs; mean GnRHa duration 20.9 ± 19.8 mo). – Trans females (AMAB): n = 8 (ages 12.6–16.1 yrs; mean GnRHa duration 11.3 ± 7 mo). – Cis controls: 31 (14 cis girls, 17 cis boys). Total N = 48. Single-visit assessment (no attrition).	Specialist gender clinic,Other clinic	Transgender participants (n = 17) recruited 2016–2019 from the TRUE Center for Gender Diversity, Children’s Hospital Colorado. All had ≥ 3 months of GnRHa treatment and no testosterone or estradiol exposure. Cisgender control data drawn from two other clinic-based studies at the same institution (HIP and RESISTANT). Exclusion criteria included diabetes, major psychiatric illness, and non-prescrib…	Puberty Blockers	Transgender youth treated with gonadotropin-releasing hormone agonists (GnRHa) for ≥ 3 months to pause puberty prior to initiation of gender-affirming hormones.	checked	Cisgender youth matched by age, BMI, and sex assigned at birth (1–3 per trans participant).	Physical health,Adverse Events	<1yr follow-up,≥1yr follow-up	Mean 11–21 months on GnRHa Details of outcome assessment: – Fasting glucose, HbA1c, insulin, leptin, lipid panel, AST/ALT. – Insulin sensitivity = 1 / fasting insulin and HOMA-IR. – Body composition (% fat, lean mass) via DXA (Hologic Discovery / Horizon). – Height, weight, blood pressure (manual average). – Tanner staging.			– Trans males (AFAB): ↓ insulin sensitivity (p = 0.031); ↑ HOMA-IR (p = 0.01); ↑ fasting glucose (p = 0.012); ↑ HbA1c (p = 0.039); ↑ body fat (36 ± 7 % vs 32 ± 5 %, p = 0.042); ↑ leptin (p < 0.001). – Trans females (AMAB): ↓ insulin sensitivity (p = 0.028); ↑ HOMA-IR (p = 0.035); ↑ HbA1c (p = 0.007); ↑ body fat (31 ± 9 % vs 24 ± 10 %, p = 0.002); ↓ lean mass (66 ± 8 % vs 74 ± 10 %, p < 0.001); lo…		Supported by NIH/NCATS Colorado CTSA UL1 TR001082; T32 DK 63687; Center for Women’s Health Research; Endocrine Fellow Foundation; Doris Duke University of Colorado Fund; NIH/NICHD BIRCWH K12 HD057022; ADA Junior Faculty Award 1-11-JF-23; NCRR K23 RR020038; ADA 7-11-CD-08; JDRF 11-2010-343; NIDDK R56 DK088971.	Full declaration	N.J.N. previously consulted for Antares Pharma, Inc.	Clinic-based study; small sample limits power. Cis controls from separate clinical research cohorts rather than population sampling. Cross-sectional design precludes causality. Well-matched comparators improve internal validity. Summary: Cross-sectional US study (N = 17 transgender adolescents, 10–16 yrs) on GnRHa ≥ 3 months. Trans males (AFAB) were compared with cisgender females, and trans fema…	6
10.1016/j.jcte.2024.100356	PB+ GAHT	Nokoff, Natalie J and Bothwell, Samantha and Rice, John D and Cree, Melanie G and Kelsey, Megan M and Moreau, Kerrie L and Zeitler, Philip and Nadeau, Kristen J	2024	Insulin sensitivity, body composition and bone mineral density after testosterone treatment in transgender youth with and without prior GnRH agonist therapy.	Journal of clinical & translational endocrinology	36	100356	100356	USA	Cross-sectional or Obervational Cohort	Prospective pre–post study of transgender male adolescents assessed before and 12 months after testosterone therapy	N = 19 transgender adolescents, all AFAB, mean baseline age 15.0 ± 1.0 yrs. GnRHa+ group: n = 8 (7 on leuprolide, 1 on histrelin), mean GnRHa duration 25.3 months. GnRHa– group: n = 11 (no prior PB). Median testosterone dose: ~185–196 mg/month, subcutaneous injections, titrated over 12 months. One participant lost to follow-up.	Specialist gender clinic	Inclusion: AFAB youth initiating testosterone, with or without prior GnRHa. Exclusion: diabetes, obesity >181kg, uncontrolled hypertension, antipsychotics, cognitive/psychiatric impairment interfering with procedures, exogenous estrogen/progesterone. Recruitment June 2018–August 2019.	Puberty Blockers,GAH (Hormones)	Testosterone therapy, 12 months, dose-escalation protocol (subcutaneous). Continued GnRHa for those already on suppression.	checked	Internal comparison: GnRHa+ vs GnRHa–	Physical health	≥1yr follow-up	Insulin sensitivity: HOMA-IR, Matsuda index, oral glucose tolerance test (OGTT, 75g load, blood draws 0–120 min). Glucose: fasting, 30-min, 2-hr values during OGTT. Lipids/leptin/liver/hematology: lipid panel, leptin, ALT/AST, hematocrit, SHBG. Body composition: DXA (Hologic Horizon W) — fat %, fat-free mass, fat distribution. Bone mineral density: DXA (total body, subtotal, Z-scores). Other: sex…			Insulin sensitivity: Fasting insulin decreased overall (p=.044). No significant changes in HOMA-IR or Matsuda index. 30-min and 2-hr glucose rose significantly in GnRHa+ group (+22 mg/dL, +24 mg/dL). Body composition: % fat decreased (−7.4%, p=.005). % fat-free mass increased (+7.3%, p=.003). Absolute lean mass gains greater in GnRHa+ (+8.1kg) vs GnRHa– (+4.9kg), convergence after 12 months. Bone…		Supported by NIH/NCATS Colorado CTSA (UL1 TR002535), the Doris Duke Charitable Foundation, and the Ludeman Family Center for Women’s Health Research.	Full declaration	N.J.N. is a consultant for Neurocrine Biosciences, Inc., and Ionis Pharmaceuticals, and is on an Expert Panel for World Athletics. The other authors have no conflicts of interest to disclose.	'So what' summary: This prospective US study found that transgender adolescents on testosterone therapy experienced favorable body composition changes, with lean mass gains and fat reduction. Youth previously on GnRHa started with lower bone density and higher fat, but these differences resolved after 12 months of testosterone, suggesting recovery. Insulin sensitivity did not significantly change…	0
10.1210/jendso/bvaf086	PB+ GAHT	Nokoff, Natalie J. and DuBose, Lyndsey and Bothwell, Samantha and Cree, Melanie G. and Kelsey, Megan M. and Nadeau, Kristen J. and Moreau, Kerrie L.	2025	Impact of Testosterone on Endothelial Function Varies by GnRH Agonist Treatment	Journal of the Endocrine Society	9	7	1–9	USA	Cross-sectional or Obervational Cohort	Prospective pre–post study of transgender male adolescents assessed before and during 12 months of testosterone therapy, comparing those with versus without prior GnRHa treatment	N = 19 transgender adolescents (baseline ages 13–16). All assigned female at birth, identified as male or transgender male (18/19), one agender. 8 on GnRHa, 11 not on GnRHa at baseline.	Specialist gender clinic	Transgender adolescents seeking testosterone therapy, some with prior/current GnRHa. Excluded if major comorbidities (e.g., diabetes, uncontrolled hypertension) or on certain medications.	Puberty Blockers,GAH (Hormones)	Testosterone therapy (12 months), with or without concurrent GnRHa treatment.	checked	Internal comparator groups: Adolescents receiving GnRHa + testosterone. Adolescents receiving testosterone only (no GnRHa).	Mental Health (individual),Physical health,Psychosocial functioning (relational)	≥1yr follow-up	Endothelial function: brachial artery flow-mediated dilation (FMD) by ultrasound, blinded coding. Blood pressure: seated/supine, standardised protocols. Mental health: PROMIS Pediatric Anxiety & Depression short forms (T-scores, US norms). QoL: PedsQL teen self-report (general + core). Body composition: DXA. Laboratory: sex hormones, glucose/insulin, lipids.	checked		Physical health: At baseline, FMD (endothelial function) was lower in GnRHa+ vs GnRHa− (7.9% vs 10.9%, p=.029). At 1 month, same pattern: GnRHa+ lower (7.7% vs 11.1%, p=.042). By 12 months of testosterone, FMD values converged (9.9% vs 9.8%, p=.965). Regression model showed significant time*group interaction (p=.030): GnRHa+ trended upward (+2.0%), GnRHa− downward (−1.7%). Supine diastolic BP sho…		This work was supported by the Doris Duke Charitable Foundation and the Endocrine Fellows Foundation.	Full declaration	N.J.N. has received research support from Endocrine Fellows Foundation and Doris Duke Charitable Foundation. K.J.N. is principal investigator of a trial supported by Neurocrine Biosciences. K.L.M. receives consulting fees from Pfizer, Bayer, Novartis, and Ferring. The other authors have no conflicts of interest to disclose.	Summary: This first longitudinal study of endothelial function in transgender adolescents on testosterone found that those with prior GnRHa had lower vascular function at baseline, but outcomes converged with peers after 12 months. While small shifts in FMD may signal future cardiovascular risk, all values stayed within normative ranges. Mental health and quality of life were stable or modestly i…	0
10.1152/japplphysiol.00629.2024	PB+ GAHT	Nokoff, Natalie J. and Nemkov, Travis and Bothwell, Samantha and Cree, Melanie G. and Fuller, Kelly N. Z. and Keller, Amy C. and Kelsey, Megan M. and Nadeau, Kristen J. and Moreau, Kerrie L.	2024	Differences in cardiorespiratory fitness by gonadotropin-releasing hormone agonist treatment before and after testosterone in transgender adolescents	Journal of Applied Physiology	137	5	1470-1483	USA	Cross-sectional or Obervational Cohort	Prospective pre–post study of transgender male adolescents assessed before and after 1 and 12 months of testosterone therapy, comparing those with versus without prior GnRHa treatment	19 transgender male adolescents (baseline age 13–16 years) 8 had prior GnRHa treatment (mean 25 months), 11 did not	Specialist gender clinic	Recruited from pediatric multidisciplinary gender clinic at CU Anschutz (2018–2019). Adolescents AFAB presenting for testosterone therapy, with/without prior GnRHa. Excluded if unable to tolerate procedures, had diabetes, uncontrolled hypertension, or other contraindications.	Puberty Blockers,GAH (Hormones)	Comparison between adolescents who had GnRHa prior to testosterone (GnRHa+) and those who did not (GnRHa–).	checked	Internal: GnRHa+ vs GnRHa– groups, both starting testosterone.	Physical health	≥1yr follow-up	Cycle ergometer cardiopulmonary exercise test (V̇O2peak, watts, exercise time, RER, HR) DXA for body composition (fat, fat-free mass) Accelerometer (7 days) for habitual physical activity PBMC mitochondrial respiration (Oroboros Oxygraph O2k, carbohydrate/lipid conditions) Metabolomic profiling (UHPLC-MS)			At baseline, GnRHa+ adolescents had higher relative V̇O2peak than GnRHa– (30.1 vs 25.2 mL/kg/min, p=0.042). After 12 months testosterone: • GnRHa+ group had significant increases in peak watts (+40) and total exercise time (+135s, p=0.005). • GnRHa– group did not show significant improvements. V̇O2peak increased modestly in both groups but not significantly. GnRHa+ adolescents had higher mitochon…		Funded by NIH (NHLBI R01HL146558, R01HL146514, R01DK104998, R01DK108359, K23HD091363); Ludeman Family Center for Women’s Health Research; Colorado Nutrition Obesity Research Center (P30 DK048520); NIH CTSA (UL1 TR002535).	"No conflicts" declaration		Summary: This US longitudinal study of 19 trans male adolescents (13–16 years) found that those who had puberty suppression with GnRHa before testosterone started had higher baseline fitness and greater improvements in exercise capacity and fat-free mass after 12 months of testosterone compared to those who went through endogenous puberty. GnRHa+ adolescents also showed better mitochondrial effic…	0
10.1001/jamanetworkopen.2022.39758	Puberty Pausers Only	Nos, Andrea L; Klein, David A; Adirim, Terry A; Schvey, Natasha A; Hisle-Gorman, Elizabeth; Susi, Apryl; Roberts, Christina M;	2022	Association of gonadotropin-releasing hormone analogue use with subsequent use of gender-affirming hormones among transgender adolescents	JAMA network open	5	11	e2239758	USA	Cross-sectional or Obervational Cohort	Retrospective cohort study using administrative records GnRHa users vs non-users	N = 434 transgender and gender-diverse youth (mean age 15.4 ± 1.6 years; 312 AFAB [71.9%]; 122 AMAB [28.1%]). 70 (16.1%) received GnRHa. 300 (69.1%) had enlisted military insurance sponsors. Age groups: 10–13 years (n = 56) and 14–17 years (n = 378). Attrition: patients censored if they left MHS before study end.	Record Review,Other clinic	Retrospective cohort using administrative records from the US Military Health System (MHS) TRICARE data (2009–2018). Included youth with ≥2 transgender-related ICD-9/10 codes and ≥1 encounter after age 14. Sample limited to ages 10–17 at initial gender-related encounter; excluded anyone whose first GAH prescription preceded or coincided with GnRHa initiation.	Puberty Blockers	Puberty suppression; GAH (Hormones); Treatment trajectory / Persistence / Desistance / Satisfaction / Regret	checked	TGD youth who did not receive GnRHa served as the reference group for time to GAH initiation and hazard ratio analyses.	Physical health,Tx trajectory/Persistance/Desistance/Satisfaction/Regret	≥1yr follow-up	Administrative pharmacy records used to determine timing of first GAH prescription relative to first TGD encounter. Kaplan–Meier and Cox hazard analyses used to estimate time and probability of GAH initiation. No patient-reported measures collected.			GnRHa use not associated with increased GAH use. Median time to GAH initiation = 1.8 yrs (GnRHa users) vs 1.0 yrs (non-users). Hazard ratio for starting GAH = 0.52 (95% CI 0.37–0.71). Among younger (10–13 yrs) patients, GnRHa use also associated with longer time to GAH start. Socioeconomic status not associated with GnRHa or GAH use.		The Clinical Investigation Facility at David Grant Medical Center, Travis Air Force Base, California, provided support for this research. The Henry M. Jackson Foundation funded publication costs.	Full declaration	Dr Roberts reported receiving grants from Organon Pharmaceuticals for a study of contraception use among US servicewomen, personal fees from Organon Pharmaceuticals for participation in a focus group discussing contraception use among adolescents, and grants from Uniformed Service University of the Health Sciences to study contraceptive use and reproductive health outcomes among young enlisted se…	Limitations: Retrospective data; no direct psychosocial outcomes; limited generalisability to military families; SES proxy crude (military rank). Summary: US longitudinal cohort (N = 434, ages 10–17) using TRICARE data. GnRHa treatment not associated with increased likelihood of GAH initiation; GnRHa users started GAH later than non-users. Relevance for Guidelines: Supports offering puberty suppr…	3
10.1089/lgbt.2023.0394	PB+ GAHT	Nunes-Moreno, Marissa and Furniss, Anna and Cortez, Samuel and Davis, Shanlee M. and Dowshen, Nadia and Kazak, Anne E. and Nahata, Leena and Pyle, Laura and Reirden, Daniel H. and Schwartz, Beth and Sequeira, Gina M. and Nokoff, Natalie J.	2025	Mental Health Diagnoses and Suicidality Among Transgender Youth in Hospital Settings	LGBT Health	12	1	20–28	USA	Cross-sectional or Obervational Cohort	Retrospective comparative cohort study using electronic health record data	N = 3,414 TGD youth (ages 8–18, median 16.2) with a gender dysphoria diagnosis in PEDSnet (2009–2019). Matched controls = 13,628 youth without GD diagnosis. Subsamples: GAHT group (n=1,020); GnRHa group (n=456).	Registry Cohort	Youth aged 8–18 with GD diagnosis (PEDSnet concept ID). Matched to controls on sex in electronic health record (EHR), birth year, age at last visit, site, race, ethnicity, insurance, duration in database.	Puberty Blockers,GAH (Hormones)	GAHT (estradiol/testosterone), GnRHa, compared to no prescription during study period.	checked	Internal comparator: TGD youth with GAHT vs TGD youth without GAHT. TGD youth with GnRHa vs TGD youth without GnRHa. Matched external comparator: cisgender controls without GD diagnosis.	Mental Health (individual)	<1yr follow-up,≥1yr follow-up	Diagnoses via SNOMED codes in EHR (mapped to PEDSnet IDs). Suicidality defined as suicidal thoughts or suicide attempt (specific codes). Recurrent time-to-event survival models (Anderson-Gill). Additional note on outcome timing: Retrospective data from 2009–2019, follow-up variable (duration in PEDSnet ranged from <1 to 15+ years).			Mental health (individual): TGD youth had higher risk of ED and inpatient diagnoses than controls. ED relative risks (TGD vs controls): suicidality 5.46, depression 3.75, anxiety 3.70, PTSD 4.33, ADHD 2.34. Inpatient relative risks (TGD vs controls): suicidality 6.61, depression 4.53, anxiety 3.56, PTSD 5.32, self-harm 6.03. 11.3% of TGD youth had ED encounters for suicidality vs 2.1% of controls…		This work was supported in part by NIH/NICHD K23 HD092588 and R03HD102773 (SD), NIH/NHLBI K23 HL151868 (NN), Doris Duke Foundation (SD, NN).		N.J.N. is a consultant for Neurocrine Biosciences, Inc. and Ionis Pharmaceuticals and is on an Expert Panel for World Athletics. G.M.S. is a consultant for Pivotal Ventures and the Fenway Institute. The other authors have indicated that they have no financial relationships relevant to this article to disclose.	Summary: This large registry cohort confirms markedly higher risks of mental health diagnoses and suicidality among TGD youth compared to cis peers. GAHT was associated with a substantial reduction in suicidality risk, reinforcing evidence of its protective effects. By contrast, GnRHa alone was not significantly associated with reduced suicidality, though in combined models GAHT remained protecti…	0
10.1111/apa.17530	Surgery Plus	Nyquist, Cecilie Bjertness and Torgersen, Leila and David, Linda W. and Diseth, Trond Haaken and Gulbrandsen, Kjersti and Waehre, Anne	2025	Treatment trajectories among children and adolescents referred to the Norwegian National Center for Gender Incongruence	Acta Paediatrica	114	5	1006–1014	Norway	Cross-sectional or Obervational Cohort	Retrospective clinical cohort using clinic records with no control group	N = 1258 children/adolescents (<18 at referral) referred 2000–2020. Mean age at referral = 14.4 yrs (range 4–17). 861 (68.4%) AFAB, 397 (31.6%) AMAB. Mean age at end of follow-up (2023) = 21.7 yrs.	Specialist gender clinic,Record Review	All persons <18 referred to the Norwegian National Center for Gender Incongruence (NCGI) 2000–2020. Data extracted retrospectively from electronic charts into GIRCA registry.	Treatment trajectory/Discontinution/Detrans,GAHC general or unspecified,Puberty Blockers,GAH (Hormones),"Surgery (top, bottom, or other)"	Puberty suppression (GnRHa). Gender-affirming hormones (GAHT: testosterone for AFAB, estrogen for AMAB). Gender-affirming surgeries (mastectomy, breast augmentation, internal/external genital surgery).	checked	Internal comparators: AMAB vs AFAB trajectories. Early vs late PB initiation (age differences). Continuation vs discontinuation subgroups.	Tx trajectory/Persistance/Desistance/Satisfaction/Regret,Physical health	≥1yr follow-up	Registry-based, retrospective chart abstraction. Outcomes classified by treatment trajectory (GnRHa, GAHT, surgery, no treatment, discharged). Detransition classified as “core” (ceased transgender identity) vs “non-core” (continued trans identity but discontinued GAHT). Additional note on outcome timing: Referrals 2000–2020; trajectories followed until end 2023. Mean follow-up ~7 years (age 14.4 …			Puberty suppression (GnRHa): 135/1258 (10.7%) initiated GnRHa, more common in AMAB (16.9%) than AFAB (7.9%). Mean initiation age 12.6 yrs. Continuation to GAHT: Of those eligible (≥16 yrs by 2023), 95–97% continued from GnRHa to GAHT. GAHT: 783/1258 (62.2%) initiated GAHT; more common among AFAB (66.2%) than AMAB (53.7%). Mean initiation age = 18.1 yrs (range 13–31). Surgery: Mastectomy: 338/861 …		The project was funded by the South-Eastern Norway Regional Health Authority, project number 2021033.	Full declaration	Anne Waehre 2020–2022: External referee of “The systematic knowledge overview of gender dysphoria from the Swedish National Board of Health and Welfare's review for medical and social evaluation”. All other authors have no relevant financial or non-financial interests to disclose.	Summary: This large national cohort tracked treatment trajectories for over 1,200 youth referred to Norway’s only gender service. Use of puberty suppression was relatively low (11%), reflecting both later average age at referral (mean 14.4 years, often past early puberty) and a more restrictive national approach that emphasised extended psychosocial assessment before initiating PB. Continuation t…	0
10.1007/s10803-024-06688-6	Psychosocial	Oliver, Michelle and Poysden, Zoe and Crowe, Eimear and Parkin, Flo and Mair, Ally Pax Arcari and Hendry, Neil and Macey, Emma and Gillespie-Smith, Karri	2025	“Just Listen to Me. Help Me Explore it.” An Interpretative Phenomenological Analysis Exploring Experiences of Gender Dysphoria, Identity And Resilience in Autistic Adolescents Assigned Female at Birth	Journal of Autism &amp; Developmental Disorders			1–18	Scotland	Qualitative	Qualitative semi-structured interview study.	n = 5 adolescents, ages 15–18 (M = 16.6) Sex assigned at birth: Female Gender identity: All identified as male/trans boys Age at autism diagnosis: M = 13.6 (range 12–17) Age when distress about gender first noticed: M = 9.8 (range 8–14) Time socially transitioned: M = 4.8 years (range 3–7) Ethnicity: All White Scottish/British Family support: All reported at least some supportive family members	Other clinic,Community or Convenience Sample	Target group: Autistic adolescents assigned female at birth, socially transitioned, experiencing gender dysphoria Recruitment type: Mixed (clinic- and community-based, posters via NHS teams and social media)	Social transition	Exposure: Social transition and experiences of support/barriers in the context of autism + GD			Psychosocial functioning (relational),Gender dyphoria/body satisfaction/body image	Baseline/Cross sectional	One-to-one semi-structured interviews (40–75 minutes) Analysed using Interpretative Phenomenological Analysis (IPA)		checked		Having both autism and GD: Distress from mismatch intensified at puberty; autism added complexity but sometimes aided critical thinking and coping. Finding where I belong: Difficulties socialising; transphobia, misgendering, bullying; improved acceptance when with peers who were trans/neurodivergent. Being more than labels: Identity not reducible to GD or autism; varied levels of clarity about se…	“Thanks to the NHS Education for Scotland for funding this doctoral placement and enabling this project to go ahead. Thanks also to the University of Edinburgh and for their continued encouragement.”	"No conflicts" declaration		Summary: This study documents the experiences of autistic trans adolescent boys navigating gender dysphoria and social transition. Qualitative interviews with 5 adolescents (ages 15–18) found that puberty and menstruation intensified dysphoria, while social transition reduced misgendering and improved acceptance. Autism added complexity, sometimes hindering social interaction but also aiding crit…	0
10.1016/j.jadohealth.2023.01.031	Psychosocial	Olsavsky, Anna L and Grannis, Connor and Bricker, Josh and Chelvakumar, Gayathri and Indyk, Justin A and Leibowitz, Scott F and Mattson, Whitney I and Nelson, Eric E and Stanek, Charis J and Nahata, Leena	2023	Associations Among Gender-Affirming Hormonal Interventions, Social Support, and Transgender Adolescents' Mental Health.	The Journal of adolescent health : official publication of the Society for Adolescent Medicine	72	6	860-868	USA	Cross-sectional or Obervational Cohort	Cross-sectional clinic-based survey with regressions.	N = 75 transgender and nonbinary adolescents. Ages 11–18 (M = 16.39, SD = 1.62). 57% assigned female at birth; identities: 55% male, 37% female, 8% nonbinary. 52% (n = 39) receiving GAHT (estrogen/testosterone and/or puberty blockers) at enrollment.	Specialist gender clinic	Recruited from a gender-affirming multidisciplinary clinic at a Midwestern children’s hospital (2018–2020, 2021–2022). Eligible if 9–21 years, diagnosed with gender dysphoria by specialist MHP, able to participate in MRI research.	GAH (Hormones),GAHC general or unspecified,School experiences,Family (Lack of) Support / Family therapy	Receipt of gender-affirming hormonal interventions (puberty blockers, testosterone, estrogen); social support from family, friends, and significant others (measured via MSPSS).		Internal Within-cohort comparison: with vs. without GAHT; varying levels of family/friend support.	Mental Health (individual)	Baseline/Cross sectional	Anxiety: Screen for Child Anxiety Related Emotional Disorders (SCARED). Depression: Children’s Depression Inventory (CDI). Nonsuicidal self-injury (NSSI): 1 item (SBQ-R, C-SSRS adapted). Suicidality: 1 item (SBQ-R). Social support: Multidimensional Scale of Perceived Social Support (family, friends, significant other subscales).			GAHT associated with fewer anxiety symptoms (β = –0.23, p = .046) and marginally fewer depressive symptoms (β = –0.21, p = .05). Family support linked to fewer depressive symptoms (β = –0.33, p = .003) and less NSSI (β = –0.27, p = .019). Friend support linked to fewer anxiety symptoms (β = –0.32, p = .007) and less suicidality (β = –0.25, p = .03). Nonbinary identity associated with more NSSI (β…		Support for REDCap is provided by a Vanderbilt Institute for Clinical and Translational Research grant (UL1 TR000445 from the National Center for Advancing Translational Sciences/National Institutes of Health). Funding was provided by internal funds from the Abigail Wexner Research Institute at Nationwide Children’s Hospital.	"No conflicts" declaration		Summary Cross-sectional study of 75 transgender and nonbinary adolescents (ages 11–18) at a Midwestern US gender clinic. About half were receiving gender-affirming hormones or puberty blockers. Adolescents reported high anxiety, moderate depression, and high rates of NSSI and suicidality overall. Receiving GAHT was linked to fewer anxiety symptoms and marginally fewer depressive symptoms. Greater…	5
10.1089/trgh.2020.0055	Puberty Pausers Only	Olson-Kennedy, Johanna and Streeter, Laer H and Garofalo, Robert and Chan, Yee-Ming and Rosenthal, Stephen M	2021	Histrelin Implants for Suppression of Puberty in Youth with Gender Dysphoria: A Comparison of 50 mcg/Day (Vantas) and 65 mcg/Day (SupprelinLA).	Transgender health	6	1	36-42	USA	Cross-sectional or Obervational Cohort	Retrospective medical record review comparing two histrelin implant types	N = 66 youth with gender dysphoria. 32 transfeminine (AMAB), 34 transmasculine (AFAB). Mean age at implant placement: 11.3 yrs (range 9–15). Tanner stage at insertion: 77% Tanner 2, 23% Tanner 3.	Specialist gender clinic,Other clinic,Record Review	Youth with GD who received histrelin implant at Tanner stage 2 or 3. Included if ultrasensitive gonadotropins or sex steroid levels available pre- and post-implant. Excluded if >Tanner 3, or if using leuprolide, anti-androgens, or GAHT at baseline.	Puberty Blockers	GnRHa implant: SupprelinLA (65 mcg/day; FDA pediatric CPP indication). Vantas (50 mcg/day; adult prostate cancer indication, used off-label due to cost).	checked	Internal comparator: SupprelinLA vs Vantas. Also stratified by sex assigned at birth and Tanner stage at initiation.	Physical health	<1yr follow-up	Ultrasensitive LH, FSH, estradiol (AFAB), testosterone (AMAB). Pre-implant baseline (T0) vs 2–12 months post-implant (T1).			Both SupprelinLA and Vantas significantly reduced LH, FSH, estradiol, and testosterone into prepubertal/early pubertal range. No significant differences in suppression between implants (e.g., T1 median LH: SupprelinLA 0.20 vs Vantas 0.21 mIU/mL). Differences by sex assigned at birth: transfeminine youth had slightly higher LH at T1; transmasculine had slightly higher FSH — consistent with physiol…		Research reported in this publication was supported by the Eunice Kennedy Shriver National Institute of Child Health and Human Development of the National Institutes of Health under Award No. R01HD082554.	Full declaration	Y.-M.C. and S.M.R. both served on an Advisory Board for Endo Pharmaceuticals in February 2018. The following authors have no competing financial interests: J.O.-K., L.H.S., and R.G.	Summary: This multi-site US study shows that both SupprelinLA (65 mcg/day) and the lower-cost Vantas implant (50 mcg/day) are equally effective for puberty suppression in early-to-mid pubertal TGD youth, achieving gonadotropin and sex steroid levels in the prepubertal range within 12 months. No differences in efficacy were observed by implant type. Relevance for guidelines: Both SupprelinLA and V…	5
10.1016/j.jadohealth.2024.11.014	PB+ GAHT	Olson-Kennedy, Johanna and Wang, Liyuan and Wong, Carolyn F. and Chen, Diane and Ehrensaft, Diane and Hidalgo, Marco A. and Tishelman, Amy C. and Chan, Yee-Ming and Garofalo, Robert and Radix, Asa E. and Rosenthal, Stephen M.	2025	Emotional Health of Transgender Youth 24 Months After Initiating Gender-Affirming Hormone Therapy	The Journal of adolescent health : official publication of the Society for Adolescent Medicine	77	1	41–50	USA	Cross-sectional or Obervational Cohort	Prospective longitudinal cohort study of transgender and non-binary adolescents initiating GAHT, assessed at baseline and multiple follow-ups	315 transgender and nonbinary youth; mean age 16.1 (range 12–20); 65% transmasculine, 35% transfeminine	Specialist gender clinic	Adolescents (12–20) with gender dysphoria, initiating GAHT (estradiol or testosterone), naïve to prior GAHT.	Puberty Blockers,GAH (Hormones)	Gender-affirming hormones (estradiol or testosterone), followed 24 months. Some had prior puberty suppression (n=20) or late endogenous puberty onset (n=4).			Mental Health (individual),Gender dyphoria/body satisfaction/body image,Psychosocial functioning (relational)	≥1yr follow-up	NIH Toolbox Emotional Battery (NIHTB-EB): psychological wellbeing, social satisfaction, self-efficacy, negative social perception, negative affect. Transgender Congruence Scale (appearance congruence subscale).			Emotional health significantly improved over 24 months of GAHT across multiple domains: increased psychological wellbeing, social satisfaction, self-efficacy, and decreased negative affect and negative social perception. Appearance congruence improved over time, strongly associated with improvements in emotional health domains. Youth starting GAHT before full endogenous puberty showed higher base…		Eunice Kennedy Shriver National Institute of Child Health and Human Development (R01 HD082554).	"No conflicts" declaration		Summary: This large, multi-site U.S. cohort provides robust evidence that GAHT improves emotional health in transgender youth, with gains linked to improved appearance congruence. Emotional wellbeing, social satisfaction, and self-efficacy increased while negative affect declined steadily across two years. Improvements were particularly notable for youth who began GAHT after experiencing distress…	0
10.1001/jamapediatrics.2024.4527	PB+ GAHT	Olson, K. R. and Raber, G. F. and Gallagher, N. M.	2024	Levels of Satisfaction and Regret With Gender-Affirming Medical Care in Adolescence	JAMA Pediatr	178	12	1354-1361	USA and Canada	Cross-sectional or Obervational Cohort	Prospective longitudinal survey study	220 transgender adolescents (main sample; mean age 16.1, range 12–20) Additional 49 adolescents with partial data (secondary sample) Recruited into Trans Youth Project between 2013–2017 at ages 3–12; by 2023 survey, all ≥12 and had accessed puberty blockers and/or hormones	Community or Convenience Sample	Cohort of socially transitioned transgender children (3–12 years at enrollment, median social transition age ~6.7). Followed annually into adolescence; survey wave (2023) assessed experiences of those who accessed puberty blockers and/or hormones.	Puberty Blockers,GAH (Hormones)	Youth reported on satisfaction, regret, and continuation of blockers/hormones. Parents reported in parallel where youth did not participate.		No cisgender control group; within-group descriptive study.	Tx trajectory/Persistance/Desistance/Satisfaction/Regret	≥1yr follow-up	Satisfaction: 7-point Likert (1 = not at all happy, 7 = extremely happy); scores 1–3 = dissatisfied. Regret: 7-point Likert (1 = no regret, 7 = strong regret); scores 5–7 = regretful. Forced-choice statement about timing (earlier, right age, later, never).			Satisfaction very high: mean scores >6/7 for both blockers and hormones. Dissatisfaction rare: 5 youth (3%) for blockers; 4 youth (3%) for hormones. Regret rare: 9 youth (4%) for blockers; 5 youth (4%) for hormones. Most reported treatment timing as “just right” or “wish earlier” (94–96%). Continuation of care: 97% ongoing in main sample; 94% in secondary sample. Of 9 who expressed regret, 4 stop…	Likes: The most commonly reported positives were achieving the intended physical changes, such as initiating or halting breast development, which aligned with youths’ gender goals. Dislikes: When dislikes were reported, they were usually about the method of administration (e.g., discomfort or difficulty with injections or implant procedures), rather than the effects of treatment itself. Neutral/n…	This work was supported by grant R01 HD092347 from the Eunice Kennedy Shriver National Institute of Child Health and Human Development, National Institutes of Health.	Full declaration	Dr Olson reported receiving grants from NIH during the conduct of the study; and research/fellowship funding from the NSF, MacArthur Foundation, Princeton’s Center for Health and Well-Being, the New Jersey Alliance for Clinical and Translational Science, and Princeton University, plus consulting for Sesame Workshop and Kensington TV outside the submitted work. No other disclosures were reported.	Summary: A US/Canada longitudinal cohort of transgender adolescents who accessed puberty blockers and/or hormones reported very high satisfaction, very low regret, and ~97% continuation of care 3–5 years post-initiation. Most felt treatment timing was right or wished it had started earlier. Regret was rare and did not always lead to stopping care. Relevance for guidelines: Supports existing guida…	0
10.1542/peds.2021-056082	Psychosocial	Olson, Kristina R. and Durwood, Lily and Horton, Rachel and Gallagher, Natalie M. and Devor, Aaron	2022	Gender Identity 5 Years After Social Transition	Pediatrics	150	2	1-7	USA and Canada	Cross-sectional or Obervational Cohort	Prospective longitudinal cohort of socially transitioned children.	N = 317 socially transitioned children at enrollment. Age at baseline: 3–12 years (M=8.1). Follow-up: average of 5.4 years post-transition. At baseline: 208 transgender girls, 109 transgender boys. Demographics: 68% White non-Hispanic, 9% White Hispanic, 2% Black, 3% Asian, <1% Native American, 17% multiracial. Household income skewed higher: 66% >$75k annually.	Community or Convenience Sample	Participants were socially transitioned binary transgender children who had changed names and pronouns. Families recruited through community networks, parent support groups, and online outreach as part of the Trans Youth Project.	Social transition	Initial complete binary social transition (name, pronouns, clothing, presentation).			Tx trajectory/Persistance/Desistance/Satisfaction/Regret	≥1yr follow-up	Gender identity assessed by pronoun use, self-identification (child/parent report), and communications with families.			At ~5 years follow-up: 94% identified as binary transgender, 3.5% as nonbinary, 2.5% as cisgender. Overall retransition rate: 7.3% had retransitioned at least once. Some retransitions were temporary (e.g., to nonbinary then back to binary). Retransition to cisgender was more common in those who transitioned very young (before age 6), though still rare (5.6% vs 0.5%). Most cisgender retransitions …		“The collection of the data in this report and some of the authors’ time (KO, RH, and NG) over the course of this project have been supported by: National Institutes of Health grant HD092347, National Science Foundation grants BCS-1523632, SMA-1837857, and SMA-2041463, a grant from the Arcus Foundation (all to KO), and a National Science Foundation GRFP grant to LD. In addition, KO receives finan…	"No conflicts" declaration		Summary: This U.S. and Canadian longitudinal study followed 317 children who socially transitioned between ages 3–12 and tracked their identities for about 5 years. At follow-up, the vast majority (94%) still identified as binary transgender, 3.5% as nonbinary, and 2.5% as cisgender. About 7% had retransitioned at least once, usually before age 10, but some later retransitioned back to a trans id…	3
10.4274/jcrpe.galenos.2023.2023-1-13	PB+ GAHT	Özturan, Esin Karakılıç and Öztürk, Ayşe Pınar and Baş, Firdevs and Erdoğdu, Ayşe Burcu and Kaptan, Seven and Al, Aslı Derya Kardelen and Poyrazoğlu, Şükran and Yıldız, Melek and Direk, Neşe and Yüksel, Şahika and Darendeliler, Feyza	2023	Endocrinological Approach to Adolescents with Gender Dysphoria: Experience of a Pediatric Endocrinology Department in a Tertiary Center in Turkey.	Journal of Clinical Research in Pediatric Endocrinology	15	3	276-284	Turkey	Cross-sectional or Obervational Cohort	Retrospective chart review	N = 53 adolescents with gender dysphoria 26 transfeminine (AMAB) 27 transmasculine (AFAB) Median age at referral: 16.3 yrs (AMAB), 16.4 yrs (AFAB) 28 (53%) received medical intervention; 23 did not (either not suitable or did not consent).	Other clinic,Record Review	Inclusion: all adolescents with GD diagnosis referred 2016–2022, with ≥6 months psychiatric follow-up. Fertility counselling was provided to all. Baseline characteristics: ~9% had attempted suicide prior to referral; PCOS noted in 7 AFAB, 1 AMAB had metabolic syndrome.	Puberty Blockers,GAH (Hormones)	Puberty suppression (GnRHa): triptorelin or leuprolide (n=22). Androgen receptor blockers (cyproterone, bicalutamide): used in AMAB when GnRHa not covered by insurance. GAHT: estradiol (oral/transdermal) or testosterone (injectable); n=21. Supplements: vitamin D and calcium for all on GnRHa.	checked	No external comparator. Internal subgroup contrasts: GnRHa vs AR blocker vs GAHT.	Physical health	<1yr follow-up,≥1yr follow-up	DXA (L1–L4). Hormones: LH, FSH, estradiol, testosterone, prolactin. Metabolic: glucose, insulin, HbA1c, lipids, liver enzymes, vitamin D. Height, weight, BMI measured clinically.			Age at start: median 16.4 yrs — later than typical guideline recommendations. AFAB: menstrual suppression achieved in 3 months, minor breakthrough bleeding in 2 cases. AMAB: incomplete suppression with 3-monthly leuprolide; higher dosing required in some. BMD: baseline lower in AMAB; further declines during GnRHa, especially in low-BMI youth; no significant recovery in short follow-up. Side effec…		The authors declared that this study received no financial support.	"No conflicts" declaration		Summary: This single-center Turkish cohort provides rare evidence from a middle-income setting. Puberty suppression was effective in AFAB youth, but many AMAB required dose escalation and some remained inadequately suppressed. Bone mineral density (BMD) declined further in AMAB, especially those with low BMI, with little recovery over short follow-up. Side effects were mild and transient, consist…	2
[truncated: 54 more rows]

## Sheet: Tab B Full SLR Source List 
DOI / PMID / ID	Type	Discusssed in report?	Authors	Year	Title	Journal	Protocol registration	Funding source(s)	Provenance / Commissioner (verbatim)	COI present?	COI statement (verbatim)	No. included studies	Overlap with this report	Countries represented	Study question	Eligibility criteria	Age eligibility	Under-18 evidence separated?	Synthesis method	Appraisal tools & Notes on Use	Certainty summary	Psychosocial (incl. support for social transition and/or family therapy)	Endocrine / Medical	Surgery	Policy / Legal	Other	Suicidality / Self-harm	Mood / Anxiety / Distress	Gender-related wellbeing / Body image	Family / Peer / Social relations	Bone health	Growth / Neurodevelopment	Cardio-metabolic	Fertility	Sexual function / Puberty progression	Global functioning / QoL	Continuation / Regret	Adverse events / Safety monitoring	Intersectional disparities	Outcome measures / tools (verbatim)	Outcomes synthesised (verbatim)	Main conclusions (1–2 sentences, verbatim)	Notes (methods, tools, caveats)	Bragge 2024 AMSTAR 2 Appraisal	Verbatim notes from Utah Report (Table refs refer to the report)
[truncated: 49 more rows]

[truncated: 11 more sheets: Tab C PRJs mapped to SLRs, Tab D Psychosocial, Tab E Puberty Pausers, Tab F GAHT, Tab G Puberty pausers plus GAHT, Tab H Menstrual suppression, Tab I Fertility preservation, Tab J1 Surgery, Tab J2 Surgery plus other GAHC, Tab K Nonmedical Practices, Tab L Policy & Legal]
